# Supplementary material for: The cell cycle of Leishmania: morphogenetic events and their implications for parasite biology
Source: PubMed Central journal article supplement (PMC3166656; doi:10.1111/j.1365-2958.2010.07479.x), 2010-12-13
Supplement: mmi0079-0647-SD1.pdf [file mmi0079-0647-SD1.pdf]

The cell cycle of *Leishmania*: morphogenetic events and their implications for parasite biology

Richard J Wheeler, Eva Gluenz<sup>1</sup> and Keith Gull

The Sir William Dunn School of Pathology, University of Oxford, South Parks Road, Oxford, OX1 3RE.  
UK

<sup>1</sup>Corresponding author:eva.gluenz@path.ox.ac.uk +44 1865 285456

## Supporting Information

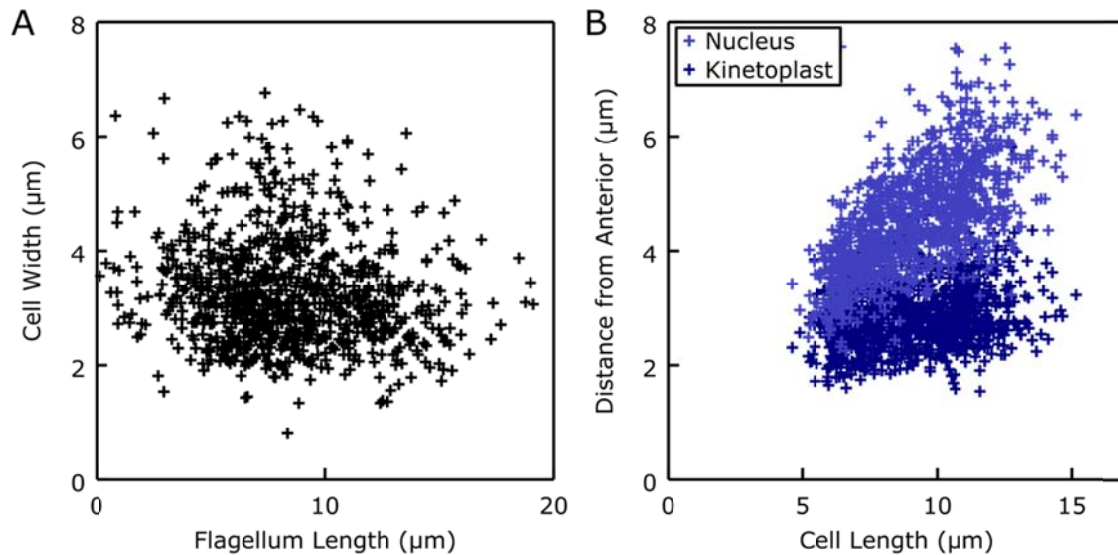

**Figure S1. Further morphology analysis of promastigote *L. mexicana*.** **A.** Scatter plot of cell width against flagellum length of cells from all three culture densities, n=980. Cell width and flagellum length does not show a correlation. **B.** Kinetoplast position (dark blue) does not vary according to cell length and is found at a constant distance of around 2.5 µm from the anterior end of the cell. Nuclear position (light blue) shows a positive correlation with cell length. Both kinetoplast and nucleus position show pooled data from all three culture densities, n=980.

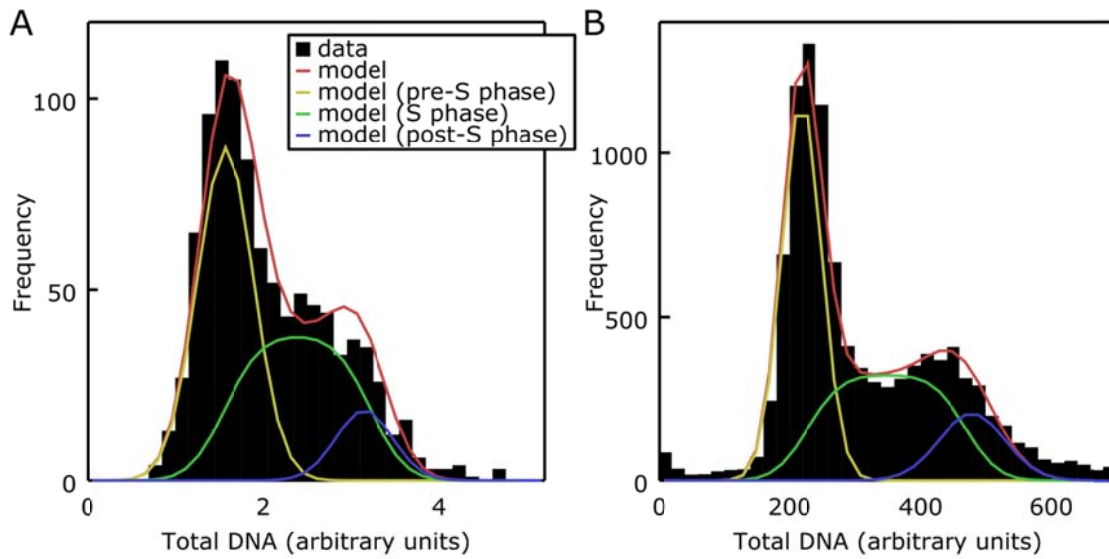

**Figure S2. Calculation of S phase length and timing from histograms of cellular DNA.** Timings of pre-S phase, S phase and post-S phase cell cycle stages can be calculated by fitting a curve (red) to a histogram of cellular DNA content. Black bars represent the experimental data. The four lines indicate components of the fitted model; the area under the red, yellow, green and blue lines gives the number of cells in total, during pre-S phase, during S phase and during post-S phase respectively. **A.** Model fitting to microscopy data (DNA content measured by DAPI staining), n=980. **B.** Model fitting to flow cytometry data (DNA content measured by propidium iodide staining), n=10000.

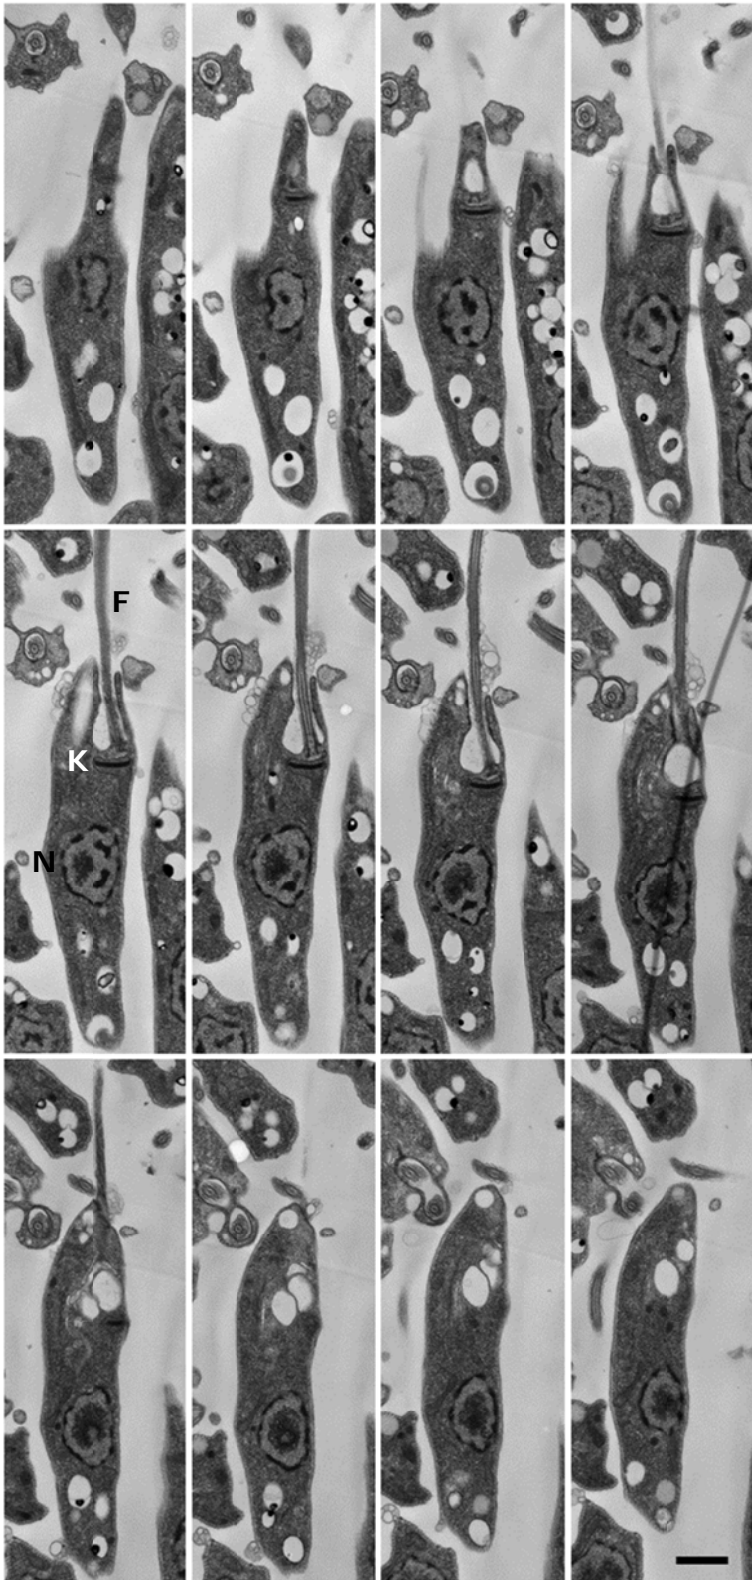

**Figure S3. Electron microscopy of serial sections through a 1K1N cell.** 12 adjacent 90 nm longitudinal sections through a 1K1N cell show the single basal body/pro-basal body pair. For higher magnification of the basal body region see Figure 8B, C. The nucleus (N), kinetoplast (K) and flagellum (F) are indicated. The scale bar represents 1  $\mu\text{m}$ .

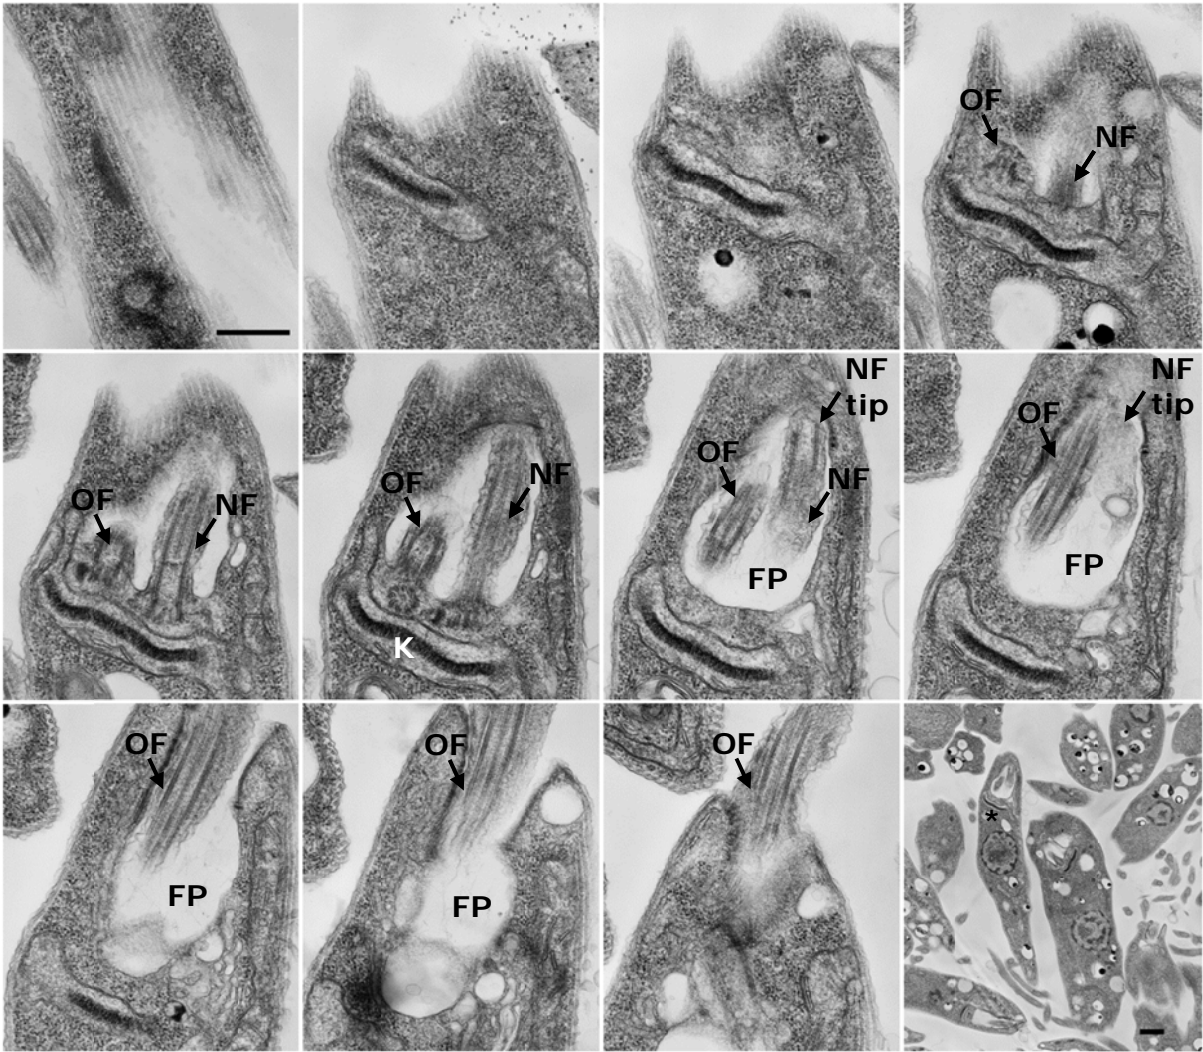

**Figure S4. Electron microscopy of serial sections through a cell in the early stages of new flagellum growth.** 11 adjacent 90 nm longitudinal sections through the cell shown in Figure 8D–F. The flagellar pocket (FP), old flagellum (OF, which extends from the flagellar pocket), new flagellum (NF, which does not extend from the flagellar pocket), new flagellum tip (NF tip) and kinetoplast (K) are indicated. The asterisk in the final panel indicates the region shown at higher magnification in the first 11 panels. The scale bar represents 500 nm (panels 1–11) or 1  $\mu\text{m}$  (panel 12).

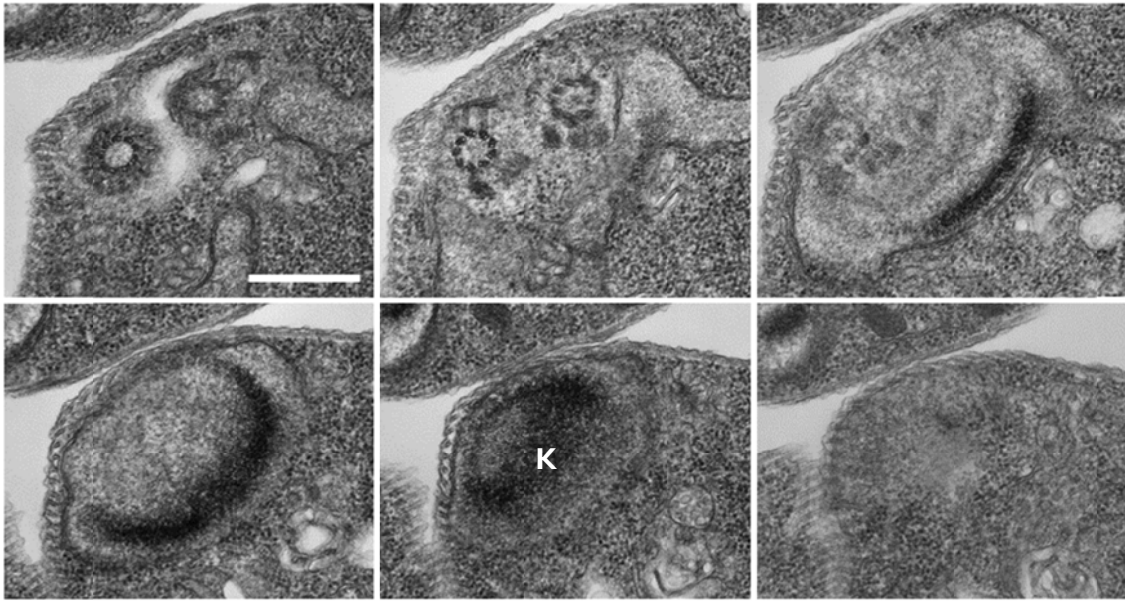

**Figure S5. Electron microscopy of serial sections through a cell with a single kinetoplast and two basal bodies.** 6 adjacent 90 nm sections show two basal body/pro-basal body pairs with the pro-basal bodies lying orthogonal to their partner basal body. For higher magnification of the basal bodies see Figure 8K. The kinetoplast (K) is indicated. The scale bar represents 500 nm.

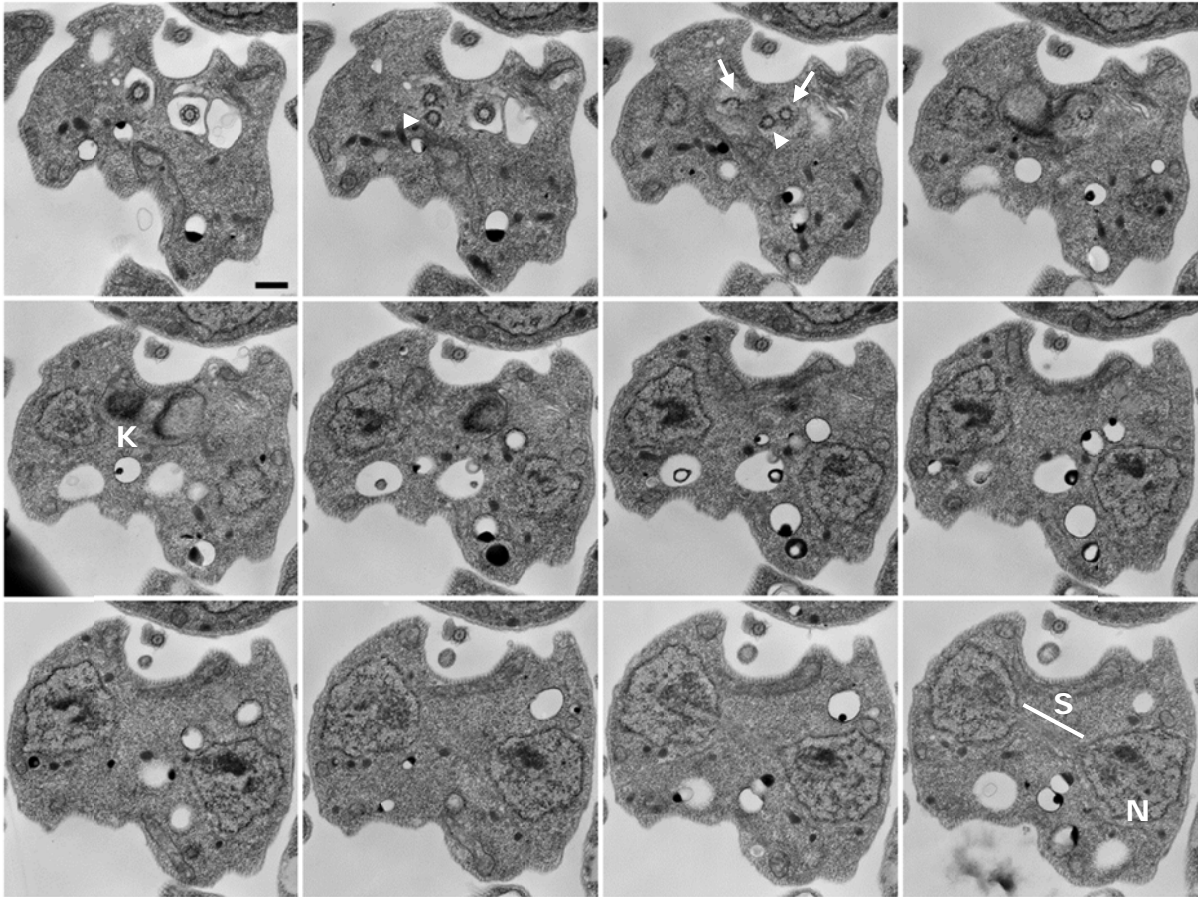

**Figure S6. Electron microscopy of serial sections through a cell with a dividing kinetoplast and mitotic nucleus.** 12 adjacent 90 nm longitudinal sections show the late mitotic nucleus (N) and spindle (S), the dividing kinetoplast (K) and the two basal body (arrows)/pro-basal body (arrowheads) pairs. The pro-basal bodies lie parallel to their partner basal body. The scale bar represents 500 nm.

**Video S1. Time-lapse videos of *Leishmaniamexicana* progressing through the cell cycle.** Cells were trapped in fluid pockets within 0.5% agarose to assist observation and a z-stack was captured every 1 min for 3.5 h. The most in focus slice was selected and rotated for every time point to give a constant cell orientation. Four cells observed at different stages of the cell cycle are shown. Based on morphology data from Figure 5 the four cells were aligned in time to the cell cycle to give a composite overview of the entire cell cycle. Video playback is at 10 frames per second, i.e. 600× actual speed. The scale bar represents 10  $\mu\text{m}$ .

**Table S1. Complete *L. mexicana* promastigote morphometric data set.**

| Culture Density (cells/ml) | Image No | Kinetoplast Count | Nucleus Count | Flagellum Count | Long Flagellum Length (µm) | Short Flagellum Length (µm) | Cell Body Length (µm) | Cell Body Width (µm) | Kin Anterior Distance 1 (µm) | Nuc Anterior Distance 1 (µm) | Kin Nuc Distance 1 (µm) | Kin Anterior Distance 2 (µm) | Nuc Anterior Distance 2 (µm) | Kin Nuc Distance 2 (µm) | Normalised Kin DNA 1 (arbitrary) | Normalised Kin DNA 2 (arbitrary) | Normalised Nuc DNA 1 (arbitrary) | Normalised Nuc DNA 2 (arbitrary) | Cell Cycle Progress (u) |
|----------------------------|----------|-------------------|---------------|-----------------|----------------------------|-----------------------------|-----------------------|----------------------|------------------------------|------------------------------|-------------------------|------------------------------|------------------------------|-------------------------|----------------------------------|----------------------------------|----------------------------------|----------------------------------|-------------------------|
| 3E+06                      | 1        | 1                 | 1             | 1               | 8.769                      | n/a                         | 10.339                | 3.443                | 2.926                        | 4.735                        | 2.181                   | n/a                          | n/a                          | n/a                     | 1.093                            | n/a                              | 1.102                            | n/a                              | 0.3459                  |
| 3E+06                      | 1        | 1                 | 1             | 1               | 7.872                      | n/a                         | 7.618                 | 3.114                | 3.915                        | 5.171                        | 1.322                   | n/a                          | n/a                          | n/a                     | 1.47                             | n/a                              | 1.111                            | n/a                              | 0.1031                  |
| 3E+06                      | 1        | 1                 | 1             | 1               | 11.644                     | n/a                         | 10.464                | 3.195                | 2.591                        | 4.182                        | 1.931                   | n/a                          | n/a                          | n/a                     | 1.414                            | n/a                              | 1.107                            | n/a                              | 0.3749                  |
| 3E+06                      | 1        | 1                 | 1             | 1               | 4.532                      | n/a                         | 9.396                 | 3.227                | 2.891                        | 4.38                         | 2.448                   | n/a                          | n/a                          | n/a                     | 1.795                            | n/a                              | 1.388                            | n/a                              | 0.5133                  |
| 3E+06                      | 1        | 2                 | 2             | 2               | 7.59                       | 3.512                       | 8.959                 | 5.61                 | 3.757                        | 3.271                        | 1.604                   | 4.527                        | 4.953                        | 2.109                   | 1.291                            | 0.882                            | 1.018                            | 1.343                            | 0.858                   |
| 3E+06                      | 1        | 1                 | 1             | 1               | 11.949                     | n/a                         | 12.115                | 5.223                | 3.66                         | 5.331                        | 2.535                   | n/a                          | n/a                          | n/a                     | 2.372                            | n/a                              | 1.695                            | n/a                              | 0.6844                  |
| 3E+06                      | 1        | 1                 | 2             | 5               | 10.984                     | 10.509                      | 9.032                 | 5.883                | 2.891                        | 4.424                        | 1.674                   | n/a                          | 4.123                        | 2.085                   | 2.083                            | n/a                              | 1.032                            | 1.245                            | 0.8703                  |
| 3E+06                      | 1        | 1                 | 1             | 1               | 8.18                       | n/a                         | 8.334                 | 4.909                | 2.948                        | 4.768                        | 1.252                   | n/a                          | n/a                          | n/a                     | 1.063                            | n/a                              | 1.224                            | n/a                              | 0.1425                  |
| 3E+06                      | 1        | 1                 | 1             | 1               | 5.309                      | n/a                         | 9.077                 | 3.825                | 3.085                        | 5.164                        | 2.233                   | n/a                          | n/a                          | n/a                     | 0.937                            | n/a                              | 1.305                            | n/a                              | 0.2326                  |
| 3E+06                      | 1        | 1                 | 1             | 1               | 5.5                        | n/a                         | 8.305                 | 5.012                | 2.996                        | 4.979                        | 3.757                   | n/a                          | n/a                          | n/a                     | 1.55                             | n/a                              | 2.148                            | n/a                              | 1                       |
| 3E+06                      | 1        | 2                 | 2             | 2               | 8.324                      | 8                           | 13.102                | 4.022                | 2.535                        | 4.661                        | 2.768                   | 3.462                        | 5.601                        | 2.801                   | 0.819                            | 1.691                            | 1.289                            | 1.953                            | 0.786                   |
| 3E+06                      | 1        | 1                 | 1             | 1               | 4.272                      | n/a                         | 9.397                 | 4.315                | 2.948                        | 5.338                        | 2.289                   | n/a                          | n/a                          | n/a                     | 0.993                            | n/a                              | 1.356                            | n/a                              | 0.2648                  |
| 3E+06                      | 1        | 1                 | 1             | 1               | 0.975                      | n/a                         | 7.53                  | 2.721                | 3.183                        | 4.877                        | 1.735                   | n/a                          | n/a                          | n/a                     | 0.926                            | n/a                              | 0.9                              | n/a                              | 0.0553                  |
| 3E+06                      | 1        | 1                 | 2             | 2               | 7.553                      | 2.228                       | 9.078                 | 5.096                | 2.801                        | 4.653                        | 2.151                   | n/a                          | 4.182                        | 1.958                   | 2.118                            | n/a                              | 1.282                            | 1.621                            | 0.8336                  |
| 3E+06                      | 1        | 1                 | 1             | 1               | 9.425                      | n/a                         | 13.54                 | 4.412                | 4.362                        | 6.598                        | 3.882                   | n/a                          | n/a                          | n/a                     | 1.741                            | n/a                              | 2.208                            | n/a                              | 0.6772                  |
| 3E+06                      | 1        | 1                 | 2             | 2               | 5.015                      | 0.717                       | 8.196                 | 5.518                | n/a                          | 4.888                        | 2.996                   | n/a                          | 5.035                        | 1.793                   | 2.906                            | n/a                              | 1.05                             | 1.388                            | 0.8457                  |
| 3E+06                      | 1        | 1                 | 1             | 1               | 5.46                       | n/a                         | 12.953                | n/a                  | 3.983                        | 6.386                        | 3.371                   | n/a                          | n/a                          | n/a                     | 1.915                            | n/a                              | 1.89                             | n/a                              | 0.617                   |
| 3E+06                      | 1        | 1                 | 1             | 1               | 11.255                     | n/a                         | 10.169                | 4.424                | 3.604                        | 6.699                        | 3.443                   | n/a                          | n/a                          | n/a                     | 1.714                            | n/a                              | 1.467                            | n/a                              | 0.5036                  |
| 3E+06                      | 1        | 1                 | 1             | 1               | 8.985                      | n/a                         | 12.701                | 4.333                | 3.812                        | 7.261                        | 3.636                   | n/a                          | n/a                          | n/a                     | 2.18                             | n/a                              | 1.669                            | n/a                              | 0.6274                  |
| 3E+06                      | 1        | 1                 | 1             | 1               | 4.824                      | n/a                         | 7.863                 | 3.462                | 2.669                        | 4.516                        | 2.251                   | n/a                          | n/a                          | n/a                     | 0.812                            | n/a                              | 1.061                            | n/a                              | 0.0934                  |
| 3E+06                      | 2        | 1                 | 1             | 1               | 5.01                       | n/a                         | 9.591                 | 3.879                | 3.371                        | 5.221                        | 2.805                   | n/a                          | n/a                          | n/a                     | 1.643                            | n/a                              | 1.161                            | n/a                              | 0.3373                  |
| 3E+06                      | 2        | 1                 | 1             | 1               | 11.488                     | n/a                         | 13.348                | 3.306                | 3.825                        | 6.311                        | 3.114                   | n/a                          | n/a                          | n/a                     | 2.227                            | n/a                              | 2.015                            | n/a                              | 0.7175                  |
| 3E+06                      | 2        | 1                 | 1             | 1               | 7.125                      | n/a                         | 11.139                | 2.944                | 3.207                        | 5.41                         | 2.151                   | n/a                          | n/a                          | n/a                     | 1.399                            | n/a                              | 1.501                            | n/a                              | 0.4594                  |
| 3E+06                      | 2        | 1                 | 1             | 1               | 5.994                      | n/a                         | 10.551                | 3.744                | 2.983                        | 5.253                        | 2.688                   | n/a                          | n/a                          | n/a                     | 1.411                            | n/a                              | 1.626                            | n/a                              | 0.4814                  |
| 3E+06                      | 2        | 1                 | 1             | 1               | 11.732                     | n/a                         | 11.674                | 3.825                | 3.905                        | 5.473                        | 2.279                   | n/a                          | n/a                          | n/a                     | 1.311                            | n/a                              | 1.245                            | n/a                              | 0.4196                  |
| 3E+06                      | 2        | 1                 | 2             | 2               | 7.446                      | 3.107                       | 6.851                 | 5.795                | 3.211                        | 3.702                        | 2.957                   | n/a                          | 3.636                        | 1.027                   | 1.521                            | n/a                              | 1.334                            | 1.066                            | 0.9955                  |
| 3E+06                      | 2        | 2                 | 2             | 2               | 6.793                      | 3.426                       | 6.07                  | 5.53                 | 2.157                        | 2.61                         | 0.717                   | 3.223                        | 3.337                        | 0.935                   | 1.148                            | 1.169                            | 0.953                            | 0.929                            | 0.991                   |
| 3E+06                      | 2        | 1                 | 1             | 1               | 9.145                      | n/a                         | 12.028                | 4.009                | 3.664                        | 5.853                        | 2.405                   | n/a                          | n/a                          | n/a                     | 1.811                            | n/a                              | 1.915                            | n/a                              | 0.6032                  |
| 3E+06                      | 2        | 1                 | 1             | 1               | 8.526                      | n/a                         | 9.812                 | 3.55                 | 3.043                        | 4.835                        | 2.233                   | n/a                          | n/a                          | n/a                     | 1.103                            | n/a                              | 1.304                            | n/a                              | 0.3174                  |
| 3E+06                      | 2        | 1                 | 1             | 1               | 11.851                     | n/a                         | 9.305                 | 4.493                | 3.223                        | 4.835                        | 1.727                   | n/a                          | n/a                          | n/a                     | 1.397                            | n/a                              | 1.488                            | n/a                              | 0.3118                  |
| 3E+06                      | 2        | 1                 | 1             | 1               | 7.656                      | n/a                         | 11.827                | 3.97                 | 3.207                        | 5.331                        | 2.721                   | n/a                          | n/a                          | n/a                     | 2.121                            | n/a                              | 2.296                            | n/a                              | 0.7325                  |
| 3E+06                      | 2        | 1                 | 1             | 1               | 6.438                      | n/a                         | 8.371                 | 4.009                | 2.891                        | 5.104                        | 2.801                   | n/a                          | n/a                          | n/a                     | 1.308                            | n/a                              | 1.047                            | n/a                              | 0.1575                  |
| 3E+06                      | 2        | 1                 | 1             | 1               | 4.382                      | n/a                         | 8.63                  | 3.454                | 2.891                        | 5.131                        | 2.489                   | n/a                          | n/a                          | n/a                     | 1.723                            | n/a                              | 1.374                            | n/a                              | 0.2379                  |
| 3E+06                      | 2        | 1                 | 1             | 1               | 8.033                      | n/a                         | 12.231                | 4.009                | 3.757                        | 5.757                        | 2.891                   | n/a                          | n/a                          | n/a                     | 2.152                            | n/a                              | 1.745                            | n/a                              | 0.6379                  |
| 3E+06                      | 2        | 1                 | 1             | 1               | 8.277                      | n/a                         | 9.013                 | 3.398                | 3.085                        | 4.824                        | 1.931                   | n/a                          | n/a                          | n/a                     | 1.022                            | n/a                              | 1.148                            | n/a                              | 0.2194                  |
| 3E+06                      | 2        | 1                 | 1             | 1               | 6.223                      | n/a                         | 9.452                 | 3.754                | 3.306                        | 4.595                        | 2.091                   | n/a                          | n/a                          | n/a                     | 1.415                            | n/a                              | 0.973                            | n/a                              | 0.273                   |
| 3E+06                      | 2        | 1                 | 1             | 1               | 7.208                      | n/a                         | 9.612                 | 3.586                | 3.064                        | 6.045                        | 3.195                   | n/a                          | n/a                          | n/a                     | 1.44                             | n/a                              | 1.259                            | n/a                              | 0.3259                  |
| 3E+06                      | 2        | 1                 | 1             | 1               | 11.561                     | n/a                         | 10.188                | 3.74                 | 3.043                        | 4.735                        | 2.041                   | n/a                          | n/a                          | n/a                     | 0.799                            | n/a                              | 0.994                            | n/a                              | 0.2923                  |
| 3E+06                      | 2        | 1                 | 1             | 1               | 9.817                      | n/a                         | 11.139                | 4.303                | 3.636                        | 5.966                        | 3.586                   | n/a                          | n/a                          | n/a                     | 1.796                            | n/a                              | 1.747                            | n/a                              | 0.5659                  |
| 3E+06                      | 2        | 1                 | 1             | 1               | 4.896                      | n/a                         | 7.321                 | 4.009                | 3.812                        | 4.447                        | 1.877                   | n/a                          | n/a                          | n/a                     | 0.94                             | n/a                              | 1.268                            | n/a                              | 0.0506                  |
| 3E+06                      | 2        | 1                 | 1             | 1               | 4.692                      | n/a                         | 8.278                 | 4.675                | 3.74                         | 4.047                        | 1.252                   | n/a                          | n/a                          | n/a                     | 0.976                            | n/a                              | 0.977                            | n/a                              | 0.1177                  |
| 3E+06                      | 2        | 1                 | 1             | 2               | 9.49                       | 2.612                       | 10.561                | 5.331                | 2.869                        | 4.784                        | 2.443                   | n/a                          | n/a                          | n/a                     | 2.128                            | n/a                              | 1.738                            | n/a                              | 0.6135                  |
| 3E+06                      | 2        | 1                 | 1             | 1               | 3.29                       | n/a                         | 9.56                  | 4.019                | 3.402                        | 5.426                        | 2.091                   | n/a                          | n/a                          | n/a                     | 1.194                            | n/a                              | 1.461                            | n/a                              | 0.3146                  |
| 3E+06                      | 3        | 1                 | 1             | 1               | 6.9                        | n/a                         | 10.612                | 3.195                | 3.227                        | 5.485                        | 2.405                   | n/a                          | n/a                          | n/a                     | 1.663                            | n/a                              | 1.501                            | n/a                              | 0.4972                  |
| 3E+06                      | 3        | 1                 | 1             | 1               | 9.456                      | n/a                         | 12.591                | 5.01                 | 3.402                        | 4.592                        | 1.513                   | n/a                          | n/a                          | n/a                     | 2.314                            | n/a                              | 2.401                            | n/a                              | 0.7438                  |
| 3E+06                      | 3        | 1                 | 1             | 1               | 6.584                      | n/a                         | 11.605                | 3.064                | 3.757                        | 5.688                        | 2.726                   | n/a                          | n/a                          | n/a                     | 1.946                            | n/a                              | 1.572                            | n/a                              | 0.5625                  |
| 3E+06                      | 3        | 1                 | 1             | 2               | 8.353                      | 0.717                       | 12.355                | 4.218                | 2.745                        | 5.936                        | 2.996                   | n/a                          | n/a                          | n/a                     | 2.477                            | n/a                              | 2.652                            | n/a                              | 0.7744                  |
| 3E+06                      | 3        | 1                 | 1             | 2               | 18.451                     | 6.638                       | 7.152                 | 3.875                | 3.371                        | 4.261                        | 1.293                   | n/a                          | n/a                          | n/a                     | 0.872                            | n/a                              | 1.293                            | n/a                              | 0.0413                  |
| 3E+06                      | 3        | 1                 | 1             | 1               | 3.495                      | n/a                         | 10.274                | 3.517                | 3.337                        | 4.318                        | 1.134                   | n/a                          | n/a                          | n/a                     | 1.453                            | n/a                              | 1.512                            | n/a                              | 0.4378                  |
| 3E+06                      | 3        | 1                 | 1             | 1               | 8.258                      | n/a                         | 7.937                 | 3.409                | 2.801                        | 4.94                         | 2.495                   | n/a                          | n/a                          | n/a                     | 1.388                            | n/a                              | 1.312                            | n/a                              | 0.1301                  |
| 3E+06                      | 3        | 1                 | 1             | 1               | 6.043                      | n/a                         | 10.912                | 3.402                | 3.462                        | 5.294                        | 2.731                   | n/a                          | n/a                          | n/a                     | 2.793                            | n/a                              | 1.483                            | n/a                              | 0.699                   |
| 3E+06                      | 3        | 1                 | 1             | 1               | 8.652                      | n/a                         | 5.901                 | 4.768                | 2.926                        | 3.825                        | 1.293                   | 2.489                        | 4.047                        | 1.283                   | 1.706                            | n/a                              | 0.985                            | n/a                              | 0.0136                  |
| 3E+06                      | 3        | 1                 | 1             | 1               | 6.301                      | n/a                         | 10.507                | 3.931                | 3.195                        | 5.096                        | 1.513                   | n/a                          | n/a                          | n/a                     | 1.371                            | n/a                              | 1.555                            | n/a                              | 0.4348                  |
| 3E+06                      | 3        | 1                 | 1             | 1               | 7.271                      | n/a                         | 12.176                | 3.657                | 3.862                        | 5.473                        | 3.163                   | n/a                          | n/a                          | n/a                     | 1.377                            | n/a                              | 1.728                            | n/a                              | 0.4877                  |
| 3E+06                      | 3        | 1                 | 1             | 1               | 14.291                     | n/a                         | 11.013                | 4.768                | 3.944                        | 5.585                        | 2.028                   | n/a                          | n/a                          | n/a                     | 2.469                            | n/a                              | 1.488                            | n/a                              | 0.645                   |
| 3E+06                      | 3        | 1                 | 1             | 1               | 9.176                      | n/a                         | 9.118                 | 4.538                | 2.745                        | 4.561                        | 2.591                   | n/a                          | n/a                          | n/a                     | 1.768                            | n/a                              | 1.294                            | n/a                              | 0.309                   |
| 3E+06                      | 3        | 1                 | 1             | 1               | 4.558                      | n/a                         | 8.725                 | 3.532                | 3.183                        | 4.435                        | 2.384                   | n/a                          | n/a                          | n/a                     | 1.302                            | n/a                              | 1.468                            | n/a                              | 0.222                   |
| 3E+06                      | 3        | 1                 | 1             | 1               | 7.671                      | n/a                         | 10.445                | 4.315                | 3.528                        | 4.885                        | 2.405                   | n/a                          | n/a                          | n/a                     | 1.98                             | n/a                              | 1.716                            | n/a                              | 0.5895                  |



|       |   |   |   |   |        |       |        |       |       |       |       |       |       |       |       |       |       |       |        |
|-------|---|---|---|---|--------|-------|--------|-------|-------|-------|-------|-------|-------|-------|-------|-------|-------|-------|--------|
| 3E+06 | 3 | 1 | 1 | 1 | 7.132  | n/a   | 11.801 | 4.683 | 2.721 | 7.345 | 3.944 | n/a   | n/a   | n/a   | 2.645 | n/a   | 2.189 | n/a   | 0.7628 |
| 3E+06 | 3 | 1 | 1 | 1 | 4.088  | n/a   | 7.97   | 3.774 | 3.207 | 4.49  | 1.931 | n/a   | n/a   | n/a   | 1.379 | n/a   | 1.343 | n/a   | 0.1375 |
| 3E+06 | 3 | 1 | 1 | 1 | 4.867  | n/a   | 7.515  | 3.306 | 3.247 | 4.76  | 1.814 | n/a   | n/a   | n/a   | 1.537 | n/a   | 1.041 | n/a   | 0.0862 |
| 3E+06 | 5 | 1 | 1 | 1 | 0.935  | n/a   | 5.811  | 4.493 | 3.29  | 3.151 | 1.87  | n/a   | n/a   | n/a   | 1.426 | n/a   | 1.214 | n/a   | 0.0114 |
| 3E+06 | 5 | 1 | 1 | 1 | 2.746  | n/a   | 7.741  | 4.315 | 3.983 | 4.716 | 1.452 | n/a   | n/a   | n/a   | 1.046 | n/a   | 1.053 | n/a   | 0.0886 |
| 3E+06 | 5 | 1 | 1 | 1 | 8.015  | n/a   | 11.386 | 3.047 | 3.754 | 5.49  | 2.745 | n/a   | n/a   | n/a   | 2.309 | n/a   | 1.68  | n/a   | 0.6592 |
| 3E+06 | 5 | 1 | 1 | 1 | 4.984  | n/a   | 7.121  | 3.517 | 3.532 | 4.435 | 1.293 | n/a   | n/a   | n/a   | 1.728 | n/a   | 0.818 | n/a   | 0.0483 |
| 3E+06 | 5 | 1 | 1 | 1 | 6.166  | n/a   | 9.339  | 3.462 | 2.368 | 4.906 | 2.571 | n/a   | n/a   | n/a   | 1.599 | n/a   | 1.224 | n/a   | 0.3062 |
| 3E+06 | 5 | 1 | 1 | 1 | 7.837  | n/a   | 9.919  | 4.303 | 3.812 | 5.987 | 2.669 | n/a   | n/a   | n/a   | 3.456 | n/a   | 1.765 | n/a   | 0.8057 |
| 3E+06 | 5 | 1 | 1 | 1 | 2.645  | n/a   | 10.407 | 4.237 | 3.74  | 6.319 | 3.29  | n/a   | n/a   | n/a   | 2.693 | n/a   | 2.263 | n/a   | 0.794  |
| 3E+06 | 5 | 1 | 1 | 1 | 6.745  | n/a   | 10.124 | 4.617 | 3.757 | 6.106 | 2.61  | n/a   | n/a   | n/a   | 1.619 | n/a   | 1.568 | n/a   | 0.5101 |
| 3E+06 | 5 | 1 | 1 | 1 | 8.012  | n/a   | 12.538 | 3.875 | 3.306 | 6.897 | 3.462 | 4.022 | 7.549 | 3.664 | 2.911 | n/a   | 2.193 | n/a   | 0.7705 |
| 3E+06 | 5 | 1 | 1 | 1 | 3.918  | n/a   | 7.041  | 4.458 | 3.114 | 3.183 | 0.717 | n/a   | n/a   | n/a   | 1.004 | n/a   | 1.069 | n/a   | 0.0251 |
| 3E+06 | 5 | 1 | 1 | 1 | 9.555  | n/a   | 10.787 | 3.08  | 4.197 | 7.487 | 3.517 | n/a   | n/a   | n/a   | 2.165 | n/a   | 1.769 | n/a   | 0.6344 |
| 3E+06 | 5 | 1 | 1 | 1 | 8.489  | n/a   | 10.976 | 4.318 | 3.774 | 6.402 | 2.726 | n/a   | n/a   | n/a   | 3.227 | n/a   | 2.068 | n/a   | 0.7899 |
| 3E+06 | 5 | 1 | 1 | 1 | 2.891  | n/a   | 9.734  | 3.409 | 3.29  | 5.674 | 2.855 | n/a   | n/a   | n/a   | 1.933 | n/a   | 1.271 | n/a   | 0.5198 |
| 3E+06 | 5 | 1 | 1 | 1 | 8.194  | n/a   | 10.488 | 4.088 | 3.757 | 6.127 | 2.731 | n/a   | n/a   | n/a   | 1.923 | n/a   | 1.839 | n/a   | 0.5997 |
| 3E+06 | 5 | 2 | 2 | 2 | 7.249  | 2.381 | 7.618  | 5.966 | 3.561 | 4.592 | 1.221 | 3.163 | 4.661 | 1.735 | 0.684 | 1.846 | 0.951 | 1.108 | 0.9165 |
| 3E+06 | 7 | 1 | 1 | 1 | 6.572  | n/a   | 9.302  | 3.114 | 2.63  | 4.403 | 1.793 | n/a   | n/a   | n/a   | 1.083 | n/a   | 1.365 | n/a   | 0.2594 |
| 3E+06 | 7 | 1 | 1 | 1 | 3.086  | n/a   | 8.665  | 3.636 | 3.744 | 4.237 | 1.612 | n/a   | n/a   | n/a   | 1.431 | n/a   | 1.335 | n/a   | 0.2168 |
| 3E+06 | 7 | 1 | 1 | 1 | 8.602  | n/a   | 8.636  | 4.595 | 3.383 | 4.318 | 2.51  | n/a   | n/a   | n/a   | 1.214 | n/a   | 1.518 | n/a   | 0.2115 |
| 3E+06 | 7 | 1 | 1 | 1 | 8.439  | n/a   | 8.037  | 3.628 | 2.926 | 4.592 | 1.705 | n/a   | n/a   | n/a   | 0.946 | n/a   | 1.234 | n/a   | 0.1104 |
| 3E+06 | 7 | 1 | 1 | 1 | 4.119  | n/a   | 5.615  | 4.022 | 2.745 | 3.586 | 1.604 | n/a   | n/a   | n/a   | 0.984 | n/a   | 1.312 | n/a   | 0.0045 |
| 3E+06 | 7 | 1 | 1 | 1 | 3.469  | n/a   | 8.75   | 3.517 | 4.163 | 5.61  | 2.268 | n/a   | n/a   | n/a   | 0.915 | n/a   | 1.125 | n/a   | 0.175  |
| 3E+06 | 7 | 1 | 1 | 1 | 6.147  | n/a   | 7.214  | 3.604 | 3.183 | 4.501 | 2.181 | n/a   | n/a   | n/a   | 1.097 | n/a   | 1.479 | n/a   | 0.0577 |
| 3E+06 | 7 | 1 | 1 | 1 | 5.826  | n/a   | 11.458 | 4.309 | 3.302 | 5.901 | 2.495 | n/a   | n/a   | n/a   | 1.464 | n/a   | 1.378 | n/a   | 0.4563 |
| 3E+06 | 7 | 2 | 2 | 2 | 8.474  | 4.441 | 8.246  | 5.063 | 2.489 | 3.604 | 1.651 | 2.61  | 3.754 | 1.814 | 0.963 | 1.146 | 1.046 | 0.979 | 0.9865 |
| 3E+06 | 7 | 2 | 2 | 2 | 6.691  | 3.227 | 7.28   | 5.987 | 2.313 | 3.915 | 1.604 | 2.74  | 4.057 | 1.434 | 0.875 | 1.046 | 1.059 | 1.54  | 0.9208 |
| 3E+06 | 7 | 1 | 1 | 1 | 12.989 | n/a   | 11.795 | 4.012 | 3.74  | 5.64  | 2.411 | n/a   | n/a   | n/a   | 1.198 | n/a   | 1.293 | n/a   | 0.4165 |
| 3E+06 | 7 | 1 | 1 | 1 | 1.513  | n/a   | 9.227  | 3.902 | 3.618 | 5.012 | 2.411 | n/a   | n/a   | n/a   | 1.401 | n/a   | 1.34  | n/a   | 0.2867 |
| 3E+06 | 7 | 1 | 1 | 1 | 5.536  | n/a   | 9.576  | 3.862 | 2.842 | 5.134 | 2.654 | n/a   | n/a   | n/a   | 0.887 | n/a   | 1.402 | n/a   | 0.2785 |
| 3E+06 | 8 | 1 | 1 | 1 | 3.741  | n/a   | 9.342  | 3.586 | 2.948 | 5.071 | 2.028 | n/a   | n/a   | n/a   | 2.024 | n/a   | 2.07  | n/a   | 0.6556 |
| 3E+06 | 8 | 1 | 1 | 1 | 4.661  | n/a   | 8.363  | 4.27  | 3.432 | 5.294 | 2.505 | n/a   | n/a   | n/a   | 1.37  | n/a   | 1.406 | n/a   | 0.183  |
| 3E+06 | 8 | 1 | 1 | 1 | 11.797 | n/a   | 10.066 | 3.207 | 2.448 | 4.628 | 1.931 | n/a   | n/a   | n/a   | 1.06  | n/a   | 1.241 | n/a   | 0.3344 |
| 3E+06 | 8 | 1 | 1 | 1 | 13.356 | n/a   | 13.41  | 2.745 | 2.645 | 5.455 | 2.566 | n/a   | n/a   | n/a   | 1.54  | n/a   | 1.465 | n/a   | 0.4751 |
| 3E+06 | 8 | 1 | 1 | 1 | 11.877 | n/a   | 7.962  | 5.688 | 3.931 | 5.253 | 2.181 | n/a   | n/a   | n/a   | 1.396 | n/a   | 1.88  | n/a   | 0.1779 |
| 3E+06 | 8 | 1 | 1 | 2 | 8.097  | 1.897 | 11.636 | 3.586 | 3.825 | 6.272 | 2.51  | n/a   | n/a   | n/a   | 2.54  | n/a   | 2.196 | n/a   | 0.759  |
| 3E+06 | 8 | 2 | 2 | 2 | 9.957  | 2.827 | 9.301  | 4.653 | 2.688 | 4.675 | 1.076 | 3.306 | 3.744 | 2.296 | 1.64  | 1.122 | 1.08  | 1.271 | 0.8216 |
| 3E+06 | 8 | 1 | 1 | 1 | 10.324 | n/a   | 7.864  | 3.306 | 3.211 | 4.749 | 1.221 | n/a   | n/a   | n/a   | 1.645 | n/a   | 1.449 | n/a   | 0.15   |
| 3E+06 | 8 | 1 | 1 | 1 | 4      | n/a   | 8.402  | 3.502 | 2.801 | 5.02  | n/a   | n/a   | n/a   | n/a   | 0.933 | n/a   | 0.889 | n/a   | 0.1227 |
| 3E+06 | 8 | 1 | 1 | 1 | 3.247  | n/a   | 8.613  | 3.085 | 3.383 | 4.848 | 1.604 | n/a   | n/a   | n/a   | 1.369 | n/a   | 1.235 | n/a   | 0.2037 |
| 3E+06 | 8 | 1 | 1 | 1 | 7.959  | n/a   | 11.551 | 3.398 | 3.702 | 6.947 | 4.261 | n/a   | n/a   | n/a   | 1.302 | n/a   | 1.604 | n/a   | 0.4688 |
| 3E+06 | 8 | 1 | 1 | 1 | 7.076  | n/a   | 7.166  | 3.469 | 2.453 | 3.432 | 1.479 | n/a   | n/a   | n/a   | 0.686 | n/a   | 1.209 | n/a   | 0.0343 |
| 3E+06 | 8 | 1 | 1 | 1 | 10.862 | n/a   | 10.325 | 3.371 | 3.306 | 4.377 | 2.296 | n/a   | n/a   | n/a   | 1.567 | n/a   | 1.844 | n/a   | 0.5492 |
| 3E+06 | 8 | 1 | 1 | 1 | 9.186  | n/a   | 9.494  | 4.716 | 3.744 | 5.742 | 1.828 | n/a   | n/a   | n/a   | 1.367 | n/a   | 1.479 | n/a   | 0.3316 |
| 3E+06 | 8 | 1 | 1 | 1 | 7.952  | n/a   | 12.767 | 2.891 | 5.811 | 3.227 | n/a   | n/a   | n/a   | n/a   | 1.811 | n/a   | 1.639 | n/a   | 0.5426 |
| 3E+06 | 8 | 1 | 1 | 1 | 6.346  | n/a   | 10.8   | 4.022 | 3.428 | 5.782 | 3.051 | n/a   | n/a   | n/a   | 1.669 | n/a   | 1.659 | n/a   | 0.5328 |
| 3E+06 | 8 | 1 | 1 | 1 | 7.035  | n/a   | 7.861  | 3.398 | 2.891 | 4.182 | 1.771 | n/a   | n/a   | n/a   | 1.395 | n/a   | 1.222 | n/a   | 0.1202 |
| 3E+06 | 8 | 1 | 1 | 0 | n/a    | n/a   | 10.255 | 4.038 | 3.306 | 5.455 | 2.245 | n/a   | n/a   | n/a   | 1.204 | n/a   | 1.57  | n/a   | 0.3926 |
| 3E+06 | 8 | 1 | 1 | 1 | 3.114  | n/a   | 9.88   | 3.882 | 3.73  | 4.95  | 2.028 | n/a   | n/a   | n/a   | 1.512 | n/a   | 1.592 | n/a   | 0.4845 |
| 3E+06 | 8 | 1 | 1 | 1 | 12.96  | n/a   | 9.074  | 4.315 | 3.383 | 5.585 | 2.181 | n/a   | n/a   | n/a   | 1.019 | n/a   | 1.217 | n/a   | 0.2299 |
| 3E+06 | 8 | 1 | 1 | 1 | 8.298  | n/a   | 11.327 | 3.064 | 3.243 | 4.811 | 1.951 | n/a   | n/a   | n/a   | 0.97  | n/a   | 1.369 | n/a   | 0.3985 |
| 3E+06 | 8 | 1 | 1 | 0 | n/a    | n/a   | 6.683  | 4.76  | 3.097 | 5.033 | 1.156 | n/a   | n/a   | n/a   | 1.137 | n/a   | 1.161 | n/a   | 0.0182 |
| 3E+06 | 8 | 1 | 1 | 1 | 7.108  | n/a   | 8.114  | 4.098 | 2.505 | 3.586 | 1.674 | n/a   | n/a   | n/a   | 0.942 | n/a   | 1.388 | n/a   | 0.1251 |
| 3E+06 | 8 | 1 | 1 | 1 | 3.153  | n/a   | 9.003  | 3.692 | 3.902 | 5.452 | 2.228 | n/a   | n/a   | n/a   | 0.996 | n/a   | 1.366 | n/a   | 0.2273 |
| 3E+06 | 9 | 1 | 1 | 1 | 7.401  | n/a   | 9.794  | 3.744 | 3.409 | 4.683 | 1.828 | n/a   | n/a   | n/a   | 1.004 | n/a   | 1.061 | n/a   | 0.2758 |
| 3E+06 | 9 | 1 | 1 | 1 | 11.129 | n/a   | 11.867 | 4.057 | 3.051 | 5.951 | 3.163 | n/a   | n/a   | n/a   | 1.175 | n/a   | 1.577 | n/a   | 0.444  |
| 3E+06 | 9 | 1 | 1 | 1 | 13.284 | n/a   | 10.328 | 3.383 | 2.745 | 5.594 | 2.983 | n/a   | n/a   | n/a   | 1.225 | n/a   | 1.154 | n/a   | 0.3545 |
| 3E+06 | 9 | 1 | 1 | 1 | 6.389  | n/a   | 7.516  | 3.432 | 2.63  | 4.27  | 1.434 | n/a   | n/a   | n/a   | 1.159 | n/a   | 1.397 | n/a   | 0.0838 |
| 3E+06 | 9 | 1 | 1 | 1 | 6.982  | n/a   | 10.82  | 3.402 | 3.961 | 5.154 | 2.028 | n/a   | n/a   | n/a   | 1.06  | n/a   | 1.347 | n/a   | 0.3808 |
| 3E+06 | 9 | 1 | 1 | 1 | 7.468  | n/a   | 10.801 | 3.517 | 3.586 | 5.071 | 2.151 | n/a   | n/a   | n/a   | 1.625 | n/a   | 1.743 | n/a   | 0.5393 |
| 3E+06 | 9 | 1 | 1 | 1 | 9.96   | n/a   | 11.56  | 3.875 | 4.012 | 6.44  | 3.183 | n/a   | n/a   | n/a   | 1.65  | n/a   | 1.599 | n/a   | 0.5262 |
| 3E+06 | 9 | 1 | 1 | 1 | 13.696 | n/a   | 10.354 | 2.443 | 2.335 | 4.974 | 2.996 | n/a   | n/a   | n/a   | 1.349 | n/a   | 1.242 | n/a   | 0.3778 |
| 3E+06 | 9 | 1 | 1 | 1 | 3.806  | n/a   | 8.402  | 3.302 | 3.517 | 4.019 | 1.479 | n/a   | n/a   | n/a   | 1.058 | n/a   | 1.535 | n/a   | 0.1728 |
| 3E+06 | 9 | 1 | 1 | 1 | 4.589  | n/a   | 8.982  | 3.454 | 3.371 | 4.342 | 2.411 | n/a   | n/a   | n/a   | 1.317 | n/a   | 1.195 | n/a   | 0.2433 |

|       |    |   |   |   |        |       |        |       |       |       |       |       |       |       |       |       |       |       |        |
|-------|----|---|---|---|--------|-------|--------|-------|-------|-------|-------|-------|-------|-------|-------|-------|-------|-------|--------|
| 3E+06 | 9  | 1 | 1 | 1 | 11.722 | n/a   | 10.382 | 3.183 | 4.403 | 6.604 | 2.837 | n/a   | n/a   | n/a   | 1.631 | n/a   | 1.412 | n/a   | 0.4657 |
| 3E+06 | 9  | 1 | 1 | 2 | 6.085  | 1.579 | 11.19  | 5.094 | 3.247 | 4.848 | 1.951 | n/a   | n/a   | n/a   | 1.998 | n/a   | 2.084 | n/a   | 0.67   |
| 3E+06 | 9  | 1 | 1 | 1 | 5.142  | n/a   | 10.841 | 3.961 | 3.852 | 6.036 | 2.654 | n/a   | n/a   | n/a   | 2.132 | n/a   | 2.416 | n/a   | 0.7362 |
| 3E+06 | 9  | 1 | 1 | 1 | 7.045  | n/a   | 8.833  | 3.862 | 3.151 | 4.974 | 0.975 | n/a   | n/a   | n/a   | 0.788 | n/a   | 1.197 | n/a   | 0.1856 |
| 3E+06 | 9  | 2 | 2 | 2 | 5.719  | 1.931 | 6.45   | 6.246 | 3.348 | 4.435 | 0.975 | 2.869 | 4.558 | 1.361 | 1.116 | 1.257 | 0.93  | 1.267 | 0.9337 |
| 3E+06 | 9  | 2 | 2 | 2 | 2.983  | 1.167 | 8.246  | 6.67  | 4.138 | 5.518 | 1.828 | 3.207 | 4.342 | 1.793 | 1.193 | 1.128 | 1.13  | 1.374 | 0.8786 |
| 3E+06 | 9  | 1 | 1 | 1 | 5.737  | n/a   | 8.613  | 4.182 | 3.207 | 4.94  | 1.604 | n/a   | n/a   | n/a   | 1.763 | n/a   | 1.775 | n/a   | 0.5793 |
| 3E+06 | 9  | 1 | 1 | 1 | 9.202  | n/a   | 7.955  | 2.645 | 3.211 | 4.009 | 0.818 | n/a   | n/a   | n/a   | 1.297 | n/a   | 0.794 | n/a   | 0.1055 |
| 3E+06 | 9  | 1 | 1 | 0 | n/a    | n/a   | 11.263 | 4.303 | 4.675 | 6.886 | 2.996 | n/a   | n/a   | n/a   | 2.479 | n/a   | 2.187 | n/a   | 0.7552 |
| 3E+06 | 9  | 1 | 1 | 1 | 8.606  | n/a   | 12.251 | 3.692 | 4.082 | 5.793 | 2.654 | n/a   | n/a   | n/a   | 1.863 | n/a   | 2.166 | n/a   | 0.6736 |
| 3E+06 | 9  | 1 | 1 | 1 | 7.05   | n/a   | 9.467  | 2.731 | 2.768 | 4.695 | 2.405 | n/a   | n/a   | n/a   | 0.975 | n/a   | 1.23  | n/a   | 0.2621 |
| 3E+06 | 9  | 1 | 1 | 1 | 11.552 | n/a   | 9.989  | 4.088 | 3.657 | 5.455 | 2.405 | n/a   | n/a   | n/a   | 1.183 | n/a   | 1.474 | n/a   | 0.3516 |
| 3E+06 | 10 | 1 | 1 | 1 | 7.207  | n/a   | 9.309  | 3.586 | 4.592 | 6.543 | 2.085 | n/a   | n/a   | n/a   | 1.245 | n/a   | 1.338 | n/a   | 0.2812 |
| 3E+06 | 10 | 1 | 1 | 1 | 4.455  | n/a   | 8.75   | 2.837 | 3.085 | 4.098 | 1.604 | n/a   | n/a   | n/a   | 1.089 | n/a   | 1.164 | n/a   | 0.1985 |
| 3E+06 | 10 | 1 | 1 | 1 | 4.182  | n/a   | 8.147  | 2.51  | n/a   | 3.432 | 4.237 | n/a   | n/a   | n/a   | 1.135 | n/a   | 1.214 | n/a   | 0.1276 |
| 3E+06 | 10 | 1 | 1 | 2 | 4.456  | 3.961 | 10.462 | 3.72  | 4.303 | 6.551 | 2.489 | n/a   | n/a   | n/a   | 1.206 | n/a   | 1.105 | n/a   | 0.3632 |
| 3E+06 | 10 | 1 | 1 | 1 | 4.031  | n/a   | 11.431 | 4.309 | 4.138 | 6.402 | 3.207 | n/a   | n/a   | n/a   | 1.368 | n/a   | 1.453 | n/a   | 0.447  |
| 3E+06 | 10 | 2 | 2 | 2 | 0.864  | 0.661 | 8.523  | 6.366 | 3.348 | 4.561 | 1.479 | 3.114 | 4.661 | 1.37  | 1.656 | 0.957 | 1.088 | 1.242 | 0.8539 |
| 3E+06 | 10 | 1 | 1 | 1 | 9.694  | n/a   | 13.791 | 3.368 | 3.542 | 6.416 | 3.368 | n/a   | n/a   | n/a   | 2.112 | n/a   | 1.969 | n/a   | 0.7027 |
| 3E+06 | 10 | 1 | 1 | 1 | 12.337 | n/a   | 12.589 | 3.302 | 3.064 | 5.071 | 2.801 | n/a   | n/a   | n/a   | 1.547 | n/a   | 1.661 | n/a   | 0.5165 |
| 3E+06 | 10 | 1 | 1 | 1 | 12.421 | n/a   | 9.791  | 2.855 | 2.427 | 4.877 | 2.448 | n/a   | n/a   | n/a   | 0.598 | n/a   | 0.718 | n/a   | 0.2567 |
| 3E+06 | 10 | 2 | 2 | 2 | 2.948  | 1.87  | 8.142  | 5.61  | 3.08  | 4.234 | 1.604 | 2.904 | 3.383 | 1.379 | 1.274 | 1.149 | 1.265 | 1.72  | 0.8417 |
| 3E+06 | 10 | 1 | 2 | 2 | 9.484  | 2.61  | 7.605  | 6.35  | 2.51  | 4.218 | 3.223 | n/a   | 4.885 | 1.87  | 2.063 | n/a   | 1.1   | 1.017 | 0.982  |
| 3E+06 | 10 | 1 | 1 | 1 | 8.705  | n/a   | 11.294 | 3.967 | 4.009 | 5.331 | 3.243 | n/a   | n/a   | n/a   | 0.852 | n/a   | 1.249 | n/a   | 0.369  |
| 3E+06 | 10 | 1 | 1 | 0 | n/a    | n/a   | 8.82   | 4.022 | 4.279 | 4.974 | 1.513 | n/a   | n/a   | n/a   | 1.394 | n/a   | 1.041 | n/a   | 0.2141 |
| 3E+06 | 10 | 1 | 1 | 1 | 3.722  | n/a   | 7.858  | 3.702 | 3.967 | 4.822 | 1.479 | n/a   | n/a   | n/a   | 1.009 | n/a   | 1.043 | n/a   | 0.0982 |
| 3E+06 | 10 | 1 | 1 | 1 | 2.261  | n/a   | 8.878  | 3.195 | 3.151 | 4.561 | 2.085 | n/a   | n/a   | n/a   | 1.072 | n/a   | 1.207 | n/a   | 0.2063 |
| 3E+06 | 10 | 1 | 1 | 1 | 13.388 | n/a   | 8.419  | 2.028 | 2.535 | 4.738 | 2.054 | n/a   | n/a   | n/a   | 0.776 | n/a   | 0.769 | n/a   | 0.108  |
| 3E+06 | 10 | 1 | 1 | 1 | 6.678  | n/a   | 9.467  | 3.862 | 3.443 | 5.71  | 2.313 | n/a   | n/a   | n/a   | 1.952 | n/a   | 1.954 | n/a   | 0.6204 |
| 3E+06 | 10 | 1 | 1 | 0 | n/a    | n/a   | 10.929 | 4.123 | 3.409 | 5.695 | 2.427 | n/a   | n/a   | n/a   | 1.699 | n/a   | 2.046 | n/a   | 0.5963 |
| 3E+06 | 10 | 1 | 1 | 1 | 9.285  | n/a   | 9.655  | 4.009 | 3.74  | 5.023 | 1.771 | n/a   | n/a   | n/a   | 1.141 | n/a   | 1.483 | n/a   | 0.3231 |
| 3E+06 | 10 | 2 | 2 | 2 | 6.231  | 3.611 | 6.543  | 6.354 | 3.348 | 4.009 | 1.37  | 2.669 | 3.66  | 2.085 | 0.842 | 1.077 | 0.986 | 1.18  | 0.9776 |
| 3E+06 | 10 | 1 | 1 | 1 | 10.381 | n/a   | 11.775 | 3.915 | 3.443 | 5.987 | 3.085 | n/a   | n/a   | n/a   | 1.732 | n/a   | 1.985 | n/a   | 0.5929 |
| 3E+06 | 10 | 1 | 1 | 1 | 5.352  | n/a   | 7.189  | 3.66  | 3.825 | 4.377 | 1.156 | n/a   | n/a   | n/a   | 0.708 | n/a   | 1.149 | n/a   | 0.032  |
| 3E+06 | 10 | 1 | 2 | 2 | 7.618  | 3.743 | 8.203  | 4.971 | 2.886 | 3.961 | 1.931 | n/a   | 3.905 | 1.134 | 1.282 | n/a   | 0.886 | 1.032 | 0.1933 |
| 3E+06 | 11 | 1 | 1 | 1 | 14.901 | n/a   | 11.884 | 4.038 | 3.604 | 5.795 | 3.047 | n/a   | n/a   | n/a   | 1.427 | n/a   | 1.753 | n/a   | 0.5004 |
| 3E+06 | 11 | 1 | 1 | 1 | 5.221  | n/a   | 10.82  | 4.716 | 3.469 | 4.877 | 1.579 | n/a   | n/a   | n/a   | 1.207 | n/a   | 1.072 | n/a   | 0.3661 |
| 3E+06 | 11 | 1 | 1 | 1 | 6.494  | n/a   | 12.213 | 3.097 | 3.586 | 5.793 | 2.957 | n/a   | n/a   | n/a   | 1.704 | n/a   | 1.562 | n/a   | 0.5295 |
| 3E+06 | 11 | 1 | 1 | 1 | 6.913  | n/a   | 7.475  | 3.628 | 3.337 | 4.088 | 1.322 | n/a   | n/a   | n/a   | 0.73  | n/a   | 0.956 | n/a   | 0.0459 |
| 3E+06 | 11 | 1 | 1 | 1 | 6.907  | n/a   | 10.627 | 3.542 | 2.586 | 4.218 | 2.505 | n/a   | n/a   | n/a   | 1.181 | n/a   | 1.489 | n/a   | 0.4015 |
| 3E+06 | 11 | 1 | 1 | 2 | 4.719  | 0.935 | 9.596  | 5.134 | 3.371 | 4.784 | 2.759 | n/a   | n/a   | n/a   | 2.487 | n/a   | 2.431 | n/a   | 0.8176 |
| 3E+06 | 11 | 2 | 2 | 2 | 8.9    | 3.163 | 7.95   | 6.472 | 2.61  | 4.038 | 1.452 | 2.61  | 4.67  | 1.322 | 1.455 | 1.366 | 1.42  | 1.245 | 0.8498 |
| 3E+06 | 11 | 1 | 1 | 1 | 4.304  | n/a   | 7.549  | 3.586 | 4.169 | 5.154 | 1.958 | n/a   | n/a   | n/a   | 1.369 | n/a   | 1.023 | n/a   | 0.0814 |
| 3E+06 | 11 | 1 | 1 | 1 | 9.973  | n/a   | 12.628 | 3.247 | 2.759 | 6.326 | 2.654 | n/a   | n/a   | n/a   | 1.226 | n/a   | 1.63  | n/a   | 0.4719 |
| 3E+06 | 11 | 1 | 1 | 1 | 7.39   | n/a   | 10.682 | 3.561 | 2.61  | 4.088 | 1.958 | n/a   | n/a   | n/a   | 1.145 | n/a   | 1.42  | n/a   | 0.3867 |
| 3E+06 | 11 | 2 | 2 | 2 | 8.169  | 2.759 | 7.475  | 6.272 | 2.591 | 3.862 | 1.983 | 2.63  | 3.469 | 1.322 | 1.181 | 1.113 | 1.437 | 1.207 | 0.8953 |
| 3E+06 | 11 | 1 | 1 | 1 | 9.051  | n/a   | 6.803  | 4.625 | 3.227 | 4.303 | 1.361 | n/a   | n/a   | n/a   | 1.57  | n/a   | 0.899 | n/a   | 0.0228 |
| 3E+06 | 11 | 1 | 1 | 1 | 4.634  | n/a   | 7.665  | 3.337 | 2.842 | 3.754 | 1.134 | n/a   | n/a   | n/a   | 1.383 | n/a   | 0.964 | n/a   | 0.0958 |
| 3E+06 | 11 | 1 | 1 | 1 | 7.089  | n/a   | 11.083 | 4.182 | 3.502 | 6.464 | 3.163 | n/a   | n/a   | n/a   | 1.195 | n/a   | 1.327 | n/a   | 0.4075 |
| 3E+06 | 11 | 1 | 1 | 2 | 5.444  | 2.085 | 8.174  | 3.852 | 3.159 | 4.735 | 2.028 | n/a   | n/a   | n/a   | 2.82  | n/a   | 1.533 | n/a   | 0.9251 |
| 3E+06 | 11 | 1 | 1 | 1 | 10.693 | n/a   | 7.863  | 3.097 | 3.306 | 4.885 | 1.931 | n/a   | n/a   | n/a   | 0.874 | n/a   | 0.992 | n/a   | 0.091  |
| 3E+06 | 11 | 1 | 1 | 1 | 6.466  | n/a   | 9.75   | 2.61  | 2.759 | 4.762 | 2.313 | n/a   | n/a   | n/a   | 0.899 | n/a   | 1.29  | n/a   | 0.284  |
| 3E+06 | 11 | 2 | 2 | 2 | 9.038  | 3.148 | 8.326  | 5.253 | 2.996 | 3.657 | 1.014 | 2.591 | 4.182 | 1.877 | 1.56  | 1.228 | 0.919 | 0.78  | 0.9038 |
| 3E+06 | 11 | 1 | 1 | 1 | 4.261  | n/a   | 8.145  | 3.443 | 3.302 | 4.814 | 1.958 | n/a   | n/a   | n/a   | 1.346 | n/a   | 1.34  | n/a   | 0.155  |
| 3E+06 | 11 | 1 | 1 | 1 | 10.883 | n/a   | 12.204 | 3.211 | 4.012 | 4.564 | 1.651 | n/a   | n/a   | n/a   | 0.902 | n/a   | 1.315 | n/a   | 0.4105 |
| 3E+06 | 11 | 2 | 2 | 2 | 5.996  | 3.744 | 7.603  | 5.033 | 3.195 | 5.455 | 2.645 | 2.726 | 4.541 | 1.513 | 0.653 | 0.858 | 1.196 | 1.217 | 0.9731 |
| 3E+06 | 11 | 1 | 1 | 1 | 4.574  | n/a   | 9.342  | 3.915 | 3.862 | 5.613 | 2.948 | n/a   | n/a   | n/a   | 1.16  | n/a   | 1.839 | n/a   | 0.3287 |
| 3E+06 | 11 | 1 | 1 | 1 | 7.255  | n/a   | 8.926  | 3.223 | 2.904 | 4.919 | 2.405 | n/a   | n/a   | n/a   | 1.17  | n/a   | 1.363 | n/a   | 0.2353 |
| 3E+06 | 11 | 1 | 1 | 1 | 10.978 | n/a   | 10.127 | 3.085 | 3.047 | 5.809 | 2.443 | n/a   | n/a   | n/a   | 0.902 | n/a   | 1.206 | n/a   | 0.3202 |
| 3E+06 | 11 | 1 | 1 | 1 | 6.211  | n/a   | 7.159  | 3.211 | 3.636 | 5.164 | 2.443 | n/a   | n/a   | n/a   | 1.809 | n/a   | 1.295 | n/a   | 0.0719 |
| 3E+06 | 12 | 0 | 2 | 1 | 12.995 | n/a   | 10.82  | 2.586 | 3.55  | 6.127 | 2.405 | n/a   | n/a   | n/a   | n/a   | n/a   | 1.19  | 0.725 | 0.3603 |
| 3E+06 | 12 | 1 | 1 | 1 | 4.304  | n/a   | 8.821  | 4.234 | 3.247 | 4.493 | 2.181 | n/a   | n/a   | n/a   | 1.128 | n/a   | 1.643 | n/a   | 0.2406 |
| 3E+06 | 12 | 1 | 1 | 1 | 10.209 | n/a   | 7.508  | 3.398 | 4.047 | 3.604 | 0.507 | n/a   | n/a   | n/a   | 0.693 | n/a   | 0.917 | n/a   | 0.0436 |
| 3E+06 | 12 | 2 | 2 | 2 | 8.347  | 4.764 | 6.598  | 5.782 | 3.175 | 4.318 | 0.453 | 3.398 | 3.983 | 1.764 | 0.526 | 0.769 | 1.413 | 1.069 | 0.9687 |
| 3E+06 | 12 | 1 | 1 | 1 | 6.274  | n/a   | 11.097 | 3.657 | 3.043 | 6.851 | 4.197 | n/a   | n/a   | n/a   | 1.421 | n/a   | 1.59  | n/a   | 0.4782 |

|       |    |   |   |   |        |       |        |       |       |       |       |       |       |       |       |       |       |       |        |
|-------|----|---|---|---|--------|-------|--------|-------|-------|-------|-------|-------|-------|-------|-------|-------|-------|-------|--------|
| 3E+06 | 12 | 1 | 1 | 1 | 3.306  | n/a   | 11.295 | 4.107 | 3.337 | 6.386 | 2.957 | n/a   | n/a   | n/a   | 1.933 | n/a   | 2.456 | n/a   | 0.725  |
| 3E+06 | 12 | 1 | 1 | 1 | 12.37  | n/a   | 7.81   | 3.961 | 2.411 | 4.009 | 2.085 | n/a   | n/a   | n/a   | 1.629 | n/a   | 1.459 | n/a   | 0.14   |
| 3E+06 | 12 | 1 | 1 | 1 | 7.871  | n/a   | 10.447 | 3.043 | 2.296 | 5.311 | 2.443 | n/a   | n/a   | n/a   | 1.296 | n/a   | 1.653 | n/a   | 0.4409 |
| 3E+06 | 12 | 1 | 1 | 1 | 14.458 | n/a   | 10.904 | 3.849 | 3.561 | 5.124 | 3.825 | n/a   | n/a   | n/a   | 1.067 | n/a   | 1.662 | n/a   | 0.4256 |
| 3E+06 | 12 | 1 | 1 | 1 | 3.852  | n/a   | 10.454 | 4.333 | 3.879 | 6.328 | 3.159 | n/a   | n/a   | n/a   | 2.346 | n/a   | 1.775 | n/a   | 0.6628 |
| 3E+06 | 12 | 1 | 1 | 1 | 9.738  | n/a   | 8.34   | 3.561 | 3.013 | 5.035 | 2.313 | n/a   | n/a   | n/a   | 1.459 | n/a   | 1.437 | n/a   | 0.1881 |
| 3E+06 | 12 | 1 | 1 | 1 | 12.989 | n/a   | 12.188 | 3.961 | 3.657 | 6.188 | 2.837 | n/a   | n/a   | n/a   | 2.258 | n/a   | 2.115 | n/a   | 0.7287 |
| 3E+06 | 12 | 1 | 1 | 1 | 4.592  | n/a   | 10.704 | 3.528 | 3.702 | 7.121 | 4.057 | n/a   | n/a   | n/a   | 2.812 | n/a   | 2.138 | n/a   | 0.7821 |
| 3E+06 | 12 | 2 | 2 | 2 | 7.169  | 2.801 | 8.185  | 5.292 | 2.801 | 5.782 | 2.891 | 3.502 | 5.02  | 1.793 | 1.113 | 1.557 | 0.982 | 1.516 | 0.862  |
| 3E+06 | 12 | 1 | 1 | 1 | 3.506  | n/a   | 7.188  | 3.74  | 3.961 | 3.862 | 1.293 | n/a   | n/a   | n/a   | 1.515 | n/a   | 1.281 | n/a   | 0.0671 |
| 3E+06 | 12 | 1 | 1 | 1 | 5.007  | n/a   | 8.68   | 3.604 | 3.247 | 5.236 | 1.793 | n/a   | n/a   | n/a   | 0.852 | n/a   | 1.505 | n/a   | 0.1907 |
| 3E+06 | 12 | 1 | 1 | 1 | 11.262 | n/a   | 8.255  | 3.383 | 3.306 | 4.661 | 2.957 | n/a   | n/a   | n/a   | 1.14  | n/a   | 1.673 | n/a   | 0.1702 |
| 3E+06 | 12 | 1 | 1 | 1 | 11.631 | n/a   | 10.722 | 3.561 | 3.744 | 6.161 | 2.855 | n/a   | n/a   | n/a   | 1.955 | n/a   | 1.383 | n/a   | 0.5361 |
| 3E+06 | 12 | 1 | 1 | 1 | 8.448  | n/a   | 6.146  | 3.532 | 3.657 | 4.877 | 1.202 | n/a   | n/a   | n/a   | 0.499 | n/a   | 0.645 | n/a   | 0.0068 |
| 3E+06 | 13 | 1 | 1 | 1 | 5.466  | n/a   | 7.71   | 3.862 | 3.163 | 4.595 | 1.604 | n/a   | n/a   | n/a   | 1.447 | n/a   | 1.392 | n/a   | 0.1153 |
| 3E+06 | 13 | 1 | 1 | 1 | 6.275  | n/a   | 11.259 | 3.802 | 3.195 | 6.24  | 3.163 | n/a   | n/a   | n/a   | 2.281 | n/a   | 1.999 | n/a   | 0.7064 |
| 3E+06 | 13 | 2 | 2 | 2 | 7.484  | 3.913 | 6.432  | 3.688 | 4.009 | 7.569 | 3.702 | 3.702 | 4.822 | 1.076 | 2.163 | 1.143 | 2.638 | 1.194 | 0.8376 |
| 3E+06 | 13 | 1 | 1 | 1 | 4.266  | n/a   | 8.683  | 3.085 | 3.271 | 4.994 | 1.604 | n/a   | n/a   | n/a   | 1.531 | n/a   | 1.69  | n/a   | 0.2513 |
| 3E+06 | 13 | 1 | 1 | 1 | 5.674  | n/a   | 12.133 | 3.862 | 4.315 | 6.612 | 3.944 | n/a   | n/a   | n/a   | 1.992 | n/a   | 1.809 | n/a   | 0.6101 |
| 3E+06 | 13 | 1 | 1 | 1 | 9.791  | n/a   | 12.814 | 4.458 | 3.657 | 6.604 | 3.195 | n/a   | n/a   | n/a   | 1.961 | n/a   | 2.249 | n/a   | 0.7138 |
| 3E+06 | 13 | 1 | 1 | 1 | 6.555  | n/a   | 11.975 | 3.944 | 3.371 | 6.851 | 3.043 | n/a   | n/a   | n/a   | 1.944 | n/a   | 1.971 | n/a   | 0.6415 |
| 3E+06 | 13 | 1 | 1 | 1 | 7.791  | n/a   | 7.863  | 3.862 | 4.16  | 5.035 | 1.877 | n/a   | n/a   | n/a   | 1.107 | n/a   | 1.747 | n/a   | 0.1325 |
| 3E+06 | 13 | 1 | 2 | 1 | 2.51   | n/a   | 6.366  | 6.062 | 3.542 | 3.348 | 1.604 | n/a   | 3.73  | 4.197 | 2.305 | n/a   | 1.44  | 1.297 | 0.9123 |
| 3E+06 | 13 | 1 | 1 | 1 | 5.56   | n/a   | 11.202 | 4.11  | 4.318 | 6.246 | 1.793 | n/a   | n/a   | n/a   | 2.155 | n/a   | 2.06  | n/a   | 0.6954 |
| 3E+06 | 13 | 1 | 1 | 1 | 10.339 | n/a   | 8.115  | 3.961 | 3.636 | 5.094 | 1.951 | n/a   | n/a   | n/a   | 1.118 | n/a   | 1.596 | n/a   | 0.1525 |
| 3E+06 | 13 | 1 | 1 | 1 | 8.395  | n/a   | 10.872 | 3.085 | 3.043 | 4.675 | 2.054 | n/a   | n/a   | n/a   | 1.264 | n/a   | 1.612 | n/a   | 0.4317 |
| 3E+06 | 13 | 1 | 1 | 1 | 9.113  | n/a   | 8.613  | 3.043 | 2.948 | 5.164 | 2.085 | n/a   | n/a   | n/a   | 1.038 | n/a   | 1.18  | n/a   | 0.1677 |
| 3E+06 | 13 | 1 | 1 | 1 | 10.074 | n/a   | 7.441  | 3.915 | 3.409 | 4.974 | 1.828 | n/a   | n/a   | n/a   | 1.251 | n/a   | 1.423 | n/a   | 0.079  |
| 3E+06 | 13 | 1 | 1 | 1 | 4.648  | n/a   | 9.163  | 2.535 | 2.983 | 3.604 | 1.521 | n/a   | n/a   | n/a   | 0.675 | n/a   | 1.112 | n/a   | 0.2089 |
| 3E+06 | 13 | 1 | 1 | 1 | 6.35   | n/a   | 10.774 | 3.812 | 3.227 | 4.979 | 1.635 | n/a   | n/a   | n/a   | 0.856 | n/a   | 1.807 | n/a   | 0.4045 |
| 3E+06 | 13 | 1 | 1 | 1 | 4.754  | n/a   | 6.884  | 3.026 | 3.528 | 3.862 | 1.479 | n/a   | n/a   | n/a   | 0.844 | n/a   | 1.354 | n/a   | 0.0205 |
| 3E+06 | 13 | 1 | 1 | 1 | 10.348 | n/a   | 10.274 | 3.428 | 3.243 | 5.782 | 2.926 | n/a   | n/a   | n/a   | 1.481 | n/a   | 1.526 | n/a   | 0.4532 |
| 3E+06 | 13 | 1 | 1 | 1 | 6.299  | n/a   | 11.106 | 4.038 | 3.66  | 6.67  | 3.528 | n/a   | n/a   | n/a   | 1.713 | n/a   | 1.47  | n/a   | 0.5068 |
| 3E+06 | 13 | 1 | 1 | 1 | 14.592 | n/a   | 9.741  | 2.891 | 2.505 | 5.035 | 1.958 | n/a   | n/a   | n/a   | 1.165 | n/a   | 1.13  | n/a   | 0.295  |
| 3E+06 | 13 | 1 | 1 | 1 | 6.652  | n/a   | 11.089 | 3.114 | 3.432 | 5.181 | 1.931 | n/a   | n/a   | n/a   | 1.837 | n/a   | 1.609 | n/a   | 0.5525 |
| 3E+06 | 13 | 1 | 1 | 1 | 9.408  | n/a   | 8.549  | 2.74  | 2.944 | 4.234 | 1.521 | 2.891 | 3.983 | 1.727 | 1.047 | n/a   | 0.967 | n/a   | 0.1475 |
| 3E+06 | 13 | 1 | 1 | 1 | 8.385  | n/a   | 7.168  | 2.453 | 2.926 | 4.172 | 1.612 | n/a   | n/a   | n/a   | 0.966 | n/a   | 1.037 | n/a   | 0.039  |
| 3E+06 | 14 | 1 | 1 | 1 | 3.365  | n/a   | 7.377  | 3.849 | 1.924 | 4.012 | 1.612 | n/a   | n/a   | n/a   | 1.412 | n/a   | 1.248 | n/a   | 0.0766 |
| 3E+06 | 14 | 1 | 1 | 1 | 4.914  | n/a   | 7.252  | 4.403 | 2.926 | 4.209 | 2.268 | n/a   | n/a   | n/a   | 1.185 | n/a   | 1.423 | n/a   | 0.0624 |
| 3E+06 | 14 | 1 | 1 | 1 | 9.911  | n/a   | 9.219  | 4.209 | 3.961 | 5.613 | 2.505 | n/a   | n/a   | n/a   | 1.828 | n/a   | 2.203 | n/a   | 0.6521 |
| 3E+06 | 14 | 1 | 1 | 1 | 7.692  | n/a   | 5.221  | 6.227 | 2.157 | 2.489 | 1.931 | n/a   | n/a   | n/a   | 1.198 | n/a   | 1.763 | n/a   | 0.0023 |
| 3E+06 | 14 | 1 | 1 | 1 | 9.077  | n/a   | 9.787  | 3.454 | 3.227 | 6.106 | 2.591 | n/a   | n/a   | n/a   | 2.163 | n/a   | 1.355 | n/a   | 0.5726 |
| 3E+06 | 14 | 1 | 1 | 1 | 6.64   | n/a   | 10.614 | 3.223 | 3.618 | 4.853 | 2.313 | n/a   | n/a   | n/a   | 1.544 | n/a   | 1.85  | n/a   | 0.5459 |
| 3E+06 | 14 | 2 | 2 | 2 | 7.563  | 2.983 | 7.089  | 5.811 | 2.891 | 4.456 | 1.156 | 3.306 | 5.096 | 0.802 | 1.304 | 1.005 | 1.163 | 1.359 | 0.908  |
| 3E+06 | 14 | 1 | 1 | 1 | 0.802  | n/a   | 10.633 | 3.702 | 3.306 | 5.669 | 2.245 | n/a   | n/a   | n/a   | 1.157 | n/a   | 1.264 | n/a   | 0.372  |
| 3E+06 | 14 | 1 | 1 | 1 | 1.705  | n/a   | 10.886 | 4.683 | 3.402 | 5.966 | 2.726 | n/a   | n/a   | n/a   | 1.137 | n/a   | 1.34  | n/a   | 0.3896 |
| 3E+06 | 14 | 1 | 1 | 1 | 6.195  | n/a   | 9.787  | 3.371 | 2.731 | 5.379 | 2.109 | n/a   | n/a   | n/a   | 2.819 | n/a   | 1.728 | n/a   | 0.7978 |
| 3E+06 | 14 | 1 | 1 | 0 | n/a    | n/a   | 9.866  | 4.749 | 3.223 | 6.094 | 2.731 | n/a   | n/a   | n/a   | 2.583 | n/a   | 2.08  | n/a   | 0.8017 |
| 3E+06 | 14 | 1 | 1 | 0 | n/a    | n/a   | 9.692  | 3.882 | 3.882 | 5.485 | 2.313 | n/a   | n/a   | n/a   | 1.182 | n/a   | 1.656 | n/a   | 0.343  |
| 3E+06 | 14 | 1 | 1 | 2 | 5.208  | 1.612 | 10.097 | 3.159 | 2.801 | 5.134 | 2.891 | n/a   | n/a   | n/a   | 1.797 | n/a   | 2.205 | n/a   | 0.6485 |
| 3E+06 | 14 | 1 | 1 | 1 | 4.16   | n/a   | 6.011  | 3.183 | 2.535 | 3.114 | 0.935 | n/a   | n/a   | n/a   | 0.689 | n/a   | 1.328 | n/a   | 0.0091 |
| 3E+06 | 14 | 1 | 1 | 1 | 5.919  | n/a   | 9.754  | 3.026 | 3.586 | 5.613 | 2.759 | n/a   | n/a   | n/a   | 0.818 | n/a   | 0.93  | n/a   | 0.2703 |
| 3E+06 | 14 | 1 | 1 | 1 | 12.774 | n/a   | 10.002 | 3.402 | 3.097 | 4.098 | 2.405 | n/a   | n/a   | n/a   | 0.779 | n/a   | 1.337 | n/a   | 0.3006 |
| 3E+06 | 14 | 1 | 1 | 1 | 3.586  | n/a   | 9.571  | 3.383 | 2.586 | 5.331 | 2.51  | n/a   | n/a   | n/a   | 1.028 | n/a   | 1.139 | n/a   | 0.2676 |
| 3E+06 | 14 | 1 | 1 | 1 | 7.605  | n/a   | 9.438  | 3.151 | 2.801 | 5.601 | 1.958 | n/a   | n/a   | n/a   | 1.509 | n/a   | 1.132 | n/a   | 0.2978 |
| 3E+06 | 14 | 1 | 1 | 1 | 7.249  | n/a   | 8.297  | 4.234 | 2.61  | 4.315 | 1.379 | n/a   | n/a   | n/a   | 1.233 | n/a   | 1.369 | n/a   | 0.1651 |
| 3E+06 | 14 | 2 | 2 | 2 | 5.265  | 2.296 | 6.957  | 5.61  | 2.61  | 3.915 | 0.818 | 3.744 | 4.661 | 0.802 | 1.098 | 1.228 | 1.213 | 0.987 | 0.9294 |
| 3E+06 | 14 | 1 | 2 | 2 | 9.676  | 2.775 | 7.864  | 6.272 | 3.013 | 4.501 | 2.586 | n/a   | 4.661 | 2.384 | 1.988 | n/a   | 1.109 | 1.226 | 0.9424 |
| 3E+06 | 14 | 2 | 2 | 2 | 5.196  | 2.232 | 7.706  | 5.601 | 3.227 | 4.805 | 1.479 | 3.151 | 5.141 | 1.951 | 0.875 | 1.946 | 1.283 | 1.019 | 0.887  |
| 3E+06 | 15 | 1 | 1 | 1 | 8.103  | n/a   | 12.09  | 3.306 | 3.163 | 5.737 | 3.175 | n/a   | n/a   | n/a   | 1.218 | n/a   | 1.37  | n/a   | 0.4287 |
| 3E+06 | 15 | 1 | 1 | 1 | 6.932  | n/a   | 9.77   | 3.454 | 3.207 | 5.094 | 4.022 | n/a   | n/a   | n/a   | 0.978 | n/a   | 1.233 | n/a   | 0.2895 |
| 3E+06 | 15 | 1 | 1 | 1 | 9.898  | n/a   | 9.947  | 3.306 | 3.114 | 5.445 | 3.688 | n/a   | n/a   | n/a   | 0.936 | n/a   | 1.569 | n/a   | 0.3401 |
| 3E+06 | 15 | 2 | 2 | 2 | 7.758  | 1.156 | 6.592  | 5.34  | 3.852 | 4.824 | 1.156 | 3.29  | 3.586 | 1.322 | 0.869 | 0.97  | 0.764 | 1.083 | 0.9643 |
| 3E+06 | 15 | 1 | 1 | 1 | 6.532  | n/a   | 10.271 | 2.891 | 2.842 | 5.578 | 2.586 | n/a   | n/a   | n/a   | 1.293 | n/a   | 1.16  | n/a   | 0.3574 |
| 3E+06 | 15 | 2 | 2 | 2 | 7.381  | 3.552 | 7.921  | 6.766 | 3.74  | 4.261 | 1.322 | 3.223 | 3.812 | 0.864 | 1.285 | 1.428 | 1.24  | 1.178 | 0.8745 |

|       |    |   |   |   |        |       |        |       |       |       |       |       |       |       |       |       |       |       |        |
|-------|----|---|---|---|--------|-------|--------|-------|-------|-------|-------|-------|-------|-------|-------|-------|-------|-------|--------|
| 3E+06 | 15 | 1 | 1 | 1 | 5.394  | n/a   | 10.97  | 4.138 | 3.195 | 5.309 | 2.759 | n/a   | n/a   | n/a   | 2.276 | n/a   | 2.123 | n/a   | 0.7212 |
| 3E+06 | 15 | 1 | 1 | 1 | 8.457  | n/a   | 12.681 | 4.16  | 3.73  | 5.896 | 2.805 | n/a   | n/a   | n/a   | 1.861 | n/a   | 1.915 | n/a   | 0.6066 |
| 3E+06 | 15 | 1 | 1 | 1 | 3.331  | n/a   | 7.539  | 3.026 | 2.869 | 4.303 | 1.705 | n/a   | n/a   | n/a   | 1.021 | n/a   | 1.214 | n/a   | 0.0695 |
| 3E+06 | 15 | 1 | 1 | 1 | 9.911  | n/a   | 10.662 | 2.768 | 2.886 | 4.94  | 2.151 | n/a   | n/a   | n/a   | 1.073 | n/a   | 1.519 | n/a   | 0.3956 |
| 3E+06 | 15 | 1 | 1 | 0 | n/a    | n/a   | 7.123  | 4.94  | 3.306 | 4.088 | 1.076 | n/a   | n/a   | n/a   | 0.938 | n/a   | 1.169 | n/a   | 0.0366 |
| 3E+06 | 15 | 1 | 1 | 1 | 12.492 | n/a   | 10.863 | 3.409 | 2.869 | 6.612 | 3.247 | n/a   | n/a   | n/a   | 1.834 | n/a   | 1.732 | n/a   | 0.5759 |
| 3E+06 | 15 | 1 | 1 | 1 | 3.064  | n/a   | 7.598  | 2.886 | 2.996 | 4.835 | 1.604 | n/a   | n/a   | n/a   | 1.108 | n/a   | 1.521 | n/a   | 0.1007 |
| 3E+06 | 15 | 1 | 1 | 1 | 7.496  | n/a   | 10.623 | 4.447 | 3.402 | 4.877 | 2.14  | n/a   | n/a   | n/a   | 1.668 | n/a   | 1.977 | n/a   | 0.5827 |
| 3E+06 | 15 | 1 | 1 | 2 | 10.578 | 1.635 | 8.537  | 5.023 | 3.528 | 4.218 | 1.604 | n/a   | n/a   | n/a   | 2.596 | n/a   | 2.223 | n/a   | 0.8662 |
| 3E+06 | 15 | 1 | 1 | 1 | 11.295 | n/a   | 8.856  | 2.731 | 2.688 | 4.009 | 0.962 | n/a   | n/a   | n/a   | 1.07  | n/a   | 1.011 | n/a   | 0.2011 |
| 3E+06 | 15 | 1 | 1 | 1 | 3.764  | n/a   | 10.163 | 2.944 | 3.692 | 5.71  | 2.688 | n/a   | n/a   | n/a   | 1.52  | n/a   | 1.641 | n/a   | 0.494  |
| 3E+06 | 15 | 1 | 1 | 2 | 4.179  | 1.322 | 8.68   | 4.885 | 3.227 | 4.909 | 1.793 | n/a   | n/a   | n/a   | 2.518 | n/a   | 1.708 | n/a   | 0.938  |
| 3E+06 | 16 | 1 | 1 | 1 | 0.661  | n/a   | 8.595  | 3.271 | 2.837 | 5.275 | 2.566 | n/a   | n/a   | n/a   | 1.593 | n/a   | 1.449 | n/a   | 0.2247 |
| 3E+06 | 16 | 1 | 1 | 1 | 8.717  | n/a   | 9.829  | 3.371 | 2.768 | 4.197 | 2.957 | n/a   | n/a   | n/a   | 1.78  | n/a   | 1.727 | n/a   | 0.5692 |
| 3E+06 | 16 | 1 | 1 | 2 | 8.569  | 2.335 | 11.059 | 4.057 | 3.163 | 4.209 | 1.735 | n/a   | n/a   | n/a   | 1.682 | n/a   | 2.476 | n/a   | 0.6881 |
| 3E+06 | 16 | 1 | 1 | 1 | 6.718  | n/a   | 10.906 | 4.172 | 3.247 | 6.897 | 3.398 | n/a   | n/a   | n/a   | 2.414 | n/a   | 1.691 | n/a   | 0.6664 |
| 3E+06 | 16 | 1 | 1 | 1 | 4.913  | n/a   | 7.371  | 4.197 | 2.731 | 4.456 | 0.864 | n/a   | n/a   | n/a   | 1.12  | n/a   | 1.23  | n/a   | 0.0647 |
| 3E+06 | 16 | 1 | 1 | 1 | 3.368  | n/a   | 8.203  | 4.009 | 3.114 | 5.615 | 2.586 | n/a   | n/a   | n/a   | 1.73  | n/a   | 2.146 | n/a   | 0.9599 |
| 3E+06 | 16 | 2 | 2 | 2 | 10.287 | 1.938 | 7.188  | 5.811 | 3.754 | 3.902 | 1.434 | 3.561 | 4.516 | 1.443 | 1.259 | 0.782 | 1.818 | 1.151 | 0.8996 |
| 3E+06 | 16 | 1 | 1 | 2 | 7.062  | 1.727 | 7.757  | 4.49  | 2.957 | 5.536 | 1.931 | n/a   | n/a   | n/a   | 1.957 | n/a   | 2.238 | n/a   | 0.9555 |
| 3E+06 | 16 | 1 | 1 | 1 | 10.417 | n/a   | 10.801 | 3.532 | 3.247 | 3.983 | 2.335 | n/a   | n/a   | n/a   | 1.037 | n/a   | 1.703 | n/a   | 0.4226 |
| 3E+06 | 16 | 1 | 1 | 1 | 3.517  | n/a   | 7.757  | 3.532 | 2.801 | 3.961 | 1.674 | n/a   | n/a   | n/a   | 1.674 | n/a   | 1.658 | n/a   | 0.1601 |
| 3E+06 | 16 | 1 | 1 | 1 | 5.801  | n/a   | 9.252  | 3.517 | 2.726 | 5.164 | 2.109 | n/a   | n/a   | n/a   | 1.718 | n/a   | 1.968 | n/a   | 0.5861 |
| 3E+06 | 16 | 1 | 1 | 1 | 7.921  | n/a   | 11.001 | 3.825 | 3.013 | 4.661 | 2.443 | n/a   | n/a   | n/a   | 1.822 | n/a   | 1.671 | n/a   | 0.5592 |
| 3E+06 | 16 | 1 | 1 | 1 | 1.931  | n/a   | 7.387  | 3.163 | 3.586 | 4.261 | 1.764 | n/a   | n/a   | n/a   | 0.986 | n/a   | 1.232 | n/a   | 0.06   |
| 3E+06 | 16 | 1 | 1 | 1 | 6.81   | n/a   | 10.895 | 3.432 | 3.744 | 6.414 | 4.209 | n/a   | n/a   | n/a   | 1.883 | n/a   | 2.277 | n/a   | 0.6808 |
| 3E+06 | 16 | 1 | 1 | 1 | 6.353  | n/a   | 11.259 | 4.447 | 3.657 | 4.824 | 1.076 | n/a   | n/a   | n/a   | 1.384 | n/a   | 1.865 | n/a   | 0.523  |
| 3E+06 | 16 | 1 | 1 | 1 | 7.757  | n/a   | 10.734 | 3.586 | 3.383 | 5.793 | 3.207 | n/a   | n/a   | n/a   | 1.948 | n/a   | 1.515 | n/a   | 0.5559 |
| 3E+06 | 16 | 1 | 1 | 1 | 7.84   | n/a   | 11.564 | 3.502 | 3.882 | 6.188 | 2.926 | n/a   | n/a   | n/a   | 2.357 | n/a   | 2.324 | n/a   | 0.7476 |
| 3E+06 | 16 | 1 | 1 | 1 | 13.251 | n/a   | 12.718 | 3.223 | 3.371 | 5.352 | 2.74  | n/a   | n/a   | n/a   | 3.001 | n/a   | 2.011 | n/a   | 0.7667 |
| 3E+06 | 16 | 1 | 1 | 1 | 2.964  | n/a   | 8.907  | 3.66  | 3.521 | 4.38  | 1.076 | n/a   | n/a   | n/a   | 1.638 | n/a   | 1.191 | n/a   | 0.2486 |
| 3E+06 | 17 | 1 | 1 | 1 | 3.163  | n/a   | 9.016  | 2.948 | 2.448 | 4.527 | 2.313 | n/a   | n/a   | n/a   | 0.826 | n/a   | 1.784 | n/a   | 0.246  |
| 3E+06 | 17 | 1 | 1 | 1 | 9.625  | n/a   | 11.45  | 3.383 | 4.057 | 6.598 | 3.163 | n/a   | n/a   | n/a   | 2.611 | n/a   | 2.304 | n/a   | 0.7783 |
| 3E+06 | 17 | 1 | 1 | 1 | 3.664  | n/a   | 8.196  | 4.182 | 3.517 | 5.485 | 2.411 | n/a   | n/a   | n/a   | 1.548 | n/a   | 1.714 | n/a   | 0.1959 |
| 3E+06 | 17 | 1 | 1 | 1 | 4.333  | n/a   | 6.454  | 3.657 | 3.469 | 4.768 | 1.252 | n/a   | n/a   | n/a   | 1.227 | n/a   | 1.636 | n/a   | 0.9511 |
| 3E+06 | 17 | 1 | 1 | 1 | 1.579  | n/a   | 7.897  | 2.891 | 2.957 | 4.172 | 2.181 | n/a   | n/a   | n/a   | 1.35  | n/a   | 1.681 | n/a   | 0.145  |
| 3E+06 | 17 | 1 | 1 | 1 | 0.962  | n/a   | 6.464  | 4.683 | 2.279 | 3.097 | 1.771 | n/a   | n/a   | n/a   | 1.254 | n/a   | 1.386 | n/a   | 0.0159 |
| 3E+06 | 17 | 1 | 1 | 1 | 4.932  | n/a   | 8.971  | 3.08  | 3.183 | 6.822 | 2.427 | n/a   | n/a   | n/a   | 1.429 | n/a   | 1.331 | n/a   | 0.254  |
| 3E+06 | 17 | 1 | 1 | 1 | 9.351  | n/a   | 11.115 | 4.197 | 3.371 | 5.916 | 2.759 | n/a   | n/a   | n/a   | 1.264 | n/a   | 1.658 | n/a   | 0.4625 |
| 3E+06 | 17 | 1 | 1 | 2 | 9.589  | 1.828 | 10.066 | 3.337 | 3.532 | 5.831 | 2.411 | n/a   | n/a   | n/a   | 2.361 | n/a   | 2.205 | n/a   | 0.7514 |
| 3E+06 | 17 | 1 | 1 | 0 | n/a    | n/a   | 7.975  | 4.516 | 2.801 | 4.49  | 1.735 | n/a   | n/a   | n/a   | 1.549 | n/a   | 1.734 | n/a   | 0.1804 |
| 3E+06 | 17 | 1 | 1 | 1 | 4.023  | n/a   | 8.037  | 4.169 | 2.405 | 4.009 | 1.735 | n/a   | n/a   | n/a   | 1.505 | n/a   | 1.434 | n/a   | 0.1626 |
| 3E+06 | 17 | 1 | 1 | 1 | 2.948  | n/a   | 7.549  | 4.057 | 2.688 | 3.517 | 1.283 | n/a   | n/a   | n/a   | 1.585 | n/a   | 1.397 | n/a   | 0.1128 |
| 3E+06 | 17 | 1 | 1 | 1 | 10.306 | n/a   | 11.055 | 3.55  | 3.114 | 4.022 | 2.028 | n/a   | n/a   | n/a   | 1.368 | n/a   | 1.275 | n/a   | 0.4135 |
| 3E+06 | 17 | 1 | 1 | 1 | 3.993  | n/a   | 9.538  | 4.019 | 4.628 | 6.464 | 1.635 | n/a   | n/a   | n/a   | 1.415 | n/a   | 1.741 | n/a   | 0.4909 |
| 3E+06 | 17 | 1 | 1 | 1 | 7.77   | n/a   | 9.282  | 3.702 | 3.97  | 5.914 | 2.586 | n/a   | n/a   | n/a   | 2.665 | n/a   | 1.958 | n/a   | 0.8296 |
| 3E+06 | 17 | 1 | 1 | 1 | 7.892  | n/a   | 10.697 | 4.06  | 3.051 | 6.925 | 3.774 | n/a   | n/a   | n/a   | 1.848 | n/a   | 2.087 | n/a   | 0.6309 |
| 3E+06 | 17 | 1 | 1 | 1 | 8.158  | n/a   | 12.656 | 4.538 | 4.169 | 5.936 | 2.74  | n/a   | n/a   | n/a   | 1.74  | n/a   | 2.78  | n/a   | 0.74   |
| 3E+06 | 17 | 1 | 1 | 1 | 8.603  | n/a   | 7.764  | 4.107 | 3.862 | 5.134 | 2.505 | n/a   | n/a   | n/a   | 1.859 | n/a   | 1.199 | n/a   | 0.135  |
| 3E+06 | 17 | 1 | 1 | 1 | 13.424 | n/a   | 7.357  | 3.348 | 2.688 | 3.852 | 1.651 | n/a   | n/a   | n/a   | 1.108 | n/a   | 1.094 | n/a   | 0.053  |
| 3E+06 | 17 | 1 | 1 | 1 | 14.11  | n/a   | 10.233 | 3.306 | 2.443 | 5.448 | 3.195 | n/a   | n/a   | n/a   | 0.992 | n/a   | 1.387 | n/a   | 0.3487 |
| 3E+06 | 18 | 1 | 1 | 1 | 6.028  | n/a   | 10.434 | 3.692 | 3.618 | 4.516 | 1.814 | n/a   | n/a   | n/a   | 1.348 | n/a   | 1.289 | n/a   | 0.3837 |
| 3E+06 | 18 | 1 | 1 | 2 | 8.071  | 3.302 | 7.864  | 4.493 | 2.768 | 4.123 | 1.771 | n/a   | n/a   | n/a   | 1.496 | n/a   | 2.01  | n/a   | 0.9467 |
| 3E+06 | 18 | 1 | 1 | 1 | 8.708  | n/a   | 9.083  | 3.915 | 3.409 | 5.916 | 2.091 | n/a   | n/a   | n/a   | 1.603 | n/a   | 1.499 | n/a   | 0.3034 |
| 3E+06 | 18 | 1 | 1 | 1 | 7.332  | n/a   | 13.952 | 3.175 | 3.302 | 5.567 | 2.448 | n/a   | n/a   | n/a   | 1.98  | n/a   | 2.182 | n/a   | 0.7101 |
| 3E+06 | 18 | 2 | 2 | 2 | 5.937  | 2.934 | 7.223  | 5.688 | 3.114 | 3.657 | 1.727 | 2.009 | 3.561 | 1.076 | 1.282 | 1.574 | 1.361 | 1.351 | 0.8828 |
| 3E+06 | 18 | 1 | 1 | 1 | 4.907  | n/a   | 6.925  | 3.785 | 2.384 | 3.469 | 1.361 | n/a   | n/a   | n/a   | 1.189 | n/a   | 1.216 | n/a   | 0.0274 |
| 3E+06 | 18 | 1 | 2 | 2 | 10.515 | 3.517 | 5.522  | 2.61  | 5.221 | 2.296 | 2.58  | n/a   | 4.541 | 2.251 | 2.58  | n/a   | 1.197 | 1.203 | 0.8911 |
| 3E+06 | 18 | 1 | 1 | 1 | 9.847  | n/a   | 7.392  | 4.182 | 3.915 | 3.879 | 1.951 | n/a   | n/a   | n/a   | 1.37  | n/a   | 1.252 | n/a   | 0.0742 |
| 3E+06 | 18 | 1 | 1 | 1 | 7.371  | n/a   | 10.676 | 3.469 | 3.026 | 7.539 | 4.138 | n/a   | n/a   | n/a   | 1.872 | n/a   | 2.03  | n/a   | 0.6239 |
| 3E+06 | 18 | 1 | 1 | 1 | 9.228  | n/a   | 7.028  | 3.983 | 2.957 | 3.657 | 1.027 | n/a   | n/a   | n/a   | 1.147 | n/a   | 1.06  | n/a   | 0.0297 |
| 3E+06 | 18 | 1 | 1 | 1 | 0.453  | n/a   | 9.397  | 3.785 | 3.692 | 5.71  | 2.586 | n/a   | n/a   | n/a   | 2.58  | n/a   | 2.241 | n/a   | 0.8256 |
| 3E+06 | 18 | 1 | 1 | 1 | 6.342  | n/a   | 12.079 | 2.904 | 3.657 | 6.328 | 2.904 | n/a   | n/a   | n/a   | 1.999 | n/a   | 2.14  | n/a   | 0.6917 |
| 3E+06 | 18 | 1 | 1 | 2 | 5.055  | 1.027 | 9.494  | 4.467 | 2.891 | 4.768 | 2.151 | n/a   | n/a   | n/a   | 3.016 | n/a   | 2.762 | n/a   | 0.8096 |
| 3E+06 | 18 | 1 | 1 | 2 | 9.464  | 1.252 | 9.707  | 3.774 | 2.74  | 5.314 | 1.604 | n/a   | n/a   | n/a   | 2.308 | n/a   | 2.41  | n/a   | 0.8136 |

|       |    |   |   |   |        |       |        |       |       |       |       |       |       |       |       |       |        |       |        |
|-------|----|---|---|---|--------|-------|--------|-------|-------|-------|-------|-------|-------|-------|-------|-------|--------|-------|--------|
| 3E+06 | 18 | 1 | 1 | 1 | 8.871  | n/a   | 12.929 | 3.08  | 2.726 | 5.613 | 3.114 | n/a   | n/a   | n/a   | 1.137 | n/a   | 1.481  | n/a   | 0.4501 |
| 5E+06 | 1  | 1 | 1 | 1 | 12.558 | n/a   | 11.029 | 2.453 | 2.489 | 4.377 | 2.448 | n/a   | n/a   | n/a   | 1.929 | n/a   | 2.215  | n/a   | 0.6755 |
| 5E+06 | 1  | 1 | 1 | 1 | 5.947  | n/a   | 8.681  | 2.427 | 3.085 | 4.628 | 1.771 | n/a   | n/a   | n/a   | 0.844 | n/a   | 1.355  | n/a   | 0.2387 |
| 5E+06 | 1  | 1 | 1 | 1 | 5.727  | n/a   | 6.398  | 3.402 | 3.047 | 3.812 | 1.434 | n/a   | n/a   | n/a   | 1.239 | n/a   | 1.096  | n/a   | 0.0429 |
| 5E+06 | 1  | 2 | 2 | 2 | 8.457  | 2.731 | 6.543  | 5.536 | 1.793 | 3.047 | 1.293 | 2.296 | 3.247 | 1.221 | 1.193 | 1.472 | 1.119  | 1.111 | 0.9058 |
| 5E+06 | 1  | 1 | 1 | 1 | 7.711  | n/a   | 7.785  | 2.586 | 2.654 | 4.675 | 2.711 | n/a   | n/a   | n/a   | 0.743 | n/a   | 1.102  | n/a   | 0.1492 |
| 5E+06 | 1  | 1 | 1 | 1 | 6.541  | n/a   | 6.487  | 2.028 | 2.181 | 3.195 | 1.014 | n/a   | n/a   | n/a   | 0.774 | n/a   | 1.233  | n/a   | 0.0408 |
| 5E+06 | 1  | 1 | 1 | 1 | 9.903  | n/a   | 9.67   | 2.489 | 3.026 | 5.236 | 2.51  | n/a   | n/a   | n/a   | 1.258 | n/a   | 1.611  | n/a   | 0.3341 |
| 5E+06 | 1  | 1 | 1 | 1 | 10.627 | n/a   | 8.38   | 2.891 | 2.63  | 3.66  | 1.793 | n/a   | n/a   | n/a   | 1.345 | n/a   | 1.082  | n/a   | 0.2189 |
| 5E+06 | 1  | 1 | 1 | 1 | 8.79   | n/a   | 10.896 | 2.181 | 2.768 | 4.919 | 2.51  | n/a   | n/a   | n/a   | 1.113 | n/a   | 1.321  | n/a   | 0.383  |
| 5E+06 | 1  | 2 | 2 | 2 | 4.536  | 1.969 | 6.106  | 5.096 | 2.335 | 3.542 | 1.283 | 2.384 | 3.855 | 1.134 | 0.747 | 0.968 | 1.335  | 1.016 | 1      |
| 5E+06 | 1  | 2 | 2 | 2 | 10.988 | 4.098 | 7.261  | 4.76  | 2.855 | 3.73  | 1.221 | 2.948 | 4.06  | 1.37  | 0.782 | 0.656 | 0.962  | 1.269 | 0.9958 |
| 5E+06 | 1  | 1 | 1 | 1 | 11.38  | n/a   | 10.654 | 2.745 | 3.207 | 4.49  | 1.931 | n/a   | n/a   | n/a   | 1.244 | n/a   | 1.074  | n/a   | 0.3583 |
| 5E+06 | 1  | 1 | 1 | 1 | 7.462  | n/a   | 11.102 | 2.731 | 3.243 | 6.045 | 2.855 | n/a   | n/a   | n/a   | 0.906 | n/a   | 1.175  | n/a   | 0.3556 |
| 5E+06 | 1  | 1 | 1 | 1 | 7.094  | n/a   | 10.875 | 2.535 | 3.517 | 6.138 | 2.842 | n/a   | n/a   | n/a   | 1.603 | n/a   | 1.946  | n/a   | 0.5839 |
| 5E+06 | 1  | 1 | 1 | 0 | 6.152  | n/a   | 6.408  | 3.114 | 2.745 | 3.636 | 1.764 | n/a   | n/a   | n/a   | 0.854 | n/a   | 0.906  | n/a   | 0.0256 |
| 5E+06 | 1  | 1 | 2 | 2 | 4.419  | 0.661 | 7.872  | 4.877 | 2.805 | 3.879 | 1.735 | n/a   | 4.458 | 1.931 | 1.698 | n/a   | 1.257  | 0.973 | 0.9916 |
| 5E+06 | 1  | 1 | 1 | 1 | 7.512  | n/a   | 9.648  | 3.097 | 2.571 | 4.473 | 2.313 | n/a   | n/a   | n/a   | 0.765 | n/a   | 1.014  | n/a   | 0.2999 |
| 5E+06 | 1  | 1 | 1 | 1 | 8.06   | n/a   | 9.981  | 2.869 | 2.745 | 5.289 | 2.944 | n/a   | n/a   | n/a   | 1.343 | n/a   | 1.782  | n/a   | 0.4888 |
| 5E+06 | 1  | 1 | 1 | 1 | 9.962  | n/a   | 8.787  | 2.51  | 2.51  | 4.749 | 2.091 | n/a   | n/a   | n/a   | 0.951 | n/a   | 0.838  | n/a   | 0.2164 |
| 5E+06 | 1  | 1 | 1 | 2 | 7.588  | 1.814 | 7.441  | 4.683 | 2.51  | 4.098 | 1.705 | n/a   | n/a   | n/a   | 1.819 | n/a   | 2.266  | n/a   | 0.9874 |
| 5E+06 | 1  | 1 | 1 | 1 | 10.174 | n/a   | 7.864  | 2.74  | 2.731 | 3.618 | 1.252 | n/a   | n/a   | n/a   | 1.214 | n/a   | 0.85   | n/a   | 0.1586 |
| 5E+06 | 1  | 1 | 1 | 1 | 12.538 | n/a   | 13.265 | 3.114 | 2.768 | 5.455 | 3.064 | n/a   | n/a   | n/a   | 2.292 | n/a   | 1.856  | n/a   | 0.7028 |
| 5E+06 | 2  | 1 | 1 | 1 | 7.128  | n/a   | 11.354 | 2.948 | 3.08  | 5.742 | 2.801 | n/a   | n/a   | n/a   | 1.945 | n/a   | 2.033  | n/a   | 0.6521 |
| 5E+06 | 2  | 1 | 1 | 1 | 10.813 | n/a   | 8.893  | 2.181 | 2.948 | 3.306 | 1.479 | n/a   | n/a   | n/a   | 1.263 | n/a   | 1.345  | n/a   | 0.2843 |
| 5E+06 | 2  | 1 | 1 | 1 | 10.455 | n/a   | 10.691 | 3.013 | 2.948 | 4.768 | 2.688 | n/a   | n/a   | n/a   | 2.613 | n/a   | 2.169  | n/a   | 0.7916 |
| 5E+06 | 2  | 1 | 2 | 2 | 6.62   | 3.05  | 6.766  | 4.981 | 2.983 | 4.561 | 1.735 | n/a   | 4.458 | 2.151 | 2.895 | n/a   | 0.923  | 1.019 | 0.9098 |
| 5E+06 | 2  | 1 | 1 | 1 | 10.046 | n/a   | 6.301  | 3.306 | 3.306 | 3.983 | 1.134 | n/a   | n/a   | n/a   | 1.128 | n/a   | 0.975  | n/a   | 0.0235 |
| 5E+06 | 2  | 1 | 2 | 2 | 5.725  | 3.432 | 6.683  | 5.033 | 2.495 | 3.064 | 2.091 | n/a   | 3.915 | 1.938 | 1.784 | n/a   | 1.627  | 1.101 | 0.942  |
| 5E+06 | 2  | 1 | 1 | 1 | 12.211 | n/a   | 11.097 | 3.08  | 2.801 | 4.424 | 1.727 | n/a   | n/a   | n/a   | 1.418 | n/a   | 1.284  | n/a   | 0.408  |
| 5E+06 | 2  | 1 | 1 | 1 | 20.724 | n/a   | 13.271 | 3.383 | 3.207 | 6.127 | 2.535 | n/a   | n/a   | n/a   | 2.647 | n/a   | 2.809  | n/a   | 0.777  |
| 5E+06 | 2  | 1 | 1 | 1 | 5.64   | n/a   | 6.013  | 3.08  | 2.63  | 3.432 | 1.579 | n/a   | n/a   | n/a   | 1.275 | n/a   | 1.07   | n/a   | 0.0127 |
| 5E+06 | 2  | 1 | 1 | 1 | 4.896  | n/a   | 7.779  | 3.051 | 3.183 | 4.719 | 2.368 | n/a   | n/a   | n/a   | 1.381 | n/a   | 1.414  | n/a   | 0.1896 |
| 5E+06 | 2  | 1 | 1 | 1 | 16.142 | n/a   | 14.01  | 3.692 | 2.842 | 4.909 | 2.489 | n/a   | n/a   | n/a   | 1.611 | n/a   | 2.063  | n/a   | 0.5807 |
| 5E+06 | 2  | 1 | 1 | 1 | 5.071  | n/a   | 7.459  | 3.195 | 2.855 | 3.517 | 1.521 | n/a   | n/a   | n/a   | 1.413 | n/a   | 1.117  | n/a   | 0.1422 |
| 5E+06 | 2  | 1 | 1 | 1 | 8.376  | n/a   | 11.381 | 2.855 | 3.114 | 5.388 | 2.61  | n/a   | n/a   | n/a   | 2.442 | n/a   | 0.7734 | n/a   | 0.2734 |
| 5E+06 | 2  | 1 | 1 | 1 | 1.793  | n/a   | 9.912  | 3.72  | 2.61  | 4.362 | 1.828 | n/a   | n/a   | n/a   | 1.569 | n/a   | 1.63   | n/a   | 0.5067 |
| 5E+06 | 2  | 1 | 1 | 1 | 12.051 | n/a   | 8.288  | 2.745 | 2.669 | 4.088 | 1.983 | n/a   | n/a   | n/a   | 1.057 | n/a   | 1.402  | n/a   | 0.2115 |
| 5E+06 | 2  | 1 | 1 | 1 | 5.708  | n/a   | 6.495  | 3.195 | 2.411 | 3.618 | 0.935 | n/a   | n/a   | n/a   | 1.519 | n/a   | 1.04   | n/a   | 0.0649 |
| 5E+06 | 2  | 1 | 1 | 1 | 4.354  | n/a   | 6.962  | 3.443 | 2.842 | 3.409 | 1.283 | n/a   | n/a   | n/a   | 0.912 | n/a   | 1.144  | n/a   | 0.0872 |
| 5E+06 | 2  | 1 | 1 | 1 | 8.414  | n/a   | 10.292 | 3.085 | 3.085 | 5.426 | 2.384 | n/a   | n/a   | n/a   | 1.539 | n/a   | 1.864  | n/a   | 0.5588 |
| 5E+06 | 2  | 1 | 1 | 1 | 12.079 | n/a   | 11.231 | 3.744 | 2.801 | 4.592 | 2.009 | n/a   | n/a   | n/a   | 1.138 | n/a   | 1.382  | n/a   | 0.3996 |
| 5E+06 | 2  | 1 | 1 | 1 | 9.659  | n/a   | 9.99   | 2.384 | 2.891 | 5.204 | 1.793 | n/a   | n/a   | n/a   | 1.081 | n/a   | 1.155  | n/a   | 0.3209 |
| 5E+06 | 2  | 1 | 1 | 1 | 6.887  | n/a   | 11.376 | 2.759 | 3.306 | 5.164 | 2.181 | n/a   | n/a   | n/a   | 2.197 | n/a   | 2.031  | n/a   | 0.6857 |
| 5E+06 | 2  | 1 | 1 | 1 | 8.011  | n/a   | 10.884 | 2.886 | 3.383 | 5.096 | 1.877 | n/a   | n/a   | n/a   | 1.434 | n/a   | 1.343  | n/a   | 0.4164 |
| 5E+06 | 2  | 1 | 1 | 1 | 7.166  | n/a   | 8.639  | 3.247 | 3.432 | 4.661 | 1.479 | n/a   | n/a   | n/a   | 1.068 | n/a   | 1.28   | n/a   | 0.2462 |
| 5E+06 | 2  | 1 | 1 | 1 | 6.912  | n/a   | 10.11  | 3.064 | 2.731 | 4.564 | 2.335 | n/a   | n/a   | n/a   | 1.812 | n/a   | 1.855  | n/a   | 0.5998 |
| 5E+06 | 2  | 1 | 1 | 1 | 10.454 | n/a   | 10.809 | 3.08  | 2.996 | 5.236 | 2.313 | n/a   | n/a   | n/a   | 2.041 | n/a   | 1.941  | n/a   | 0.6488 |
| 5E+06 | 3  | 1 | 1 | 1 | 7.209  | n/a   | 9.78   | 2.768 | 2.63  | 5.289 | 2.571 | n/a   | n/a   | n/a   | 1.769 | n/a   | 1.413  | n/a   | 0.5037 |
| 5E+06 | 3  | 2 | 2 | 2 | 7.838  | 2.547 | 6.886  | 5.39  | 3.183 | 3.852 | 1.283 | 3.064 | 4.558 | 1.434 | 1.237 | 1.657 | 1.04   | 0.842 | 0.9138 |
| 5E+06 | 3  | 1 | 1 | 1 | 9.854  | n/a   | 15.157 | 3.744 | 3.227 | 6.384 | 3.337 | n/a   | n/a   | n/a   | 1.8   | n/a   | 2.019  | n/a   | 0.6722 |
| 5E+06 | 3  | 1 | 1 | 1 | 14.039 | n/a   | 11.356 | 2.251 | 2.63  | 5.033 | 2.411 | n/a   | n/a   | n/a   | 1.524 | n/a   | 1.338  | n/a   | 0.4536 |
| 5E+06 | 3  | 2 | 2 | 2 | 6.281  | 4.88  | 7.216  | 5.033 | 2.233 | 2.926 | 0.907 | 2.368 | 3.517 | 0.962 | 0.886 | 0.755 | 1.198  | 1.139 | 0.9832 |
| 5E+06 | 3  | 1 | 1 | 1 | 8.57   | n/a   | 10.205 | 4.107 | 3.195 | 5.688 | 2.591 | n/a   | n/a   | n/a   | 1.496 | n/a   | 1.543  | n/a   | 0.4594 |
| 5E+06 | 3  | 1 | 1 | 2 | 10.113 | 6.986 | 9.584  | 3.862 | 3.085 | 4.377 | 1.877 | n/a   | n/a   | n/a   | 1.785 | n/a   | 1.659  | n/a   | 0.5713 |
| 5E+06 | 3  | 1 | 1 | 1 | 3.37   | n/a   | 11.386 | 3.159 | 2.957 | 4.814 | 2.443 | n/a   | n/a   | n/a   | 2.009 | n/a   | 1.8    | n/a   | 0.6225 |
| 5E+06 | 3  | 1 | 1 | 1 | 6.579  | n/a   | 10.324 | 3.243 | 3.371 | 4.592 | 1.931 | n/a   | n/a   | n/a   | 2.559 | n/a   | 2.374  | n/a   | 0.8212 |
| 5E+06 | 3  | 1 | 1 | 1 | 5.424  | n/a   | 5.56   | 3.657 | 3.243 | 3.08  | 1.793 | n/a   | n/a   | n/a   | 1.175 | n/a   | 1.637  | n/a   | 0.0064 |
| 5E+06 | 3  | 1 | 1 | 1 | 11.074 | n/a   | 6.822  | 3.097 | 2.61  | 3.66  | 1.293 | n/a   | n/a   | n/a   | 1.16  | n/a   | 1.254  | n/a   | 0.0894 |
| 5E+06 | 3  | 1 | 1 | 1 | 3.927  | n/a   | 7.232  | 3.337 | 2.948 | 4.022 | 1.727 | n/a   | n/a   | n/a   | 1.445 | n/a   | 1.16   | n/a   | 0.1236 |
| 5E+06 | 3  | 1 | 1 | 1 | 1.252  | n/a   | 9.451  | 2.842 | 2.837 | 3.66  | 1.283 | n/a   | n/a   | n/a   | 1.353 | n/a   | 1.313  | n/a   | 0.3103 |
| 5E+06 | 3  | 1 | 1 | 1 | 0.16   | n/a   | 11.383 | 3.561 | 3.443 | 5.181 | 1.793 | n/a   | n/a   | n/a   | 1.738 | n/a   | 1.698  | n/a   | 0.5525 |
| 5E+06 | 3  | 2 | 2 | 1 | 6.548  | n/a   | 9.251  | 3.432 | 3.013 | 5.164 | 2.505 | n/a   | n/a   | n/a   | 1.001 | 1.038 | 1.375  | 1.24  | 0.84   |
| 5E+06 | 3  | 1 | 1 | 1 | 12.264 | n/a   | 12.872 | 3.561 | 2.721 | 4.022 | 2.085 | n/a   | n/a   | n/a   | 1.16  | n/a   | 1.481  | n/a   | 0.4507 |
| 5E+06 | 3  | 1 | 1 | 1 | 11.451 | n/a   | 7.559  | 3.159 | 3.502 | 4.33  | 0.935 | n/a   | n/a   | n/a   | 1.289 | n/a   | 1.325  | n/a   | 0.1657 |

|       |   |   |   |   |        |       |        |       |       |       |       |       |       |       |       |       |       |       |        |
|-------|---|---|---|---|--------|-------|--------|-------|-------|-------|-------|-------|-------|-------|-------|-------|-------|-------|--------|
| 5E+06 | 3 | 1 | 1 | 1 | 9.493  | n/a   | 8.881  | 2.855 | 2.233 | 4.516 | 1.983 | n/a   | n/a   | n/a   | 1.058 | n/a   | 1.111 | n/a   | 0.2588 |
| 5E+06 | 3 | 1 | 1 | 1 | 10.627 | n/a   | 9.467  | 4.653 | 3.879 | 5.023 | 1.443 | n/a   | n/a   | n/a   | 0.965 | n/a   | 1.716 | n/a   | 0.3156 |
| 5E+06 | 4 | 1 | 1 | 1 | 12.85  | n/a   | 10.886 | 3.348 | 3.08  | 4.11  | 1.452 | n/a   | n/a   | n/a   | 1.159 | n/a   | 1.132 | n/a   | 0.3692 |
| 5E+06 | 4 | 1 | 2 | 2 | 10.229 | 3.17  | 6.328  | 5.012 | 2.768 | 3.825 | 1.938 | n/a   | 3.657 | 2.009 | 1.991 | n/a   | 1.038 | 0.868 | 0.979  |
| 5E+06 | 4 | 1 | 1 | 1 | 12.309 | n/a   | 10.73  | 3.702 | 2.869 | 5.601 | 3.047 | n/a   | n/a   | n/a   | 2.156 | n/a   | 1.963 | n/a   | 0.6654 |
| 5E+06 | 4 | 1 | 1 | 1 | 8.322  | n/a   | 10.423 | 2.405 | 2.74  | 5.338 | 2.495 | n/a   | n/a   | n/a   | 1.073 | n/a   | 1.274 | n/a   | 0.3529 |
| 5E+06 | 4 | 1 | 1 | 2 | 11.902 | 2.566 | 10.701 | 2.669 | 2.886 | 4.412 | 2.181 | n/a   | n/a   | n/a   | 2.062 | n/a   | 1.878 | n/a   | 0.6454 |
| 5E+06 | 4 | 1 | 1 | 1 | 8.502  | n/a   | 10.948 | 2.63  | 3.08  | 5.34  | 2.63  | n/a   | n/a   | n/a   | 1.768 | n/a   | 1.571 | n/a   | 0.534  |
| 5E+06 | 4 | 1 | 1 | 2 | 13.028 | 2.505 | 11.697 | 3.026 | 3.163 | 4.675 | 1.513 | n/a   | n/a   | n/a   | 2.299 | n/a   | 2.337 | n/a   | 0.7412 |
| 5E+06 | 4 | 1 | 1 | 1 | 4.527  | n/a   | 7.429  | 2.891 | 3.586 | 4.716 | 1.379 | n/a   | n/a   | n/a   | 1.009 | n/a   | 1.868 | n/a   | 0.1728 |
| 5E+06 | 4 | 1 | 1 | 1 | 4.574  | n/a   | 6.287  | 2.891 | 2.405 | 3.692 | 1.293 | n/a   | n/a   | n/a   | 1.017 | n/a   | 1.562 | n/a   | 0.0386 |
| 5E+06 | 4 | 2 | 2 | 2 | 6.577  | 2.832 | 6.612  | 6.272 | 3.013 | 3.688 | 1.361 | 3.151 | 4.088 | 1.87  | 1.326 | 0.8   | 1.005 | 1.195 | 0.9748 |
| 5E+06 | 4 | 1 | 1 | 1 | 5.713  | n/a   | 6.464  | 2.586 | 2.801 | 3.852 | 1.434 | n/a   | n/a   | n/a   | 1.548 | n/a   | 1.053 | n/a   | 0.0627 |
| 5E+06 | 4 | 1 | 1 | 1 | 20.026 | n/a   | 14.057 | 3.517 | 3.785 | 6.39  | 3.051 | n/a   | n/a   | n/a   | 2.017 | n/a   | 2.319 | n/a   | 0.7167 |
| 5E+06 | 5 | 1 | 1 | 1 | 8.273  | n/a   | 11.453 | 2.957 | 2.768 | 5.649 | 3.085 | n/a   | n/a   | n/a   | 2.554 | n/a   | 2.04  | n/a   | 0.7377 |
| 5E+06 | 5 | 1 | 1 | 1 | 15.588 | n/a   | 10.603 | 3.862 | 3.586 | 5.141 | 1.924 | n/a   | n/a   | n/a   | 2.339 | n/a   | 2.266 | n/a   | 0.7518 |
| 5E+06 | 5 | 1 | 1 | 1 | 4.991  | n/a   | 11.03  | 3.085 | 3.097 | 4.989 | 2.654 | n/a   | n/a   | n/a   | 1.455 | n/a   | 1.821 | n/a   | 0.5279 |
| 5E+06 | 5 | 1 | 1 | 1 | 13.333 | n/a   | 10.922 | 2.731 | 3.08  | 5.164 | 2.745 | n/a   | n/a   | n/a   | 2.433 | n/a   | 2.437 | n/a   | 0.7989 |
| 5E+06 | 5 | 1 | 1 | 1 | 7.059  | n/a   | 9.173  | 4.716 | 2.948 | 5.485 | 2.448 | n/a   | n/a   | n/a   | 1.709 | n/a   | 1.874 | n/a   | 0.5966 |
| 5E+06 | 5 | 1 | 1 | 1 | 10.263 | n/a   | 10.589 | 3.064 | 3.085 | 5.154 | 1.924 | n/a   | n/a   | n/a   | 1.772 | n/a   | 2.04  | n/a   | 0.616  |
| 5E+06 | 5 | 1 | 1 | 1 | 11.932 | n/a   | 12.173 | 3.051 | 3.207 | 5.951 | 3.013 | n/a   | n/a   | n/a   | 1.243 | n/a   | 1.599 | n/a   | 0.4711 |
| 5E+06 | 6 | 1 | 1 | 1 | 4.122  | n/a   | 7.631  | 2.091 | 2.745 | 4.197 | 1.521 | n/a   | n/a   | n/a   | 0.756 | n/a   | 1.284 | n/a   | 0.1375 |
| 5E+06 | 6 | 1 | 1 | 1 | 4.469  | n/a   | 7.063  | 3.085 | 2.891 | 4.362 | 1.764 | n/a   | n/a   | n/a   | 1.544 | n/a   | 1.289 | n/a   | 0.119  |
| 5E+06 | 6 | 1 | 1 | 1 | 6.64   | n/a   | 7.515  | 3.636 | 2.731 | 4.784 | 1.735 | n/a   | n/a   | n/a   | 1.049 | n/a   | 1.343 | n/a   | 0.1398 |
| 5E+06 | 6 | 1 | 1 | 2 | 8.25   | 2.296 | 7.618  | 4.784 | 2.869 | 3.983 | 1.434 | n/a   | n/a   | n/a   | 2.278 | n/a   | 2.742 | n/a   | 0.8745 |
| 5E+06 | 6 | 1 | 1 | 1 | 9.781  | n/a   | 9.184  | 3.085 | 2.571 | 4.318 | 1.828 | n/a   | n/a   | n/a   | 0.751 | n/a   | 1.282 | n/a   | 0.2792 |
| 5E+06 | 6 | 1 | 1 | 1 | 12.671 | n/a   | 10.888 | 2.721 | 2.801 | 5.793 | 3.026 | n/a   | n/a   | n/a   | 1.892 | n/a   | 1.748 | n/a   | 0.5934 |
| 5E+06 | 6 | 1 | 1 | 1 | 6.792  | n/a   | 8.754  | 3.085 | 2.891 | 5.236 | 3.08  | n/a   | n/a   | n/a   | 0.99  | n/a   | 1.004 | n/a   | 0.2288 |
| 5E+06 | 6 | 1 | 1 | 1 | 6.267  | n/a   | 9.239  | 3.183 | 2.61  | 4.447 | 2.411 | n/a   | n/a   | n/a   | 0.929 | n/a   | 1.172 | n/a   | 0.2895 |
| 5E+06 | 6 | 1 | 1 | 1 | 10.857 | n/a   | 8.941  | 3.604 | 2.688 | 4.234 | 1.983 | n/a   | n/a   | n/a   | 0.646 | n/a   | 1.241 | n/a   | 0.2512 |
| 5E+06 | 6 | 1 | 1 | 1 | 7.553  | n/a   | 11.426 | 2.566 | 3.502 | 5.511 | 2.586 | n/a   | n/a   | n/a   | 1.479 | n/a   | 1.553 | n/a   | 0.474  |
| 5E+06 | 6 | 2 | 2 | 2 | 10.693 | 4.291 | 7.123  | 4.94  | 2.054 | 3.72  | 1.379 | 2.886 | 3.383 | 1.674 | 1.146 | 0.832 | 1.378 | 1.375 | 0.9178 |
| 5E+06 | 6 | 1 | 1 | 1 | 12.571 | n/a   | 11.997 | 2.957 | 3.383 | 6.127 | 3.604 | n/a   | n/a   | n/a   | 0.883 | n/a   | 1.06  | n/a   | 0.3857 |
| 5E+06 | 6 | 1 | 1 | 1 | 14.015 | n/a   | 10.391 | 2.904 | 2.768 | 4.516 | 2.731 | n/a   | n/a   | n/a   | 0.793 | n/a   | 1.093 | n/a   | 0.3288 |
| 5E+06 | 6 | 1 | 1 | 1 | 11.416 | n/a   | 10.816 | 3.043 | 3.211 | 4.811 | 2.411 | n/a   | n/a   | n/a   | 0.841 | n/a   | 1.471 | n/a   | 0.3665 |
| 5E+06 | 6 | 2 | 2 | 2 | 8.641  | 5.801 | 6.305  | 4.172 | 2.745 | 3.462 | 0.661 | 3.159 | 4.169 | 1.379 | 1.135 | 0.691 | 0.772 | 1.002 | 0.9707 |
| 5E+06 | 6 | 1 | 1 | 1 | 5.622  | n/a   | 7.897  | 3.55  | 2.801 | 4.974 | 2.384 | n/a   | n/a   | n/a   | 0.969 | n/a   | 1.021 | n/a   | 0.1562 |
| 5E+06 | 6 | 1 | 1 | 1 | 4.695  | n/a   | 7.89   | 2.721 | 2.801 | 3.862 | 1.828 | n/a   | n/a   | n/a   | 0.968 | n/a   | 1.136 | n/a   | 0.1705 |
| 5E+06 | 6 | 1 | 1 | 1 | 9.509  | n/a   | 6.094  | 3.211 | 2.669 | 3.72  | 3.085 | n/a   | n/a   | n/a   | 0.754 | n/a   | 1.101 | n/a   | 0.0085 |
| 5E+06 | 7 | 1 | 1 | 1 | 11.902 | n/a   | 8.934  | 3.371 | 3.271 | 5.311 | 2.448 | n/a   | n/a   | n/a   | 1.404 | n/a   | 1.402 | n/a   | 0.2947 |
| 5E+06 | 7 | 1 | 1 | 1 | 6.925  | n/a   | 12.733 | 2.571 | 3.383 | 5.853 | 2.109 | n/a   | n/a   | n/a   | 2.447 | n/a   | 1.894 | n/a   | 0.7097 |
| 5E+06 | 7 | 1 | 1 | 1 | 9.011  | n/a   | 7.261  | 2.957 | 2.251 | 4.561 | 2.443 | n/a   | n/a   | n/a   | 1.07  | n/a   | 1.186 | n/a   | 0.1144 |
| 5E+06 | 7 | 1 | 1 | 1 | 8.913  | n/a   | 6.53   | 3.825 | 3.211 | 4.138 | 2.453 | n/a   | n/a   | n/a   | 1.134 | n/a   | 1.246 | n/a   | 0.0605 |
| 5E+06 | 7 | 1 | 1 | 1 | 10.604 | n/a   | 11.134 | 2.869 | 3.064 | 4.653 | 1.612 | n/a   | n/a   | n/a   | 1.541 | n/a   | 1.362 | n/a   | 0.4565 |
| 5E+06 | 7 | 1 | 1 | 1 | 3.586  | n/a   | 6.53   | 2.296 | 2.688 | 3.855 | 1.076 | n/a   | n/a   | n/a   | 1.13  | n/a   | 1.184 | n/a   | 0.0583 |
| 5E+06 | 7 | 1 | 1 | 1 | 1.479  | n/a   | 9.231  | 2.74  | 2.768 | 4.022 | 1.379 | n/a   | n/a   | n/a   | 1.023 | n/a   | 1.224 | n/a   | 0.2921 |
| 5E+06 | 7 | 1 | 1 | 1 | 19.1   | n/a   | 11.911 | 3.064 | 2.837 | 4.493 | 1.793 | n/a   | n/a   | n/a   | 1.299 | n/a   | 1.617 | n/a   | 0.4682 |
| 5E+06 | 7 | 1 | 1 | 1 | 13.673 | n/a   | 10.399 | 3.454 | 2.384 | 3.744 | 1.635 | n/a   | n/a   | n/a   | 1.466 | n/a   | 1.159 | n/a   | 0.3747 |
| 5E+06 | 7 | 1 | 1 | 1 | 16.821 | n/a   | 11.139 | 4.197 | 3.097 | 5.462 | 2.904 | n/a   | n/a   | n/a   | 1.03  | n/a   | 1.589 | n/a   | 0.4052 |
| 5E+06 | 7 | 1 | 1 | 1 | 7.585  | n/a   | 10.097 | 3.521 | 2.944 | 4.994 | 3.247 | n/a   | n/a   | n/a   | 1.686 | n/a   | 1.57  | n/a   | 0.5158 |
| 5E+06 | 7 | 1 | 1 | 1 | 0.975  | n/a   | 9.829  | 3.051 | 2.51  | 4.403 | 2.109 | n/a   | n/a   | n/a   | 1.31  | n/a   | 1.402 | n/a   | 0.3395 |
| 5E+06 | 7 | 1 | 1 | 1 | 3.459  | n/a   | 7.711  | 2.801 | 2.731 | 4.06  | 1.322 | n/a   | n/a   | n/a   | 0.837 | n/a   | 1.141 | n/a   | 0.1468 |
| 5E+06 | 7 | 1 | 1 | 1 | 13.608 | n/a   | 7.701  | 3.383 | 2.091 | 3.371 | 1.793 | n/a   | n/a   | n/a   | 1.074 | n/a   | 1.283 | n/a   | 0.1633 |
| 5E+06 | 7 | 1 | 1 | 1 | 11.5   | n/a   | 12.772 | 3.013 | 3.183 | 5.594 | 2.801 | n/a   | n/a   | n/a   | 1.933 | n/a   | 2.295 | n/a   | 0.6994 |
| 5E+06 | 7 | 1 | 1 | 0 | n/a    | n/a   | 5.992  | 4.473 | 1.651 | 3.064 | 2.028 | n/a   | n/a   | n/a   | 1.113 | n/a   | 1.519 | n/a   | 0.017  |
| 5E+06 | 7 | 1 | 1 | 1 | 11.395 | n/a   | 6.227  | 3.561 | 2.505 | 3.744 | 1.027 | n/a   | n/a   | n/a   | 1.42  | n/a   | 1.017 | n/a   | 0.0299 |
| 5E+06 | 7 | 1 | 2 | 2 | 10.01  | 3.159 | 8.856  | 4.356 | 2.996 | 3.931 | 1.513 | n/a   | 4.362 | 1.705 | 1.886 | n/a   | 1.264 | 1.44  | 0.8514 |
| 5E+06 | 7 | 1 | 1 | 1 | 11.702 | n/a   | 10.682 | 2.571 | 3.043 | 5.757 | 2.571 | n/a   | n/a   | n/a   | 2.1   | n/a   | 1.707 | n/a   | 0.6127 |
| 5E+06 | 8 | 1 | 1 | 1 | 5.719  | n/a   | 9.981  | 2.944 | 2.891 | 4.95  | 2.228 | n/a   | n/a   | n/a   | 1.344 | n/a   | 1.29  | n/a   | 0.3502 |
| 5E+06 | 8 | 1 | 1 | 0 | n/a    | n/a   | 8.481  | 2.384 | 2.489 | 3.561 | 0.962 | n/a   | n/a   | n/a   | 1.135 | n/a   | 1.277 | n/a   | 0.226  |
| 5E+06 | 8 | 1 | 1 | 1 | 5.48   | n/a   | 6.545  | 3.013 | 2.855 | 2.837 | 0.935 | n/a   | n/a   | n/a   | 0.57  | n/a   | 1.207 | n/a   | 0.0342 |
| 5E+06 | 8 | 1 | 1 | 1 | 14.251 | n/a   | 10.143 | 2.957 | 2.891 | 4.888 | 2.368 | n/a   | n/a   | n/a   | 1.265 | n/a   | 1.518 | n/a   | 0.3802 |
| 5E+06 | 8 | 1 | 1 | 1 | 10.098 | n/a   | 11.671 | 3.657 | 3.085 | 5.033 | 2.335 | n/a   | n/a   | n/a   | 2.209 | n/a   | 2.06  | n/a   | 0.696  |
| 5E+06 | 8 | 1 | 1 | 1 | 11.559 | n/a   | 10.976 | 3.55  | 2.891 | 3.905 | 1.635 | n/a   | n/a   | n/a   | 1.648 | n/a   | 1.49  | n/a   | 0.4918 |
| 5E+06 | 8 | 1 | 1 | 1 | 10.613 | n/a   | 6.581  | 3.409 | 2.61  | 3.517 | 0.907 | n/a   | n/a   | n/a   | 1.014 | n/a   | 1.101 | n/a   | 0.0561 |

|       |    |   |   |   |        |       |        |       |       |       |       |       |       |       |       |       |       |       |        |
|-------|----|---|---|---|--------|-------|--------|-------|-------|-------|-------|-------|-------|-------|-------|-------|-------|-------|--------|
| 5E+06 | 8  | 1 | 1 | 1 | 12.962 | n/a   | 10.021 | 3.247 | 2.957 | 5.448 | 2.313 | n/a   | n/a   | n/a   | 2.705 | n/a   | 2.353 | n/a   | 0.8287 |
| 5E+06 | 8  | 1 | 1 | 2 | 7.7    | 1.37  | 10.734 | 3.528 | 3.207 | 5.134 | 2.181 | n/a   | n/a   | n/a   | 2.853 | n/a   | 2.222 | n/a   | 0.8063 |
| 5E+06 | 8  | 1 | 1 | 1 | 1.958  | n/a   | 6.589  | 2.535 | 2.688 | 4.012 | 1.651 | n/a   | n/a   | n/a   | 1.475 | n/a   | 1.005 | n/a   | 0.0716 |
| 5E+06 | 8  | 1 | 1 | 1 | 7.949  | n/a   | 11.046 | 3.247 | 2.669 | 4.738 | 2.296 | n/a   | n/a   | n/a   | 1.925 | n/a   | 1.972 | n/a   | 0.6388 |
| 5E+06 | 8  | 1 | 1 | 1 | 9.296  | n/a   | 9.967  | 2.745 | 2.721 | 4.237 | 2.566 | n/a   | n/a   | n/a   | 1.157 | n/a   | 1.161 | n/a   | 0.3262 |
| 5E+06 | 8  | 1 | 1 | 1 | 12.831 | n/a   | 12.655 | 3.561 | 2.926 | 5.376 | 2.74  | n/a   | n/a   | n/a   | 1.783 | n/a   | 1.995 | n/a   | 0.6257 |
| 5E+06 | 8  | 1 | 2 | 2 | 7.647  | 3.143 | 7.207  | 4.953 | 3.026 | 4.06  | 1.958 | n/a   | 4.009 | 1.293 | 2.203 | n/a   | 1.169 | 1.642 | 0.8901 |
| 5E+06 | 8  | 1 | 1 | 1 | 13.02  | n/a   | 9.173  | 3.064 | 2.926 | 4.197 | 2.571 | n/a   | n/a   | n/a   | 1.05  | n/a   | 1.444 | n/a   | 0.2973 |
| 5E+06 | 8  | 1 | 1 | 1 | 9.123  | n/a   | 7.937  | 4.197 | 3.561 | 6.254 | 2.586 | n/a   | n/a   | n/a   | 1.447 | n/a   | 1.498 | n/a   | 0.2091 |
| 5E+06 | 8  | 1 | 1 | 1 | 6.421  | n/a   | 8.464  | 3.051 | 2.453 | 4.784 | 2.654 | n/a   | n/a   | n/a   | 0.562 | n/a   | 1.382 | n/a   | 0.1969 |
| 5E+06 | 8  | 1 | 1 | 1 | 12.477 | n/a   | 11.259 | 2.957 | 2.904 | 5.567 | 3.227 | n/a   | n/a   | n/a   | 2.037 | n/a   | 1.978 | n/a   | 0.6587 |
| 5E+06 | 8  | 1 | 1 | 1 | 5.509  | n/a   | 7.908  | 2.411 | 2.957 | 4.869 | 2.745 | n/a   | n/a   | n/a   | 1.455 | n/a   | 1.308 | n/a   | 0.192  |
| 5E+06 | 9  | 1 | 2 | 2 | 7.312  | 2.842 | 8.058  | 4.169 | 3.368 | 2.944 | 4.473 | n/a   | n/a   | 4.009 | 2.133 | n/a   | 0.83  | 1.267 | 0.9665 |
| 5E+06 | 9  | 1 | 1 | 1 | 6.2    | n/a   | 10.691 | 3.183 | 3.207 | 5.71  | 2.448 | n/a   | n/a   | n/a   | 2.289 | n/a   | 2.035 | n/a   | 0.6891 |
| 5E+06 | 9  | 1 | 1 | 1 | 4.819  | n/a   | 5.253  | 2.228 | 2.837 | 4.019 | 1.764 | n/a   | n/a   | n/a   | 1.877 | n/a   | 1.176 | n/a   | 0.0021 |
| 5E+06 | 9  | 2 | 2 | 2 | 7.828  | 3.542 | 6.653  | 5.194 | 2.805 | 3.882 | 1.37  | 2.731 | 3.271 | 1.252 | 1.107 | 1.81  | 1.146 | 1.21  | 0.8862 |
| 5E+06 | 9  | 1 | 1 | 1 | 9.783  | n/a   | 8.696  | 3.702 | 3.306 | 4.919 | 1.452 | n/a   | n/a   | n/a   | 1.709 | n/a   | 1.136 | n/a   | 0.2741 |
| 5E+06 | 9  | 1 | 2 | 2 | 7.353  | 2.427 | 7.462  | 5.063 | 2.586 | 3.73  | 1.604 | n/a   | 4.057 | 2.009 | 2.127 | n/a   | 1.616 | 1.316 | 0.8784 |
| 5E+06 | 9  | 1 | 1 | 1 | 6.566  | n/a   | 7.674  | 3.08  | 2.251 | 4.953 | 2.948 | n/a   | n/a   | n/a   | 1.356 | n/a   | 1.358 | n/a   | 0.1776 |
| 5E+06 | 9  | 1 | 1 | 1 | 9.172  | n/a   | 10.897 | 2.944 | 2.535 | 4.76  | 2.61  | n/a   | n/a   | n/a   | 1.52  | n/a   | 1.33  | n/a   | 0.4278 |
| 5E+06 | 9  | 1 | 1 | 2 | 12.616 | 0.818 | 11.396 | 2.731 | 3.085 | 5.455 | 2.181 | n/a   | n/a   | n/a   | 2.061 | n/a   | 1.567 | n/a   | 0.5903 |
| 5E+06 | 9  | 1 | 1 | 1 | 6.819  | n/a   | 11.097 | 3.862 | 3.302 | 5.253 | 2.505 | n/a   | n/a   | n/a   | 1.694 | n/a   | 1.805 | n/a   | 0.5681 |
| 5E+06 | 9  | 1 | 1 | 1 | 1.793  | n/a   | 9.498  | 3.462 | 3.064 | 4.822 | 2.74  | n/a   | n/a   | n/a   | 2.578 | n/a   | 2.61  | n/a   | 0.8324 |
| 5E+06 | 9  | 1 | 1 | 1 | 6.013  | n/a   | 7.531  | 3.163 | 2.61  | 4.261 | 1.771 | n/a   | n/a   | n/a   | 1.052 | n/a   | 1.172 | n/a   | 0.1352 |
| 5E+06 | 9  | 1 | 1 | 1 | 6.088  | n/a   | 8.565  | 2.948 | 3.013 | 4.234 | 1.735 | n/a   | n/a   | n/a   | 1.334 | n/a   | 1.154 | n/a   | 0.2437 |
| 5E+06 | 9  | 2 | 2 | 2 | 13.572 | 5.412 | 6.543  | 6.062 | 2.443 | 3.409 | 1.134 | 2.443 | 3.306 | 0.962 | 1.298 | 1.174 | 0.807 | 0.914 | 0.9624 |
| 5E+06 | 9  | 1 | 1 | 1 | 8.871  | n/a   | 10.562 | 2.51  | 2.505 | 4.877 | 2.535 | n/a   | n/a   | n/a   | 1.331 | n/a   | 1.318 | n/a   | 0.3913 |
| 5E+06 | 9  | 1 | 1 | 2 | 6.05   | 2.726 | 10.781 | 3.247 | 3.08  | 5.36  | 2.157 | n/a   | n/a   | n/a   | 3.023 | n/a   | 2.516 | n/a   | 0.8249 |
| 5E+06 | 9  | 1 | 1 | 1 | 8.809  | n/a   | 8.738  | 4.197 | 2.181 | 4.047 | 2.571 | n/a   | n/a   | n/a   | 1.23  | n/a   | 1.195 | n/a   | 0.2563 |
| 5E+06 | 9  | 1 | 1 | 1 | 11.932 | n/a   | 10.556 | 2.801 | 2.535 | 5.164 | 2.842 | n/a   | n/a   | n/a   | 1.704 | n/a   | 1.562 | n/a   | 0.5218 |
| 5E+06 | 9  | 1 | 1 | 2 | 7.904  | 1.958 | 10.787 | 2.891 | 3.227 | 5.063 | 2.268 | n/a   | n/a   | n/a   | 1.972 | n/a   | 2.036 | n/a   | 0.6554 |
| 5E+06 | 9  | 1 | 1 | 1 | 8.916  | n/a   | 6.962  | 4.057 | 2.535 | 3.852 | 2.091 | n/a   | n/a   | n/a   | 1.003 | n/a   | 1.32  | n/a   | 0.094  |
| 5E+06 | 9  | 1 | 1 | 1 | 6.472  | n/a   | 6.14   | 2.731 | 2.505 | 3.812 | 1.452 | n/a   | n/a   | n/a   | 0.985 | n/a   | 1.022 | n/a   | 0.0106 |
| 5E+06 | 9  | 1 | 1 | 1 | 6.626  | n/a   | 7.564  | 3.368 | 3.013 | 4.538 | 1.587 | n/a   | n/a   | n/a   | 0.679 | n/a   | 1.448 | n/a   | 0.1329 |
| 5E+06 | 9  | 1 | 1 | 1 | 6.922  | n/a   | 11.073 | 3.223 | 3.051 | 5.221 | 2.028 | n/a   | n/a   | n/a   | 1.619 | n/a   | 1.748 | n/a   | 0.5402 |
| 5E+06 | 9  | 1 | 1 | 1 | 15.423 | n/a   | 14.405 | 4.182 | 2.855 | 5.462 | 2.443 | n/a   | n/a   | n/a   | 1.809 | n/a   | 1.863 | n/a   | 0.5776 |
| 5E+06 | 10 | 1 | 1 | 1 | 5.581  | n/a   | 7.506  | 2.74  | 2.296 | 3.879 | 1.293 | n/a   | n/a   | n/a   | 1.569 | n/a   | 1.103 | n/a   | 0.161  |
| 5E+06 | 10 | 1 | 1 | 1 | 9.014  | n/a   | 10.514 | 3.114 | 2.886 | 4.869 | 2.63  | n/a   | n/a   | n/a   | 1.394 | n/a   | 1.588 | n/a   | 0.4478 |
| 5E+06 | 10 | 1 | 1 | 1 | 4.333  | n/a   | 7.063  | 3.383 | 2.944 | 4.853 | 2.384 | n/a   | n/a   | n/a   | 1.049 | n/a   | 1.252 | n/a   | 0.0985 |
| 5E+06 | 10 | 1 | 1 | 1 | 9.059  | n/a   | 6.645  | 2.801 | 2.891 | 3.692 | 1.604 | n/a   | n/a   | n/a   | 1.28  | n/a   | 1.145 | n/a   | 0.076  |
| 5E+06 | 10 | 1 | 1 | 1 | 4.677  | n/a   | 9.131  | 2.731 | 3.428 | 3.754 | 1.027 | n/a   | n/a   | n/a   | 1.136 | n/a   | 1.056 | n/a   | 0.2818 |
| 5E+06 | 10 | 2 | 2 | 2 | 11.741 | 1.828 | 7.82   | 4.768 | 3.043 | 4.197 | 1.221 | 3.383 | 5.141 | 1.521 | 1.114 | 1.666 | 1.259 | 1.187 | 0.8629 |
| 5E+06 | 10 | 1 | 1 | 1 | 5.948  | n/a   | 7.803  | 2.489 | 2.296 | 4.246 | 1.252 | n/a   | n/a   | n/a   | 1.071 | n/a   | 1.087 | n/a   | 0.1539 |
| 5E+06 | 10 | 2 | 2 | 1 | 3.517  | n/a   | 7.864  | 3.207 | 3.085 | 4.362 | 1.379 | n/a   | n/a   | n/a   | 1.075 | 1.055 | 1.221 | 1.275 | 0.8979 |
| 5E+06 | 10 | 1 | 1 | 1 | 4.639  | n/a   | 6.645  | 3.306 | 2.842 | 4.261 | 1.651 | n/a   | n/a   | n/a   | 1.632 | n/a   | 0.967 | n/a   | 0.0827 |
| 5E+06 | 10 | 1 | 1 | 1 | 10.684 | n/a   | 9.526  | 3.163 | 3.085 | 4.303 | 1.521 | n/a   | n/a   | n/a   | 0.942 | n/a   | 1.089 | n/a   | 0.3025 |
| 5E+06 | 10 | 1 | 1 | 1 | 8.305  | n/a   | 11.568 | 3.306 | 3.409 | 5.462 | 2.443 | n/a   | n/a   | n/a   | 2.601 | n/a   | 2.189 | n/a   | 0.7662 |
| 5E+06 | 10 | 1 | 1 | 1 | 12.183 | n/a   | 11.525 | 3.692 | 3.306 | 5.669 | 2.645 | n/a   | n/a   | n/a   | 2.124 | n/a   | 1.951 | n/a   | 0.6688 |
| 5E+06 | 10 | 1 | 1 | 1 | 4.907  | n/a   | 6.498  | 2.842 | 3.085 | 4.493 | 1.443 | n/a   | n/a   | n/a   | 1.159 | n/a   | 1.068 | n/a   | 0.0517 |
| 5E+06 | 10 | 1 | 1 | 1 | 9.409  | n/a   | 7.357  | 3.398 | 2.61  | 3.664 | 1.604 | n/a   | n/a   | n/a   | 0.888 | n/a   | 1.231 | n/a   | 0.1167 |
| 5E+06 | 10 | 1 | 1 | 1 | 18.97  | n/a   | 14.279 | 3.443 | 3.628 | 5.968 | 3.085 | 3.175 | 6.028 | 3.243 | 2.037 | n/a   | 2.113 | n/a   | 0.6925 |
| 5E+06 | 11 | 1 | 1 | 1 | 6.621  | n/a   | 10.729 | 2.63  | 2.586 | 4.877 | 2.384 | n/a   | n/a   | n/a   | 1.39  | n/a   | 1.377 | n/a   | 0.4108 |
| 5E+06 | 11 | 1 | 1 | 1 | 6.49   | n/a   | 8.499  | 2.944 | 2.091 | 4.088 | 1.931 | n/a   | n/a   | n/a   | 1.189 | n/a   | 1.107 | n/a   | 0.2213 |
| 5E+06 | 11 | 1 | 1 | 2 | 15.942 | 3.207 | 14.588 | 3.247 | 2.957 | 5.667 | 3.207 | n/a   | n/a   | n/a   | 3.568 | n/a   | 2.122 | n/a   | 0.7698 |
| 5E+06 | 11 | 2 | 2 | 2 | 7.089  | 3.857 | 6.837  | 5.443 | 2.296 | 3.195 | 1.014 | 2.842 | 3.454 | 1.027 | 1.269 | 0.809 | 1.121 | 1.472 | 0.9218 |
| 5E+06 | 11 | 1 | 1 | 1 | 8.443  | n/a   | 8.076  | 2.926 | 2.335 | 3.702 | 1.793 | n/a   | n/a   | n/a   | 1.442 | n/a   | 1.184 | n/a   | 0.2017 |
| 5E+06 | 11 | 2 | 2 | 2 | 10.984 | 5.209 | 6.623  | 5.936 | 2.586 | 3.271 | 1.076 | 2.745 | 3.73  | 1.134 | 1.293 | 0.679 | 1.155 | 1.395 | 0.9379 |
| 5E+06 | 11 | 1 | 1 | 1 | 10.711 | n/a   | 10.945 | 3.183 | 2.669 | 4.527 | 2.109 | n/a   | n/a   | n/a   | 1.565 | n/a   | 1.207 | n/a   | 0.4136 |
| 5E+06 | 11 | 1 | 1 | 1 | 10.708 | n/a   | 8.665  | 3.183 | 2.505 | 4.493 | 2.009 | n/a   | n/a   | n/a   | 1.238 | n/a   | 1.403 | n/a   | 0.2613 |
| 5E+06 | 11 | 1 | 1 | 1 | 11.025 | n/a   | 11.435 | 2.591 | 2.645 | 4.805 | 2.041 | n/a   | n/a   | n/a   | 1.441 | n/a   | 1.364 | n/a   | 0.4335 |
| 5E+06 | 11 | 1 | 1 | 1 | 10.249 | n/a   | 12.694 | 2.948 | 3.163 | 6.254 | 2.842 | n/a   | n/a   | n/a   | 1.709 | n/a   | 1.676 | n/a   | 0.5371 |
| 5E+06 | 11 | 1 | 1 | 1 | 6.211  | n/a   | 7.343  | 3.702 | 2.586 | 4.082 | 1.579 | n/a   | n/a   | n/a   | 1.114 | n/a   | 1.157 | n/a   | 0.1213 |
| 5E+06 | 11 | 1 | 1 | 1 | 5.239  | n/a   | 9.707  | 3.013 | 2.837 | 4.082 | 1.651 | n/a   | n/a   | n/a   | 1.103 | n/a   | 1.487 | n/a   | 0.3235 |
| 5E+06 | 12 | 2 | 2 | 2 | 6.588  | 3.384 | 6.918  | 5.104 | 2.855 | 3.402 | 0.864 | 2.957 | 3.517 | 0.864 | 0.733 | 1.496 | 1.175 | 1.077 | 0.9338 |
| 5E+06 | 12 | 1 | 1 | 1 | 5.296  | n/a   | 6.227  | 2.405 | 2.51  | 4.182 | 1.828 | n/a   | n/a   | n/a   | 1.073 | n/a   | 1.123 | n/a   | 0.0192 |

|       |    |   |   |   |        |       |        |       |       |       |       |       |       |       |       |       |       |       |        |
|-------|----|---|---|---|--------|-------|--------|-------|-------|-------|-------|-------|-------|-------|-------|-------|-------|-------|--------|
| 5E+06 | 12 | 1 | 1 | 1 | 9.429  | n/a   | 6.464  | 4.261 | 2.535 | 2.405 | 1.434 | n/a   | n/a   | n/a   | 1.363 | n/a   | 1.074 | n/a   | 0.0539 |
| 5E+06 | 12 | 1 | 1 | 1 | 15.899 | n/a   | 14.66  | 3.74  | 2.855 | 5.289 | 3.383 | n/a   | n/a   | n/a   | 1.936 | n/a   | 1.802 | n/a   | 0.629  |
| 5E+06 | 12 | 1 | 1 | 1 | 5.417  | n/a   | 7.557  | 3.348 | 2.688 | 4.356 | 1.983 | n/a   | n/a   | n/a   | 1.056 | n/a   | 1.278 | n/a   | 0.1445 |
| 5E+06 | 12 | 1 | 1 | 1 | 5.781  | n/a   | 6.287  | 3.175 | 2.157 | 2.891 | 1.604 | n/a   | n/a   | n/a   | 1.264 | n/a   | 1.241 | n/a   | 0.0321 |
| 5E+06 | 12 | 1 | 1 | 1 | 11.277 | n/a   | 11.122 | 3.29  | 3.085 | 5.104 | 2.591 | n/a   | n/a   | n/a   | 2.1   | n/a   | 1.709 | n/a   | 0.6192 |
| 5E+06 | 12 | 1 | 1 | 2 | 7.939  | 0.818 | 10.801 | 3.243 | 3.026 | 5.631 | 2.745 | n/a   | n/a   | n/a   | 1.769 | n/a   | 1.335 | n/a   | 0.4829 |
| 5E+06 | 12 | 1 | 1 | 1 | 9.918  | n/a   | 7.671  | 2.51  | 2.296 | 3.195 | 1.134 | n/a   | n/a   | n/a   | 1.565 | n/a   | 0.996 | n/a   | 0.1752 |
| 5E+06 | 12 | 1 | 1 | 1 | 9.04   | n/a   | 8.652  | 2.251 | 2.842 | 5.033 | 2.891 | n/a   | n/a   | n/a   | 1.172 | n/a   | 1.267 | n/a   | 0.2538 |
| 5E+06 | 12 | 1 | 1 | 2 | 8.669  | 1.156 | 11.17  | 3.183 | 2.61  | 4.762 | 1.479 | n/a   | n/a   | n/a   | 2.298 | n/a   | 2.65  | n/a   | 0.7952 |
| 5E+06 | 12 | 1 | 1 | 1 | 1.027  | n/a   | 9.471  | 3.66  | 2.891 | 4.209 | 1.877 | n/a   | n/a   | n/a   | 1.405 | n/a   | 1.778 | n/a   | 0.5007 |
| 5E+06 | 12 | 1 | 1 | 1 | 11.607 | n/a   | 9.985  | 3.013 | 2.891 | 4.768 | 2.181 | n/a   | n/a   | n/a   | 2.46  | n/a   | 1.859 | n/a   | 0.6789 |
| 5E+06 | 12 | 1 | 1 | 1 | 7.285  | n/a   | 8.982  | 3.051 | 2.571 | 5.379 | 2.268 | n/a   | n/a   | n/a   | 1.154 | n/a   | 1.086 | n/a   | 0.2715 |
| 5E+06 | 12 | 1 | 1 | 1 | 12.901 | n/a   | 12.571 | 3.302 | 3.085 | 4.661 | 1.951 | n/a   | n/a   | n/a   | 2.601 | n/a   | 2.718 | n/a   | 0.7843 |
| 5E+06 | 12 | 1 | 1 | 1 | 9.088  | n/a   | 9.725  | 2.957 | 3.383 | 5.793 | 2.427 | n/a   | n/a   | n/a   | 2.052 | n/a   | 1.383 | n/a   | 0.565  |
| 5E+06 | 12 | 2 | 2 | 2 | 7.148  | 3.114 | 6.488  | 5.518 | 2.091 | 3.428 | 1.521 | 2.384 | 3.195 | 1.014 | 1.062 | 0.547 | 1.439 | 1.377 | 0.9583 |
| 5E+06 | 12 | 1 | 1 | 1 | 8.602  | n/a   | 9.287  | 2.586 | 2.731 | 4.209 | 1.513 | n/a   | n/a   | n/a   | 1.471 | n/a   | 1.093 | n/a   | 0.3051 |
| 5E+06 | 12 | 1 | 1 | 1 | 3.749  | n/a   | 8.469  | 2.801 | 2.384 | 3.74  | 1.434 | n/a   | n/a   | n/a   | 1.146 | n/a   | 1.442 | n/a   | 0.2412 |
| 5E+06 | 12 | 1 | 1 | 1 | 9.221  | n/a   | 8.621  | 2.495 | 2.855 | 3.882 | 1.479 | n/a   | n/a   | n/a   | 1.139 | n/a   | 1.135 | n/a   | 0.2337 |
| 5E+06 | 12 | 1 | 1 | 1 | 6.031  | n/a   | 10.204 | 3.026 | 3.064 | 5.194 | 1.938 | n/a   | n/a   | n/a   | 2.058 | n/a   | 1.431 | n/a   | 0.5744 |
| 5E+06 | 12 | 1 | 2 | 2 | 9.126  | 4.826 | 6.301  | 4.784 | 2.443 | 3.085 | 0.907 | n/a   | 2.904 | 1.604 | 1.21  | n/a   | 1.339 | 0.898 | 0.9542 |
| 5E+06 | 12 | 1 | 1 | 1 | 12.317 | n/a   | 8.577  | 2.948 | 3.026 | 4.303 | 1.87  | n/a   | n/a   | n/a   | 1.297 | n/a   | 1.208 | n/a   | 0.2487 |
| 5E+06 | 12 | 1 | 1 | 1 | 12.089 | n/a   | 10.552 | 2.489 | 2.61  | 4.661 | 2.091 | n/a   | n/a   | n/a   | 2.102 | n/a   | 1.664 | n/a   | 0.6063 |
| 5E+06 | 12 | 1 | 1 | 1 | 8.409  | n/a   | 10.367 | 2.768 | 2.571 | 4.318 | 1.938 | n/a   | n/a   | n/a   | 1.765 | n/a   | 1.406 | n/a   | 0.4977 |
| 5E+06 | 12 | 1 | 1 | 1 | 6.714  | n/a   | 8.856  | 2.957 | 2.448 | 5.164 | 2.489 | n/a   | n/a   | n/a   | 1.207 | n/a   | 1.209 | n/a   | 0.2664 |
| 5E+06 | 12 | 1 | 1 | 1 | 7.598  | n/a   | 11.083 | 3.051 | 3.383 | 5.134 | 2.268 | n/a   | n/a   | n/a   | 1.636 | n/a   | 1.602 | n/a   | 0.5097 |
| 5E+06 | 12 | 1 | 1 | 1 | 9.143  | n/a   | 11.954 | 3.383 | 3.306 | 6.096 | 3.097 | n/a   | n/a   | n/a   | 1.408 | n/a   | 1.485 | n/a   | 0.4653 |
| 5E+06 | 12 | 1 | 1 | 1 | 11.743 | n/a   | 11.125 | 3.72  | 3.223 | 5.615 | 2.768 | n/a   | n/a   | n/a   | 2.976 | n/a   | 2.678 | n/a   | 0.8174 |
| 5E+06 | 12 | 1 | 1 | 0 | n/a    | n/a   | 12.121 | 3.159 | 3.664 | 5.094 | 1.705 | n/a   | n/a   | n/a   | 1.72  | n/a   | 1.585 | n/a   | 0.531  |
| 5E+06 | 12 | 1 | 1 | 1 | 10.427 | n/a   | 8.537  | 3.211 | 2.571 | 4.022 | 1.764 | n/a   | n/a   | n/a   | 0.889 | n/a   | 1.258 | n/a   | 0.214  |
| 5E+06 | 12 | 1 | 1 | 1 | 6.464  | n/a   | 12.873 | 3.383 | 4.318 | 6.237 | 2.14  | n/a   | n/a   | n/a   | 2.321 | n/a   | 2.094 | n/a   | 0.7271 |
| 5E+06 | 13 | 1 | 1 | 1 | 9.165  | n/a   | 7.564  | 2.726 | 2.891 | 4.516 | 1.727 | n/a   | n/a   | n/a   | 1.486 | n/a   | 0.93  | n/a   | 0.1515 |
| 5E+06 | 13 | 1 | 1 | 0 | n/a    | n/a   | 8.833  | 2.842 | 2.768 | 5.221 | 2.268 | n/a   | n/a   | n/a   | 1.031 | n/a   | 1.368 | n/a   | 0.2639 |
| 5E+06 | 13 | 1 | 1 | 1 | 6.626  | n/a   | 10.447 | 3.151 | 3.159 | 5.578 | 2.181 | n/a   | n/a   | n/a   | 2.089 | n/a   | 1.822 | n/a   | 0.6356 |
| 5E+06 | 13 | 1 | 1 | 1 | 9.686  | n/a   | 10.002 | 3.432 | 3.026 | 5.567 | 2.842 | n/a   | n/a   | n/a   | 1.666 | n/a   | 1.666 | n/a   | 0.5433 |
| 5E+06 | 13 | 1 | 1 | 1 | 4.953  | n/a   | 6.422  | 3.368 | 2.645 | 3.618 | 0.641 | n/a   | n/a   | n/a   | 1.402 | n/a   | 0.985 | n/a   | 0.0495 |
| 5E+06 | 13 | 1 | 1 | 1 | 6.61   | n/a   | 9.741  | 2.801 | 2.983 | 4.738 | 2.028 | n/a   | n/a   | n/a   | 1.433 | n/a   | 1.433 | n/a   | 0.372  |
| 5E+06 | 13 | 1 | 1 | 1 | 5.76   | n/a   | 10.801 | 3.306 | 2.842 | 5.388 | 3.383 | n/a   | n/a   | n/a   | 1.363 | n/a   | 1.909 | n/a   | 0.5249 |
| 5E+06 | 13 | 1 | 1 | 1 | 11.161 | n/a   | 10.976 | 3.657 | 3.271 | 4.716 | 1.828 | n/a   | n/a   | n/a   | 3.39  | n/a   | 2.035 | n/a   | 0.8137 |
| 5E+06 | 13 | 1 | 1 | 1 | 6.068  | n/a   | 11.619 | 2.891 | 2.688 | 4.561 | 2.448 | n/a   | n/a   | n/a   | 2.172 | n/a   | 1.85  | n/a   | 0.6621 |
| 5E+06 | 13 | 1 | 1 | 1 | 6.805  | n/a   | 10.787 | 3.29  | 2.801 | 4.586 | 2.443 | n/a   | n/a   | n/a   | 1.223 | n/a   | 1.5   | n/a   | 0.3968 |
| 5E+06 | 14 | 2 | 2 | 2 | 10.922 | 5.582 | 6.171  | 4.805 | 2.085 | 3.402 | 1.322 | 2.586 | 4.098 | 1.252 | 1.726 | 1.08  | 0.812 | 1.002 | 0.9298 |
| 5E+06 | 14 | 1 | 1 | 2 | 9.19   | 1.612 | 11.435 | 3.348 | 2.926 | 5.539 | 2.948 | n/a   | n/a   | n/a   | 2.332 | n/a   | 2.155 | n/a   | 0.7306 |
| 5E+06 | 14 | 1 | 1 | 1 | 10.984 | n/a   | 10.268 | 3.657 | 2.268 | 4.209 | 2.157 | n/a   | n/a   | n/a   | 2.706 | n/a   | 1.889 | n/a   | 0.7554 |
| 5E+06 | 14 | 1 | 1 | 1 | 6.372  | n/a   | 5.757  | 3.243 | 2.731 | 3.961 | 1.814 | n/a   | n/a   | n/a   | 1.188 | n/a   | 1.1   | n/a   | 0.0042 |
| 5E+06 | 14 | 1 | 1 | 2 | 5.873  | 1.828 | 10.233 | 4.019 | 2.801 | 4.38  | 1.793 | n/a   | n/a   | n/a   | 2.602 | n/a   | 2.147 | n/a   | 0.8026 |
| 5E+06 | 14 | 1 | 1 | 1 | 13.174 | n/a   | 13.394 | 2.085 | 3.175 | 5.61  | 3.618 | n/a   | n/a   | n/a   | 1.006 | n/a   | 1.305 | n/a   | 0.4024 |
| 5E+06 | 14 | 1 | 1 | 1 | 9.234  | n/a   | 10.943 | 3.064 | 3.462 | 5.194 | 2.245 | n/a   | n/a   | n/a   | 1.836 | n/a   | 1.554 | n/a   | 0.5494 |
| 5E+06 | 14 | 1 | 1 | 1 | 6.103  | n/a   | 10.108 | 3.862 | 2.768 | 5.124 | 2.837 | n/a   | n/a   | n/a   | 1.946 | n/a   | 1.868 | n/a   | 0.6095 |
| 5E+06 | 14 | 1 | 1 | 1 | 5.403  | n/a   | 6.612  | 3.409 | 2.944 | 4.209 | 1.134 | n/a   | n/a   | n/a   | 1.29  | n/a   | 1.182 | n/a   | 0.0738 |
| 5E+06 | 14 | 1 | 1 | 1 | 11.463 | n/a   | 9.483  | 3.211 | 2.996 | 4.653 | 1.635 | n/a   | n/a   | n/a   | 1.414 | n/a   | 1.354 | n/a   | 0.3182 |
| 5E+06 | 14 | 1 | 1 | 1 | 8.093  | n/a   | 11.601 | 3.306 | 3.026 | 5.557 | 3.114 | n/a   | n/a   | n/a   | 1.796 | n/a   | 1.847 | n/a   | 0.5871 |
| 5E+06 | 14 | 1 | 1 | 1 | 5.938  | n/a   | 6.456  | 2.842 | 2.926 | 3.961 | 1.076 | n/a   | n/a   | n/a   | 1.217 | n/a   | 1.081 | n/a   | 0.0473 |
| 5E+06 | 14 | 1 | 1 | 2 | 11.921 | 1.167 | 11.398 | 3.306 | 3.013 | 5.578 | 2.842 | n/a   | n/a   | n/a   | 2.284 | n/a   | 2.386 | n/a   | 0.7483 |
| 5E+06 | 14 | 1 | 1 | 1 | 11.235 | n/a   | 11.075 | 3.247 | 3.409 | 5.221 | 2.151 | n/a   | n/a   | n/a   | 2.268 | n/a   | 2.34  | n/a   | 0.7447 |
| 5E+06 | 14 | 1 | 1 | 1 | 5.933  | n/a   | 7.921  | 3.043 | 2.886 | 4.009 | 1.014 | n/a   | n/a   | n/a   | 1.313 | n/a   | 1.143 | n/a   | 0.18   |
| 5E+06 | 14 | 1 | 1 | 1 | 14.028 | n/a   | 7.89   | 4.683 | 2.891 | 3.08  | 1.727 | n/a   | n/a   | n/a   | 1.277 | n/a   | 1.337 | n/a   | 0.1872 |
| 5E+06 | 14 | 1 | 1 | 1 | 5.452  | n/a   | 9.975  | 3.528 | 2.983 | 4.784 | 2.443 | n/a   | n/a   | n/a   | 1.945 | n/a   | 1.775 | n/a   | 0.6031 |
| 5E+06 | 14 | 1 | 1 | 1 | 11.531 | n/a   | 13.34  | 3.66  | 2.726 | 5.667 | 2.842 | n/a   | n/a   | n/a   | 1.436 | n/a   | 1.815 | n/a   | 0.5128 |
| 5E+06 | 15 | 1 | 1 | 1 | 6.467  | n/a   | 8.636  | 3.812 | 2.669 | 4.237 | 2.251 | n/a   | n/a   | n/a   | 1.115 | n/a   | 1.104 | n/a   | 0.2312 |
| 5E+06 | 15 | 1 | 1 | 1 | 6.068  | n/a   | 6.366  | 2.731 | 2.335 | 4.107 | 1.479 | n/a   | n/a   | n/a   | 1.04  | n/a   | 1.449 | n/a   | 0.0451 |
| 5E+06 | 15 | 1 | 1 | 1 | 6.943  | n/a   | 9.79   | 2.157 | 3.302 | 4.735 | 1.651 | n/a   | n/a   | n/a   | 1.291 | n/a   | 1.365 | n/a   | 0.3315 |
| 5E+06 | 15 | 1 | 1 | 2 | 7.386  | 3.448 | 7.598  | 3.183 | 2.837 | 4.333 | 1.37  | n/a   | n/a   | n/a   | 2.841 | n/a   | 2.709 | n/a   | 0.8552 |
| 5E+06 | 15 | 1 | 1 | 1 | 6.455  | n/a   | 6.99   | 2.405 | 2.801 | 3.879 | 1.014 | n/a   | n/a   | n/a   | 1.179 | n/a   | 1.152 | n/a   | 0.0962 |
| 5E+06 | 15 | 1 | 1 | 1 | 5.695  | n/a   | 7.864  | 2.591 | 3.383 | 5.223 | 1.958 | n/a   | n/a   | n/a   | 1.407 | n/a   | 1.184 | n/a   | 0.1824 |
| 5E+06 | 15 | 1 | 1 | 1 | 5.561  | n/a   | 10.222 | 2.405 | 2.645 | 4.979 | 2.109 | n/a   | n/a   | n/a   | 0.889 | n/a   | 1.427 | n/a   | 0.3448 |



|       |    |   |   |   |        |       |        |       |       |       |       |       |       |       |       |       |       |       |        |
|-------|----|---|---|---|--------|-------|--------|-------|-------|-------|-------|-------|-------|-------|-------|-------|-------|-------|--------|
| 5E+06 | 15 | 1 | 1 | 1 | 7.319  | n/a   | 9.395  | 2.654 | 2.505 | 4.209 | 1.579 | n/a   | n/a   | n/a   | 1.016 | n/a   | 1.567 | n/a   | 0.3077 |
| 5E+06 | 15 | 1 | 1 | 1 | 5.671  | n/a   | 9.063  | 2.855 | 2.688 | 4.456 | 1.705 | n/a   | n/a   | n/a   | 2.782 | n/a   | 2.753 | n/a   | 0.8362 |
| 5E+06 | 15 | 1 | 1 | 1 | 8.634  | n/a   | 8.284  | 2.495 | 3.114 | 4.586 | 1.771 | n/a   | n/a   | n/a   | 1.261 | n/a   | 1.554 | n/a   | 0.2362 |
| 5E+06 | 15 | 1 | 1 | 1 | 0.935  | n/a   | 10.173 | 3.271 | 3.247 | 3.931 | 1.283 | n/a   | n/a   | n/a   | 0.977 | n/a   | 1.399 | n/a   | 0.3422 |
| 5E+06 | 15 | 1 | 1 | 1 | 7.448  | n/a   | 10.859 | 2.63  | 3.271 | 5.594 | 2.61  | n/a   | n/a   | n/a   | 1.365 | n/a   | 1.723 | n/a   | 0.477  |
| 5E+06 | 15 | 1 | 2 | 2 | 15.671 | 4.887 | 8.334  | 4.877 | 3.159 | 4.047 | 1.513 | n/a   | 4.356 | 2.181 | 2.651 | n/a   | 1.675 | 1.643 | 0.8476 |
| 5E+06 | 15 | 1 | 1 | 1 | 7.046  | n/a   | 11.898 | 2.61  | 2.74  | 5.933 | 2.745 | n/a   | n/a   | n/a   | 2.165 | n/a   | 2.585 | n/a   | 0.759  |
| 5E+06 | 15 | 2 | 2 | 2 | 11.232 | 3.956 | 6.639  | 4.362 | 1.604 | 2.251 | 1.322 | 3.064 | 3.085 | 0.641 | 1.2   | 0.782 | 1.703 | 1.24  | 0.9019 |
| 5E+06 | 15 | 2 | 2 | 2 | 7.37   | 2.612 | 7.645  | 5.171 | 2.957 | 3.812 | 1.134 | 2.586 | 3.915 | 1.705 | 1.061 | 1.035 | 1.419 | 1.509 | 0.8706 |
| 5E+06 | 15 | 1 | 1 | 1 | 11.033 | n/a   | 10.697 | 2.296 | 3.247 | 5.782 | 3.047 | n/a   | n/a   | n/a   | 2.547 | n/a   | 2.555 | n/a   | 0.81   |
| 5E+06 | 15 | 1 | 1 | 1 | 12.583 | n/a   | 10.979 | 2.61  | 2.944 | 4.848 | 2.384 | n/a   | n/a   | n/a   | 1.934 | n/a   | 2.328 | n/a   | 0.6823 |
| 5E+06 | 15 | 1 | 1 | 1 | 4.988  | n/a   | 7.072  | 3.114 | 2.566 | 3.774 | 1.37  | n/a   | n/a   | n/a   | 1.049 | n/a   | 1.338 | n/a   | 0.103  |
| 5E+06 | 15 | 1 | 1 | 1 | 2.887  | n/a   | 11.515 | 3.702 | 3.195 | 5.622 | 2.411 | n/a   | n/a   | n/a   | 1.876 | n/a   | 2.574 | n/a   | 0.7236 |
| 5E+06 | 15 | 1 | 1 | 1 | 10.239 | n/a   | 11.564 | 2.759 | 3.561 | 6.169 | 2.801 | n/a   | n/a   | n/a   | 1.629 | n/a   | 2.762 | n/a   | 0.7132 |
| 5E+06 | 15 | 1 | 1 | 1 | 11.859 | n/a   | 12.85  | 2.768 | 2.768 | 5.683 | 2.74  | n/a   | n/a   | n/a   | 1.663 | n/a   | 2.194 | n/a   | 0.6421 |
| 5E+06 | 15 | 1 | 1 | 1 | 12.738 | n/a   | 11.855 | 3.043 | 2.443 | 4.906 | 2.904 | n/a   | n/a   | n/a   | 1.243 | n/a   | 1.513 | n/a   | 0.4392 |
| 5E+06 | 15 | 1 | 1 | 2 | 9.161  | 1.014 | 10.947 | 3.517 | 2.904 | 4.617 | 1.705 | n/a   | n/a   | n/a   | 2.192 | n/a   | 2.495 | n/a   | 0.7626 |
| 5E+06 | 15 | 1 | 1 | 1 | 9.338  | n/a   | 8.172  | 3.604 | 3.371 | 4.182 | 1.014 | n/a   | n/a   | n/a   | 1.436 | n/a   | 0.74  | n/a   | 0.1848 |
| 5E+06 | 15 | 1 | 1 | 1 | 9.521  | n/a   | 11.059 | 3.247 | 2.891 | 5.141 | 2.268 | n/a   | n/a   | n/a   | 0.811 | n/a   | 1.312 | n/a   | 0.3638 |
| 5E+06 | 15 | 1 | 1 | 1 | 4.37   | n/a   | 6.766  | 2.745 | 2.904 | 4.403 | 1.293 | n/a   | n/a   | n/a   | 1.285 | n/a   | 1.227 | n/a   | 0.085  |
| 5E+06 | 15 | 1 | 1 | 1 | 7.661  | n/a   | 7.022  | 2.591 | 2.296 | 3.702 | 1.521 | n/a   | n/a   | n/a   | 1.171 | n/a   | 1.389 | n/a   | 0.1053 |
| 5E+06 | 15 | 1 | 1 | 1 | 4.922  | n/a   | 8.856  | 2.268 | 2.405 | 4.047 | 2.091 | n/a   | n/a   | n/a   | 1.223 | n/a   | 1.357 | n/a   | 0.2766 |
| 5E+06 | 16 | 1 | 1 | 1 | 4.869  | n/a   | 6.99   | 2.251 | 2.586 | 3.812 | 1.814 | n/a   | n/a   | n/a   | 0.851 | n/a   | 1.74  | n/a   | 0.1007 |
| 5E+06 | 16 | 1 | 1 | 1 | 5.567  | n/a   | 9.293  | 2.268 | 2.996 | 5.063 | 2.427 | n/a   | n/a   | n/a   | 1.412 | n/a   | 1.456 | n/a   | 0.313  |
| 5E+06 | 16 | 2 | 2 | 2 | 7.005  | 2.32  | 7.699  | 5.452 | 2.535 | 3.586 | 0.975 | 2.654 | 3.462 | 0.864 | 1.169 | 1.042 | 1.209 | 1.768 | 0.8667 |
| 5E+06 | 16 | 1 | 1 | 1 | 5.701  | n/a   | 7.343  | 2.085 | 2.721 | 4.138 | n/a   | n/a   | n/a   | n/a   | 1.218 | n/a   | 1.378 | n/a   | 0.1305 |
| 5E+06 | 16 | 2 | 2 | 2 | 9.297  | 4.122 | 7.544  | 5.171 | 2.891 | 3.66  | n/a   | 2.891 | 4.009 | n/a   | 1.452 | 1.228 | 1.339 | 1.45  | 0.859  |
| 5E+06 | 16 | 1 | 1 | 1 | 11.817 | n/a   | 10.458 | 3.306 | 2.495 | 4.377 | 2.085 | n/a   | n/a   | n/a   | 1.762 | n/a   | 1.679 | n/a   | 0.5619 |
| 5E+06 | 16 | 2 | 2 | 2 | 8.12   | 3.621 | 6.807  | 5.176 | 2.855 | 4.16  | 1.579 | 3.043 | 3.812 | 1.027 | 1.079 | 1.15  | 1.474 | 1.44  | 0.894  |
| 5E+06 | 16 | 1 | 1 | 1 | 10.76  | n/a   | 12.632 | 3.754 | 3.337 | 4.979 | 2.489 | n/a   | n/a   | n/a   | 1.13  | n/a   | 1.65  | n/a   | 0.4623 |
| 5E+06 | 16 | 1 | 1 | 1 | 7.021  | n/a   | 11.231 | 3.183 | 3.383 | 5.485 | 2.405 | n/a   | n/a   | n/a   | 2.071 | n/a   | 1.781 | n/a   | 0.6323 |
| 5E+06 | 16 | 2 | 2 | 2 | 8.632  | 4.643 | 5.688  | 5.243 | 2.891 | 3.532 | 1.134 | 2.721 | 3.628 | 0.962 | 1.109 | 1.045 | 1.309 | 1.241 | 0.9258 |
| 5E+06 | 16 | 1 | 1 | 1 | 9.747  | n/a   | 9.975  | 2.768 | 2.869 | 4.981 | 2.489 | n/a   | n/a   | n/a   | 1.227 | n/a   | 1.338 | n/a   | 0.3368 |
| 5E+06 | 16 | 1 | 1 | 1 | 7.263  | n/a   | 6.203  | 2.745 | 2.891 | 3.754 | 1.283 | n/a   | n/a   | n/a   | 0.963 | n/a   | 1.361 | n/a   | 0.0213 |
| 5E+06 | 16 | 1 | 1 | 1 | 3.744  | n/a   | 7.171  | 2.645 | 2.645 | 3.402 | 1.167 | n/a   | n/a   | n/a   | 0.846 | n/a   | 1.414 | n/a   | 0.1121 |
| 5E+06 | 17 | 1 | 1 | 1 | 10.059 | n/a   | 10.682 | 3.207 | 2.944 | 4.333 | 1.931 | n/a   | n/a   | n/a   | 1.439 | n/a   | 1.729 | n/a   | 0.4948 |
| 5E+06 | 17 | 1 | 1 | 1 | 5.916  | n/a   | 7.759  | 3.905 | 3.151 | 4.172 | 1.793 | n/a   | n/a   | n/a   | 1.136 | n/a   | 1.18  | n/a   | 0.1681 |
| 5E+06 | 17 | 1 | 1 | 1 | 10.694 | n/a   | 10.199 | 2.957 | 3.013 | 5.352 | 2.645 | n/a   | n/a   | n/a   | 1.072 | n/a   | 1.31  | n/a   | 0.3475 |
| 5E+06 | 17 | 1 | 1 | 1 | 5.883  | n/a   | 6.822  | 2.654 | 2.489 | 3.967 | 1.452 | n/a   | n/a   | n/a   | 1.274 | n/a   | 1.396 | n/a   | 0.0917 |
| 5E+06 | 17 | 1 | 1 | 1 | 8.003  | n/a   | 10.363 | 3.097 | 3.013 | 4.333 | 1.958 | n/a   | n/a   | n/a   | 1.207 | n/a   | 1.508 | n/a   | 0.3885 |
| 5E+06 | 17 | 1 | 1 | 1 | 8.859  | n/a   | 10.454 | 3.532 | 2.731 | 4.877 | 2.296 | n/a   | n/a   | n/a   | 1.514 | n/a   | 1.376 | n/a   | 0.4249 |
| 5E+06 | 17 | 1 | 1 | 1 | 12.619 | n/a   | 6.446  | 4.022 | 2.891 | 3.462 | 0.935 | n/a   | n/a   | n/a   | 1.389 | n/a   | 1.406 | n/a   | 0.0671 |
| 5E+06 | 17 | 1 | 1 | 1 | 7.304  | n/a   | 9.791  | 3.469 | 3.29  | 5.966 | 2.443 | n/a   | n/a   | n/a   | 1.392 | n/a   | 1.653 | n/a   | 0.4306 |
| 5E+06 | 17 | 1 | 1 | 1 | 6.238  | n/a   | 8.334  | 2.996 | 2.535 | 4.628 | 2.571 | n/a   | n/a   | n/a   | 0.99  | n/a   | 1.166 | n/a   | 0.1945 |
| 5E+06 | 17 | 1 | 1 | 1 | 14.301 | n/a   | 11.231 | 3.402 | 2.944 | 4.824 | 1.924 | n/a   | n/a   | n/a   | 1.938 | n/a   | 1.494 | n/a   | 0.5556 |
| 5E+06 | 17 | 1 | 1 | 1 | 7.627  | n/a   | 8.754  | 3.302 | 2.768 | 4.098 | 2.085 | n/a   | n/a   | n/a   | 1.552 | n/a   | 1.452 | n/a   | 0.2869 |
| 5E+06 | 17 | 1 | 1 | 1 | 8.193  | n/a   | 6.414  | 3.532 | 2.028 | 3.432 | 1.651 | n/a   | n/a   | n/a   | 0.844 | n/a   | 1.017 | n/a   | 0.0278 |
| 5E+06 | 17 | 1 | 1 | 2 | 5.749  | 1.123 | 10.99  | 3.604 | 3.163 | 4.805 | 1.793 | n/a   | n/a   | n/a   | 2.459 | n/a   | 2.324 | n/a   | 0.7806 |
| 5E+06 | 17 | 1 | 1 | 1 | 10.199 | n/a   | 10.622 | 3.114 | 2.505 | 5.968 | 3.227 | n/a   | n/a   | n/a   | 1.288 | n/a   | 1.644 | n/a   | 0.4363 |
| 5E+06 | 17 | 1 | 1 | 1 | 8.898  | n/a   | 11.626 | 3.227 | 3.114 | 4.625 | 2.009 | n/a   | n/a   | n/a   | 1.152 | n/a   | 1.181 | n/a   | 0.394  |
| 5E+06 | 17 | 1 | 1 | 1 | 5.083  | n/a   | 6.749  | 2.855 | 3.532 | 4.234 | 1.027 | n/a   | n/a   | n/a   | 1.246 | n/a   | 0.811 | n/a   | 0.0693 |
| 5E+06 | 17 | 1 | 1 | 1 | 4.022  | n/a   | 6.592  | 3.532 | 2.74  | 3.931 | 1.134 | n/a   | n/a   | n/a   | 1.492 | n/a   | 1.152 | n/a   | 0.0782 |
| 5E+06 | 17 | 1 | 1 | 1 | 14.99  | n/a   | 11.462 | 2.63  | 3.175 | 5.837 | 2.51  | n/a   | n/a   | n/a   | 1.352 | n/a   | 1.492 | n/a   | 0.445  |
| 5E+06 | 17 | 1 | 1 | 1 | 7.701  | n/a   | 10.945 | 3.064 | 2.61  | 5.695 | 3.085 | n/a   | n/a   | n/a   | 1.304 | n/a   | 1.608 | n/a   | 0.4421 |
| 5E+06 | 17 | 1 | 1 | 1 | 5.75   | n/a   | 7.429  | 3.348 | 2.996 | 4.123 | 2.091 | n/a   | n/a   | n/a   | 1.133 | n/a   | 1.075 | n/a   | 0.1259 |
| 5E+06 | 17 | 1 | 1 | 1 | 6.498  | n/a   | 6.494  | 3.247 | 2.669 | 4.022 | 1.37  | n/a   | n/a   | n/a   | 1.04  | n/a   | 0.973 | n/a   | 0.0364 |
| 5E+06 | 17 | 1 | 1 | 1 | 11.473 | n/a   | 11.089 | 3.163 | 2.869 | 5.236 | 1.87  | n/a   | n/a   | n/a   | 1.478 | n/a   | 1.316 | n/a   | 0.4221 |
| 5E+06 | 17 | 1 | 1 | 1 | 4.267  | n/a   | 7.539  | 2.448 | 2.948 | 3.604 | 0.717 | n/a   | n/a   | n/a   | 0.93  | n/a   | 1.055 | n/a   | 0.1282 |
| 5E+06 | 17 | 1 | 2 | 2 | 7.429  | 2.336 | 6.106  | 4.218 | 2.109 | 2.837 | 1.513 | n/a   | 3.043 | 1.156 | 2.011 | n/a   | 1.197 | 0.965 | 0.9501 |
| 5E+06 | 18 | 1 | 1 | 1 | 11.896 | n/a   | 10.79  | 3.348 | n/a   | n/a   | n/a   | n/a   | n/a   | n/a   | 0.996 | n/a   | 1.258 | n/a   | 0.3611 |
| 5E+06 | 18 | 2 | 2 | 2 | 13.364 | 5.298 | 5.831  | 5.426 | 2.891 | 3.879 | 0.661 | 3.306 | 3.013 | 0.661 | 1.01  | 0.712 | 1.436 | 1.053 | 0.946  |
| 5E+06 | 18 | 2 | 2 | 1 | 5.18   | n/a   | 8.621  | 3.064 | 2.591 | 4.197 | 1.521 | n/a   | n/a   | n/a   | 1.318 | 1.278 | 1.421 | 1.29  | 0.8438 |
| 5E+06 | 18 | 1 | 1 | 1 | 7.5    | n/a   | 7.948  | 2.886 | 2.731 | 4.473 | 2.085 | n/a   | n/a   | n/a   | 1.5   | n/a   | 1.413 | n/a   | 0.2066 |
| 5E+06 | 18 | 1 | 1 | 1 | 6.319  | n/a   | 8.692  | 2.869 | 2.842 | 4.595 | 2.157 | n/a   | n/a   | n/a   | 0.92  | n/a   | 1.146 | n/a   | 0.2238 |
| 5E+06 | 18 | 1 | 1 | 1 | 13.009 | n/a   | 10.803 | 3.223 | 2.61  | 4.493 | 2.591 | n/a   | n/a   | n/a   | 1.92  | n/a   | 1.458 | n/a   | 0.5463 |

|       |    |   |   |   |        |       |        |       |       |       |       |       |       |       |       |       |       |       |        |
|-------|----|---|---|---|--------|-------|--------|-------|-------|-------|-------|-------|-------|-------|-------|-------|-------|-------|--------|
| 5E+06 | 18 | 1 | 1 | 2 | 7.349  | 1.134 | 11.61  | 3.55  | 3.085 | 5.631 | 2.731 | n/a   | n/a   | n/a   | 2.337 | n/a   | 2.156 | n/a   | 0.7341 |
| 5E+06 | 18 | 1 | 1 | 1 | 4.199  | n/a   | 6.194  | 2.74  | 2.489 | 3.207 | 1.293 | n/a   | n/a   | n/a   | 0.719 | n/a   | 1.297 | n/a   | 0.0149 |
| 5E+06 | 18 | 1 | 1 | 1 | 14.101 | n/a   | 8.194  | 3.29  | 2.505 | 4.261 | 2.61  | n/a   | n/a   | n/a   | 1.047 | n/a   | 1.44  | n/a   | 0.2042 |
| 5E+06 | 18 | 1 | 1 | 1 | 3.693  | n/a   | 10.905 | 3.085 | 2.944 | 4.94  | 2.586 | n/a   | n/a   | n/a   | 2.372 | n/a   | 2.417 | n/a   | 0.7879 |
| 5E+06 | 18 | 1 | 1 | 1 | 11.46  | n/a   | 10.076 | 2.983 | 2.157 | 5.094 | 2.335 | n/a   | n/a   | n/a   | 1.61  | n/a   | 1.335 | n/a   | 0.4193 |
| 5E+06 | 18 | 1 | 2 | 2 | 12.762 | 3.466 | 7.89   | 4.716 | 2.405 | 3.657 | 1.735 | n/a   | 3.875 | 2.384 | 2.356 | n/a   | 1.191 | 1.257 | 0.8822 |
| 5E+06 | 18 | 1 | 1 | 1 | 7.944  | n/a   | 8.297  | 2.837 | 3.163 | 5.134 | 2.279 | n/a   | n/a   | n/a   | 1.098 | n/a   | 1.176 | n/a   | 0.1993 |
| 5E+06 | 18 | 1 | 1 | 1 | 8.893  | n/a   | 11.697 | 2.805 | 3.247 | 5.748 | 2.996 | n/a   | n/a   | n/a   | 2.316 | n/a   | 1.982 | n/a   | 0.7063 |
| 5E+06 | 18 | 1 | 1 | 1 | 11.664 | n/a   | 12.591 | 3.785 | 2.61  | 5.253 | 2.181 | n/a   | n/a   | n/a   | 1.717 | n/a   | 1.39  | n/a   | 0.4799 |
| 5E+06 | 18 | 1 | 1 | 1 | 9.274  | n/a   | 11.987 | 3.398 | 3.306 | 5.775 | 3.371 | n/a   | n/a   | n/a   | 2.339 | n/a   | 2.086 | n/a   | 0.7201 |
| 5E+06 | 18 | 1 | 1 | 1 | 10.723 | n/a   | 7.13   | 2.405 | 2.688 | 3.55  | 1.167 | n/a   | n/a   | n/a   | 1.318 | n/a   | 1.034 | n/a   | 0.1098 |
| 5E+06 | 18 | 1 | 1 | 1 | 7.102  | n/a   | 8.878  | 3.302 | 2.535 | 4.501 | 1.87  | n/a   | n/a   | n/a   | 1.381 | n/a   | 1.068 | n/a   | 0.269  |
| 5E+06 | 18 | 1 | 1 | 1 | 14.456 | n/a   | 11.202 | 3.812 | 2.489 | 6.24  | 3.825 | n/a   | n/a   | n/a   | 1.176 | n/a   | 1.112 | n/a   | 0.3775 |
| 5E+06 | 18 | 1 | 1 | 1 | 9.948  | n/a   | 11.833 | 3.586 | 3.085 | 5.379 | 2.505 | n/a   | n/a   | n/a   | 1.486 | n/a   | 1.779 | n/a   | 0.5188 |
| 5E+06 | 18 | 1 | 1 | 1 | 15.78  | n/a   | 12.322 | 3.757 | 2.61  | 5.338 | 2.983 | n/a   | n/a   | n/a   | 1.434 | n/a   | 1.678 | n/a   | 0.4858 |
| 5E+06 | 18 | 1 | 1 | 1 | 5.812  | n/a   | 6.897  | 2.405 | 3.114 | 3.879 | 1.587 | n/a   | n/a   | n/a   | 0.922 | n/a   | 0.989 | n/a   | 0.0805 |
| 5E+06 | 18 | 1 | 1 | 1 | 11.242 | n/a   | 7.207  | 2.091 | 2.411 | 3.604 | 1.379 | n/a   | n/a   | n/a   | 1.136 | n/a   | 1.046 | n/a   | 0.1076 |
| 1E+07 | 1  | 1 | 1 | 1 | 6.685  | n/a   | 7.347  | 2.029 | 2.27  | 3.504 | 1.673 | n/a   | n/a   | n/a   | 0.98  | n/a   | 1.12  | n/a   | 0.1346 |
| 1E+07 | 1  | 1 | 1 | 1 | 6.981  | n/a   | 7.596  | 2.441 | 2.438 | 4.579 | 2.358 | n/a   | n/a   | n/a   | 1.097 | n/a   | 1.159 | n/a   | 0.1545 |
| 1E+07 | 1  | 1 | 1 | 1 | 6.827  | n/a   | 9.058  | 2.073 | 2.214 | 4.057 | 1.894 | n/a   | n/a   | n/a   | 1.454 | n/a   | 1.117 | n/a   | 0.2803 |
| 1E+07 | 1  | 1 | 1 | 1 | 8.69   | n/a   | 10.579 | 2.491 | 2.313 | 3.629 | 1.55  | n/a   | n/a   | n/a   | 0.615 | n/a   | 0.997 | n/a   | 0.3446 |
| 1E+07 | 1  | 1 | 1 | 1 | 5.481  | n/a   | 7.309  | 2.313 | 2.441 | 3.895 | 1.823 | n/a   | n/a   | n/a   | 0.66  | n/a   | 1.169 | n/a   | 0.1125 |
| 1E+07 | 1  | 1 | 1 | 1 | 6.192  | n/a   | 7.309  | 2.313 | 1.894 | 3.278 | 1.462 | n/a   | n/a   | n/a   | 0.802 | n/a   | 1.137 | n/a   | 0.1149 |
| 1E+07 | 1  | 1 | 1 | 1 | 6.075  | n/a   | 6.693  | 2.434 | 2.029 | 3.814 | 1.787 | n/a   | n/a   | n/a   | 0.796 | n/a   | 1.077 | n/a   | 0.0764 |
| 1E+07 | 2  | 1 | 1 | 2 | 9.29   | 0.309 | 13.533 | 2.678 | 2.434 | 5.745 | 3.39  | n/a   | n/a   | n/a   | 1.18  | n/a   | 1.407 | n/a   | 0.4922 |
| 1E+07 | 2  | 1 | 1 | 1 | 8.778  | n/a   | 11.349 | 2.274 | 2.566 | 4.163 | 1.607 | n/a   | n/a   | n/a   | 2.007 | n/a   | 1.773 | n/a   | 0.6389 |
| 1E+07 | 2  | 1 | 1 | 1 | 6.318  | n/a   | 8.43   | 1.814 | 2.073 | 2.441 | 2.441 | n/a   | n/a   | n/a   | 0.517 | n/a   | 1.075 | n/a   | 0.1696 |
| 1E+07 | 2  | 1 | 1 | 1 | 11.8   | n/a   | 12.396 | 2.995 | 2.181 | 5.824 | 3.827 | n/a   | n/a   | n/a   | 1.413 | n/a   | 1.751 | n/a   | 0.5308 |
| 1E+07 | 2  | 1 | 1 | 1 | 5.829  | n/a   | 6.098  | 2.578 | 2.366 | 3.367 | 1.339 | n/a   | n/a   | n/a   | 0.829 | n/a   | 0.977 | n/a   | 0.0319 |
| 1E+07 | 2  | 1 | 1 | 1 | 9.407  | n/a   | 11.594 | 2.617 | 1.545 | 3.21  | 1.942 | n/a   | n/a   | n/a   | 1.964 | n/a   | 1.901 | n/a   | 0.6495 |
| 1E+07 | 2  | 1 | 1 | 1 | 9.799  | n/a   | 12.03  | 2.976 | 2.196 | 3.755 | 1.711 | n/a   | n/a   | n/a   | 1.876 | n/a   | 1.908 | n/a   | 0.646  |
| 1E+07 | 3  | 2 | 2 | 2 | 8.281  | 5.558 | 6.778  | 4.649 | 2.464 | 2.817 | 1.147 | 2.451 | 4.01  | 1.673 | 0.755 | 0.677 | 0.958 | 1.051 | 1      |
| 1E+07 | 3  | 1 | 1 | 1 | 13.691 | n/a   | 7.777  | 2.53  | 2.718 | 3.917 | 1.496 | n/a   | n/a   | n/a   | 0.878 | n/a   | 1.028 | n/a   | 0.157  |
| 1E+07 | 4  | 1 | 1 | 1 | 9.078  | n/a   | 11.578 | 2.869 | 2.594 | 5.062 | 2.468 | n/a   | n/a   | n/a   | 2.359 | n/a   | 2.402 | n/a   | 0.775  |
| 1E+07 | 5  | 1 | 1 | 1 | 8.91   | n/a   | 8.557  | 2.578 | 2.642 | 3.983 | 1.687 | n/a   | n/a   | n/a   | 1.145 | n/a   | 1.37  | n/a   | 0.2345 |
| 1E+07 | 5  | 1 | 1 | 1 | 4.256  | n/a   | 7.934  | 2.746 | 2.069 | 4.131 | 2.073 | n/a   | n/a   | n/a   | 0.536 | n/a   | 0.987 | n/a   | 0.152  |
| 1E+07 | 5  | 1 | 1 | 1 | 4.946  | n/a   | 11.571 | 2.434 | 2.451 | 4.67  | 2.41  | n/a   | n/a   | n/a   | 0.91  | n/a   | 1.35  | n/a   | 0.4393 |
| 1E+07 | 5  | 1 | 1 | 1 | 12.078 | n/a   | 10.737 | 2.434 | 2.341 | 4.026 | 1.823 | n/a   | n/a   | n/a   | 1.144 | n/a   | 0.982 | n/a   | 0.3971 |
| 1E+07 | 5  | 1 | 1 | 1 | 11.082 | n/a   | 12.475 | 2.849 | 2.645 | 4.952 | 2.366 | n/a   | n/a   | n/a   | 0.909 | n/a   | 1.337 | n/a   | 0.4671 |
| 1E+07 | 5  | 1 | 1 | 1 | 10.047 | n/a   | 10.293 | 2.464 | 2.323 | 4.392 | 2.192 | n/a   | n/a   | n/a   | 1.917 | n/a   | 1.863 | n/a   | 0.625  |
| 1E+07 | 5  | 1 | 1 | 1 | 11.072 | n/a   | 14.126 | 3.631 | 2.451 | 4.362 | 2.214 | n/a   | n/a   | n/a   | 1.576 | n/a   | 1.442 | n/a   | 0.5049 |
| 1E+07 | 5  | 1 | 1 | 1 | 15.464 | n/a   | 11.646 | 2.645 | 2.421 | 5.088 | 2.67  | n/a   | n/a   | n/a   | 1.915 | n/a   | 1.754 | n/a   | 0.6043 |
| 1E+07 | 5  | 1 | 1 | 1 | 12.22  | n/a   | 11.141 | 2.582 | 3.103 | 4.877 | 1.962 | n/a   | n/a   | n/a   | 1.686 | n/a   | 1.884 | n/a   | 0.5872 |
| 1E+07 | 5  | 1 | 1 | 1 | 8.646  | n/a   | 8.858  | 3.207 | 3.05  | 4.448 | 1.566 | n/a   | n/a   | n/a   | 0.942 | n/a   | 1.849 | n/a   | 0.2694 |
| 1E+07 | 6  | 2 | 2 | 2 | 12.922 | 6.049 | 6.391  | 4.099 | 1.796 | 2.894 | 1.217 | 2.029 | 3.207 | 1.182 | 0.851 | 1.108 | 1.249 | 1.042 | 0.9955 |
| 1E+07 | 6  | 1 | 1 | 1 | 13.178 | n/a   | 13.691 | 2.241 | 2.241 | 4.89  | 2.822 | n/a   | n/a   | n/a   | 1.863 | n/a   | 1.772 | n/a   | 0.5805 |
| 1E+07 | 6  | 1 | 1 | 1 | 15.097 | n/a   | 10.138 | 1.726 | 2.358 | 4.177 | 2.295 | n/a   | n/a   | n/a   | 0.657 | n/a   | 0.971 | n/a   | 0.3023 |
| 1E+07 | 6  | 1 | 1 | 1 | 7.334  | n/a   | 8.903  | 2.181 | 2.192 | 4.057 | 1.687 | n/a   | n/a   | n/a   | 0.913 | n/a   | 1.072 | n/a   | 0.2398 |
| 1E+07 | 6  | 1 | 1 | 1 | 11.047 | n/a   | 8.665  | 2.386 | 2.284 | 4.773 | 2.645 | n/a   | n/a   | n/a   | 0.934 | n/a   | 1.08  | n/a   | 0.216  |
| 1E+07 | 6  | 1 | 1 | 1 | 14.33  | n/a   | 8.314  | 2.386 | 2.088 | 4.249 | 2.358 | n/a   | n/a   | n/a   | 1.109 | n/a   | 1.338 | n/a   | 0.2108 |
| 1E+07 | 6  | 1 | 1 | 1 | 8.813  | n/a   | 11.864 | 2.366 | 2.421 | 3.674 | 1.308 | n/a   | n/a   | n/a   | 1.12  | n/a   | 1.367 | n/a   | 0.4639 |
| 1E+07 | 6  | 1 | 1 | 1 | 6.999  | n/a   | 10.307 | 2.185 | 2.241 | 3.902 | 1.85  | n/a   | n/a   | n/a   | 0.904 | n/a   | 1.142 | n/a   | 0.3504 |
| 1E+07 | 6  | 1 | 1 | 1 | 8.302  | n/a   | 8.662  | 1.837 | 2.116 | 3.346 | 1.711 | n/a   | n/a   | n/a   | 1.094 | n/a   | 1.014 | n/a   | 0.2239 |
| 1E+07 | 6  | 1 | 1 | 1 | 8.128  | n/a   | 12.048 | 2.727 | 2.746 | 4.65  | 2.366 | n/a   | n/a   | n/a   | 1.529 | n/a   | 1.552 | n/a   | 0.5146 |
| 1E+07 | 6  | 1 | 1 | 1 | 14.444 | n/a   | 10.045 | 2.341 | 2.214 | 3.594 | 1.745 | n/a   | n/a   | n/a   | 0.907 | n/a   | 1.168 | n/a   | 0.3332 |
| 1E+07 | 6  | 1 | 1 | 1 | 6.598  | n/a   | 8.356  | 2.069 | 2.323 | 3.53  | 1.496 | n/a   | n/a   | n/a   | 0.93  | n/a   | 1.342 | n/a   | 0.2056 |
| 1E+07 | 6  | 1 | 1 | 1 | 7.474  | n/a   | 10.524 | 2.678 | 2.438 | 3.85  | 1.545 | n/a   | n/a   | n/a   | 1.118 | n/a   | 1.224 | n/a   | 0.3942 |
| 1E+07 | 6  | 1 | 1 | 1 | 7.804  | n/a   | 9.626  | 2.468 | 2.341 | 3.27  | 1.089 | n/a   | n/a   | n/a   | 0.869 | n/a   | 1.493 | n/a   | 0.3163 |
| 1E+07 | 6  | 1 | 1 | 2 | 9.326  | 0.258 | 10.654 | 2.814 | 2.566 | 4.775 | 2.478 | n/a   | n/a   | n/a   | 2.047 | n/a   | 2.262 | n/a   | 0.7109 |
| 1E+07 | 7  | 1 | 1 | 1 | 8.365  | n/a   | 7.579  | 0.807 | 2.578 | 3.522 | 0.977 | n/a   | n/a   | n/a   | 0.608 | n/a   | 0.924 | n/a   | 0.1296 |
| 1E+07 | 7  | 1 | 1 | 1 | 8.048  | n/a   | 9.149  | 2.004 | 2.27  | 3.902 | 2.313 | n/a   | n/a   | n/a   | 1.092 | n/a   | 0.935 | n/a   | 0.2531 |
| 1E+07 | 7  | 1 | 1 | 1 | 6.705  | n/a   | 9.866  | 2.491 | 2.468 | 4.137 | 1.545 | n/a   | n/a   | n/a   | 1.047 | n/a   | 1.253 | n/a   | 0.3389 |
| 1E+07 | 7  | 1 | 1 | 1 | 10.327 | n/a   | 11.644 | 2.313 | 2.448 | 5.39  | 3.122 | n/a   | n/a   | n/a   | 0.75  | n/a   | 0.988 | n/a   | 0.3912 |
| 1E+07 | 7  | 1 | 1 | 1 | 6.542  | n/a   | 6.908  | 2.069 | 2.358 | 3.79  | 1.321 | n/a   | n/a   | n/a   | 1.119 | n/a   | 0.996 | n/a   | 0.0979 |
| 1E+07 | 8  | 1 | 1 | 1 | 13.29  | n/a   | 8.955  | 2.309 | 2.826 | 5.773 | 2.834 | n/a   | n/a   | n/a   | 1.56  | n/a   | 1.844 | n/a   | 0.5737 |

|       |    |   |   |   |        |       |        |       |       |       |       |       |       |       |       |       |       |       |        |
|-------|----|---|---|---|--------|-------|--------|-------|-------|-------|-------|-------|-------|-------|-------|-------|-------|-------|--------|
| 1E+07 | 8  | 1 | 1 | 1 | 13.622 | n/a   | 11.894 | 2.491 | 2.323 | 4.388 | 2.123 | n/a   | n/a   | n/a   | 1.447 | n/a   | 1.86  | n/a   | 0.5471 |
| 1E+07 | 9  | 1 | 1 | 1 | 8.169  | n/a   | 10.612 | 1.929 | 2.578 | 4.282 | 1.587 | n/a   | n/a   | n/a   | 1.173 | n/a   | 1.47  | n/a   | 0.4332 |
| 1E+07 | 9  | 1 | 1 | 1 | 6.517  | n/a   | 7.055  | 1.434 | 2.004 | 2.746 | 0.748 | n/a   | n/a   | n/a   | 0.647 | n/a   | 1.107 | n/a   | 0.0955 |
| 1E+07 | 9  | 1 | 1 | 1 | 5.543  | n/a   | 9.065  | 2.185 | 2.323 | 4.251 | 1.837 | n/a   | n/a   | n/a   | 0.752 | n/a   | 1.14  | n/a   | 0.2478 |
| 1E+07 | 9  | 1 | 1 | 1 | 13.528 | n/a   | 11.424 | 2.826 | 2.15  | 4.512 | 2.366 | n/a   | n/a   | n/a   | 2.019 | n/a   | 1.915 | n/a   | 0.6637 |
| 1E+07 | 9  | 1 | 1 | 1 | 20.834 | n/a   | 11.628 | 2.642 | 2.645 | 5.29  | 2.491 | n/a   | n/a   | n/a   | 1.102 | n/a   | 1.656 | n/a   | 0.4827 |
| 1E+07 | 9  | 1 | 1 | 1 | 10.022 | n/a   | 6.71   | 2.214 | 1.962 | 3.895 | 1.954 | n/a   | n/a   | n/a   | 0.983 | n/a   | 1.167 | n/a   | 0.0811 |
| 1E+07 | 10 | 1 | 1 | 1 | 7.675  | n/a   | 12.284 | 2.451 | 2.478 | 4.997 | 2.775 | n/a   | n/a   | n/a   | 1.07  | n/a   | 1.495 | n/a   | 0.4764 |
| 1E+07 | 11 | 1 | 1 | 1 | 12.89  | n/a   | 13.034 | 2.566 | 2.645 | 5.285 | 3.335 | n/a   | n/a   | n/a   | 2.7   | n/a   | 2.045 | n/a   | 0.7597 |
| 1E+07 | 11 | 1 | 1 | 1 | 12.522 | n/a   | 11.772 | 1.382 | 2.309 | 4.902 | 2.569 | n/a   | n/a   | n/a   | 1.729 | n/a   | 1.297 | n/a   | 0.5081 |
| 1E+07 | 11 | 1 | 1 | 1 | 4.983  | n/a   | 6.563  | 2.451 | 1.796 | 3.613 | 1.712 | n/a   | n/a   | n/a   | 2.998 | n/a   | 2.098 | n/a   | 0.9168 |
| 1E+07 | 11 | 1 | 1 | 1 | 11.411 | n/a   | 12.596 | 2.569 | 3.082 | 5.044 | 2.67  | n/a   | n/a   | n/a   | 2.734 | n/a   | 2.238 | n/a   | 0.7867 |
| 1E+07 | 11 | 1 | 1 | 1 | 10.745 | n/a   | 6.852  | 2.925 | 2.069 | 3.387 | 1.668 | n/a   | n/a   | n/a   | 1.896 | n/a   | 1.373 | n/a   | 0.1371 |
| 1E+07 | 11 | 1 | 1 | 2 | 14.863 | 3.085 | 8.814  | 3.338 | 3.49  | 5.576 | 2.645 | n/a   | n/a   | n/a   | 3.318 | n/a   | 2.659 | n/a   | 0.8625 |
| 1E+07 | 11 | 1 | 1 | 1 | 11.72  | n/a   | 7.757  | 2.775 | 2.491 | 3.851 | 1.308 | n/a   | n/a   | n/a   | 1.704 | n/a   | 1.409 | n/a   | 0.1978 |
| 1E+07 | 11 | 1 | 1 | 1 | 9.76   | n/a   | 10.71  | 2.437 | 2.848 | 4.618 | 2.962 | n/a   | n/a   | n/a   | 1.781 | n/a   | 1.595 | n/a   | 0.5571 |
| 1E+07 | 11 | 1 | 1 | 1 | 16.306 | n/a   | 11.375 | 2.192 | 2.775 | 4.648 | 3.1   | n/a   | n/a   | n/a   | 2.655 | n/a   | 1.917 | n/a   | 0.7445 |
| 1E+07 | 11 | 1 | 1 | 1 | 10.23  | n/a   | 11.474 | 2.579 | 2.769 | 4.618 | 2.743 | n/a   | n/a   | n/a   | 2.394 | n/a   | 2.387 | n/a   | 0.7789 |
| 1E+07 | 11 | 1 | 1 | 1 | 7.546  | n/a   | 6.031  | 2.67  | 2.313 | 3.985 | 1.434 | n/a   | n/a   | n/a   | 1.411 | n/a   | 1.524 | n/a   | 0.0575 |
| 1E+07 | 11 | 1 | 1 | 1 | 6.012  | n/a   | 5.936  | 3.09  | 1.941 | 2.769 | 1.566 | n/a   | n/a   | n/a   | 2.061 | n/a   | 1.916 | n/a   | 0.9296 |
| 1E+07 | 11 | 1 | 1 | 1 | 10.004 | n/a   | 5.92   | 2.491 | 1.721 | 2.848 | 0.811 | n/a   | n/a   | n/a   | 1.519 | n/a   | 1.422 | n/a   | 0.0435 |
| 1E+07 | 11 | 1 | 1 | 1 | 8.16   | n/a   | 9.246  | 2.365 | 2.883 | 4.599 | 2.27  | n/a   | n/a   | n/a   | 1.754 | n/a   | 1.628 | n/a   | 0.567  |
| 1E+07 | 11 | 1 | 1 | 1 | 4.868  | n/a   | 6.605  | 2.028 | 3.09  | 3.859 | 1.411 | n/a   | n/a   | n/a   | 1.672 | n/a   | 1.164 | n/a   | 0.1003 |
| 1E+07 | 12 | 1 | 1 | 1 | 12.43  | n/a   | 11.489 | 2.478 | 2.822 | 5.414 | 2.582 | n/a   | n/a   | n/a   | 1.67  | n/a   | 1.287 | n/a   | 0.4954 |
| 1E+07 | 12 | 1 | 1 | 1 | 6.273  | n/a   | 7.192  | 2.814 | 2.185 | 3.857 | 1.155 | n/a   | n/a   | n/a   | 2.12  | n/a   | 1.363 | n/a   | 0.9382 |
| 1E+07 | 12 | 1 | 1 | 1 | 8.001  | n/a   | 11.363 | 2.925 | 2.309 | 3.548 | 1.434 | n/a   | n/a   | n/a   | 2.004 | n/a   | 1.877 | n/a   | 0.653  |
| 1E+07 | 12 | 1 | 1 | 1 | 12.152 | n/a   | 9.269  | 2.053 | 2.088 | 5.131 | 3.756 | n/a   | n/a   | n/a   | 2.097 | n/a   | 2.667 | n/a   | 0.8707 |
| 1E+07 | 12 | 1 | 1 | 1 | 8.082  | n/a   | 7.892  | 2.27  | 2.284 | 3.808 | 1.712 | n/a   | n/a   | n/a   | 1.428 | n/a   | 1.376 | n/a   | 0.1875 |
| 1E+07 | 12 | 1 | 1 | 1 | 8.444  | n/a   | 10.93  | 2.491 | 2.697 | 4.774 | 1.668 | n/a   | n/a   | n/a   | 1.896 | n/a   | 2.092 | n/a   | 0.6673 |
| 1E+07 | 12 | 1 | 1 | 1 | 9.1    | n/a   | 9.724  | 2.088 | 1.958 | 5.01  | 2.883 | n/a   | n/a   | n/a   | 4.321 | n/a   | 2.807 | n/a   | 0.8301 |
| 1E+07 | 12 | 1 | 1 | 1 | 11.639 | n/a   | 6.97   | 2.721 | 1.941 | 4.682 | 2.116 | n/a   | n/a   | n/a   | 1.736 | n/a   | 1.556 | n/a   | 0.142  |
| 1E+07 | 12 | 1 | 1 | 1 | 6.583  | n/a   | 8.614  | 2.284 | 1.929 | 2.769 | 1.034 | n/a   | n/a   | n/a   | 0.912 | n/a   | 0.828 | n/a   | 0.1849 |
| 1E+07 | 12 | 2 | 2 | 2 | 8.897  | 1.965 | 6.986  | 3.747 | 2.632 | 3.791 | 0.77  | 2.359 | 3.423 | 10.26 | 1.734 | 1.484 | 1.422 | 1.593 | 0.9041 |
| 1E+07 | 12 | 1 | 1 | 1 | 12.849 | n/a   | 10.982 | 2.579 | 2.579 | 3.53  | 1.643 | n/a   | n/a   | n/a   | 1.221 | n/a   | 1.235 | n/a   | 0.4271 |
| 1E+07 | 12 | 1 | 1 | 1 | 8.299  | n/a   | 7.724  | 2.053 | 2.196 | 3.925 | 1.566 | n/a   | n/a   | n/a   | 1.686 | n/a   | 1.592 | n/a   | 0.2082 |
| 1E+07 | 12 | 1 | 1 | 1 | 4.97   | n/a   | 5.478  | 2.718 | 2.323 | 3.594 | 1.155 | n/a   | n/a   | n/a   | 2.034 | n/a   | 1.733 | n/a   | 0.9339 |
| 1E+07 | 12 | 1 | 1 | 1 | 8.656  | n/a   | 12.496 | 2.313 | 2.527 | 4.362 | 1.814 | n/a   | n/a   | n/a   | 2.524 | n/a   | 2.557 | n/a   | 0.7905 |
| 1E+07 | 13 | 2 | 2 | 1 | 5.3    | n/a   | 9.197  | 3.278 | 2.825 | 4.131 | 2.004 | n/a   | n/a   | n/a   | 2.433 | 2.452 | 2.088 | 1.912 | 0.8381 |
| 1E+07 | 13 | 1 | 1 | 1 | 6.922  | n/a   | 10.079 | 2.54  | 2.775 | 5.01  | 2.816 | n/a   | n/a   | n/a   | 2.372 | n/a   | 2.586 | n/a   | 0.8102 |
| 1E+07 | 13 | 1 | 1 | 1 | 2.717  | n/a   | 6.474  | 1.814 | 2.814 | 3.084 | 1.264 | n/a   | n/a   | n/a   | 1.691 | n/a   | 1.3   | n/a   | 0.0907 |
| 1E+07 | 13 | 1 | 1 | 1 | 2.805  | n/a   | 5.336  | 3.238 | 2.069 | 2.825 | 1.814 | n/a   | n/a   | n/a   | 1.179 | n/a   | 1.429 | n/a   | 0.0045 |
| 1E+07 | 13 | 1 | 1 | 1 | 5.772  | n/a   | 6.426  | 2.069 | n/a   | 2.323 | 3.473 | n/a   | n/a   | n/a   | 1.424 | n/a   | 1.347 | n/a   | 0.0788 |
| 1E+07 | 13 | 1 | 1 | 1 | 7.458  | n/a   | 9.794  | 2.995 | 2.273 | 3.851 | 1.954 | n/a   | n/a   | n/a   | 1.508 | n/a   | 1.55  | n/a   | 0.489  |
| 1E+07 | 13 | 1 | 1 | 1 | 5.896  | n/a   | 8.862  | 2.313 | 2.421 | 3.674 | 2.124 | n/a   | n/a   | n/a   | 1.14  | n/a   | 1.147 | n/a   | 0.2505 |
| 1E+07 | 13 | 1 | 1 | 1 | 7.46   | n/a   | 6.29   | 2.365 | 1.954 | 3.775 | 1.539 | n/a   | n/a   | n/a   | 1.688 | n/a   | 1.703 | n/a   | 0.9469 |
| 1E+07 | 13 | 1 | 1 | 1 | 12.481 | n/a   | 9.714  | 2.185 | 2.556 | 4.232 | 2.594 | n/a   | n/a   | n/a   | 1.527 | n/a   | 1.532 | n/a   | 0.4859 |
| 1E+07 | 13 | 1 | 1 | 1 | 7.428  | n/a   | 12.3   | 1.941 | 2.706 | 5.171 | 3.773 | n/a   | n/a   | n/a   | 1.807 | n/a   | 1.454 | n/a   | 0.5406 |
| 1E+07 | 13 | 1 | 1 | 1 | 15.249 | n/a   | 10.984 | 3.105 | 3.747 | 6.265 | 3.358 | n/a   | n/a   | n/a   | 4.174 | n/a   | 2.396 | n/a   | 0.8221 |
| 1E+07 | 13 | 1 | 1 | 1 | 8.272  | n/a   | 11.573 | 2.848 | 3.103 | 4.177 | 2.579 | n/a   | n/a   | n/a   | 2.369 | n/a   | 2.256 | n/a   | 0.7559 |
| 1E+07 | 13 | 1 | 1 | 1 | 10.939 | n/a   | 11.06  | 2.706 | 2.546 | 4.599 | 1.687 | n/a   | n/a   | n/a   | 2.341 | n/a   | 2.089 | n/a   | 0.722  |
| 1E+07 | 13 | 1 | 1 | 1 | 9.241  | n/a   | 11.133 | 2.441 | 2.468 | 4.705 | 2.072 | n/a   | n/a   | n/a   | 1.884 | n/a   | 1.919 | n/a   | 0.6424 |
| 1E+07 | 13 | 1 | 1 | 1 | 8.858  | n/a   | 9.778  | 1.339 | 2.679 | 3.859 | 1.668 | n/a   | n/a   | n/a   | 1.183 | n/a   | 0.982 | n/a   | 0.3079 |
| 1E+07 | 13 | 2 | 2 | 2 | 13.849 | 8.724 | 10.264 | 2.556 | 2.53  | 4.982 | 2.566 | 2.814 | 4.568 | 2.135 | 1.558 | 3.389 | 1.58  | 2.62  | 0.8341 |
| 1E+07 | 13 | 1 | 1 | 1 | 13.084 | n/a   | 9.914  | 2.645 | 2.598 | 5.127 | 2.953 | n/a   | n/a   | n/a   | 1.623 | n/a   | 1.612 | n/a   | 0.5373 |
| 1E+07 | 13 | 1 | 1 | 1 | 9.197  | n/a   | 10.593 | 2.763 | 2.869 | 4.841 | 2.004 | n/a   | n/a   | n/a   | 2.963 | n/a   | 2.696 | n/a   | 0.8181 |
| 1E+07 | 13 | 1 | 1 | 1 | 8.602  | n/a   | 9.207  | 2.313 | 2.192 | 3.49  | 2.057 | n/a   | n/a   | n/a   | 1.579 | n/a   | 1.221 | n/a   | 0.3191 |
| 1E+07 | 13 | 1 | 1 | 1 | 2.174  | n/a   | 8.521  | 2.706 | 2.196 | 4.364 | 1.907 | n/a   | n/a   | n/a   | 1.897 | n/a   | 1.557 | n/a   | 0.5838 |
| 1E+07 | 13 | 1 | 1 | 1 | 8.697  | n/a   | 12.424 | 2.769 | 2.617 | 4.453 | 2.365 | n/a   | n/a   | n/a   | 2.212 | n/a   | 1.97  | n/a   | 0.7072 |
| 1E+07 | 13 | 1 | 1 | 0 | n/a    | n/a   | 12.438 | 2.869 | 2.697 | 3.859 | 1.85  | n/a   | n/a   | n/a   | 2.402 | n/a   | 2.057 | n/a   | 0.737  |
| 1E+07 | 13 | 1 | 2 | 2 | 6.923  | 2.559 | 7.511  | 3.049 | 3.23  | 6.009 | 1.264 | n/a   | 3.215 | 2.359 | 3.486 | n/a   | 1.066 | 1.335 | 0.8957 |
| 1E+07 | 13 | 1 | 1 | 1 | 11.999 | n/a   | 7.775  | 2.903 | 2.135 | 3.49  | 1.502 | n/a   | n/a   | n/a   | 1.569 | n/a   | 1.47  | n/a   | 0.1901 |
| 1E+07 | 13 | 1 | 1 | 1 | 12.881 | n/a   | 5.405  | 1.561 | 2.192 | 2.869 | 1.147 | n/a   | n/a   | n/a   | 0.978 | n/a   | 0.965 | n/a   | 0.0023 |
| 1E+07 | 13 | 1 | 1 | 1 | 7.53   | n/a   | 9.032  | 2.309 | 2.24  | 3.674 | 1.623 | n/a   | n/a   | n/a   | 1.316 | n/a   | 1.022 | n/a   | 0.2612 |
| 1E+07 | 13 | 1 | 2 | 2 | 9.132  | 1.549 | 9.272  | 3.335 | 2.953 | 4.67  | 2.556 | n/a   | 3.827 | 1.382 | 3.039 | n/a   | 1.315 | 1.237 | 0.8543 |
| 1E+07 | 13 | 1 | 1 | 1 | 11.071 | n/a   | 7.088  | 2.185 | 2.295 | 3.859 | 1.796 | n/a   | n/a   | n/a   | 1.373 | n/a   | 1.298 | n/a   | 0.1321 |

|       |    |   |   |   |        |       |        |       |       |       |       |       |       |       |       |       |       |       |        |
|-------|----|---|---|---|--------|-------|--------|-------|-------|-------|-------|-------|-------|-------|-------|-------|-------|-------|--------|
| 1E+07 | 13 | 1 | 1 | 1 | 14.716 | n/a   | 10.741 | 2.642 | 2.397 | 4.137 | 1.868 | n/a   | n/a   | n/a   | 1.158 | n/a   | 1.202 | n/a   | 0.409  |
| 1E+07 | 13 | 1 | 2 | 2 | 6.735  | 3.596 | 6.046  | 4.057 | 1.962 | 3.669 | 1.388 | n/a   | 3.019 | 1.566 | 1.544 | n/a   | 1.57  | 1.289 | 0.9425 |
| 1E+07 | 13 | 1 | 1 | 0 | n/a    | n/a   | 11.281 | 1.962 | 3.729 | 5.133 | 1.801 | n/a   | n/a   | n/a   | 2.949 | n/a   | 1.832 | n/a   | 0.7828 |
| 1E+07 | 13 | 1 | 1 | 1 | 1.814  | n/a   | 9.309  | 2.491 | 2.67  | 5.236 | 2.359 | n/a   | n/a   | n/a   | 1.011 | n/a   | 0.957 | n/a   | 0.2666 |
| 1E+07 | 13 | 1 | 1 | 1 | 5.45   | n/a   | 6.563  | 2.185 | 2.185 | 2.822 | 0.529 | n/a   | n/a   | n/a   | 1.645 | n/a   | 1.02  | n/a   | 0.0859 |
| 1E+07 | 13 | 1 | 1 | 1 | 4.341  | n/a   | 6.291  | 2.295 | 2.645 | 3.387 | 0.925 | n/a   | n/a   | n/a   | 1.587 | n/a   | 0.93  | n/a   | 0.0693 |
| 1E+07 | 13 | 1 | 1 | 1 | 4.949  | n/a   | 8.519  | 2.24  | 3.103 | 4.512 | 1.958 | n/a   | n/a   | n/a   | 2.735 | n/a   | 2.339 | n/a   | 0.8915 |
| 1E+07 | 13 | 2 | 2 | 2 | 10.999 | 4.012 | 6.27   | 4.475 | 2.192 | 2.951 | 1.034 | 1.782 | 3.006 | 1.183 | 2.426 | 1.52  | 1.147 | 1.38  | 0.9083 |
| 1E+07 | 13 | 1 | 1 | 1 | 9.181  | n/a   | 11.58  | 2.745 | 2.341 | 3.859 | 1.823 | n/a   | n/a   | n/a   | 3.058 | n/a   | 2.47  | n/a   | 0.7945 |
| 1E+07 | 13 | 1 | 1 | 2 | 8.625  | 3.925 | 8.363  | 3.96  | 2.67  | 5.209 | 2.53  | n/a   | n/a   | n/a   | 2.425 | n/a   | 1.975 | n/a   | 0.9253 |
| 1E+07 | 13 | 1 | 1 | 1 | 20.962 | n/a   | 10.866 | 2.192 | 2.775 | 5.03  | 2.181 | n/a   | n/a   | n/a   | 1.775 | n/a   | 1.963 | n/a   | 0.618  |
| 1E+07 | 13 | 1 | 1 | 1 | 8.557  | n/a   | 9.641  | 3.1   | 3.502 | 5.766 | 2.192 | n/a   | n/a   | n/a   | 3.256 | n/a   | 1.998 | n/a   | 0.8462 |
| 1E+07 | 14 | 1 | 1 | 1 | 16.161 | n/a   | 8.71   | 3.049 | 2.825 | 4.618 | 2.196 | n/a   | n/a   | n/a   | 2.968 | n/a   | 2.408 | n/a   | 0.8748 |
| 1E+07 | 14 | 1 | 1 | 1 | 9.42   | n/a   | 11.102 | 2.295 | 4.836 | 2.341 | n/a   | n/a   | n/a   | n/a   | 2.137 | n/a   | 2.008 | n/a   | 0.6926 |
| 1E+07 | 14 | 1 | 1 | 1 | 10.05  | n/a   | 11.632 | 3.082 | 2.697 | 5.443 | 2.679 | n/a   | n/a   | n/a   | 2.826 | n/a   | 2.589 | n/a   | 0.7984 |
| 1E+07 | 14 | 1 | 1 | 1 | 11.938 | n/a   | 12.87  | 2.869 | 3.105 | 4.79  | 2.309 | n/a   | n/a   | n/a   | 1.82  | n/a   | 2.788 | n/a   | 0.7521 |
| 1E+07 | 14 | 1 | 1 | 1 | 6.207  | n/a   | 6.042  | 2.491 | 2.569 | 3.628 | 1.183 | n/a   | n/a   | n/a   | 1.624 | n/a   | 1.144 | n/a   | 0.0505 |
| 1E+07 | 14 | 1 | 1 | 2 | 8.329  | 2.721 | 8.055  | 4.202 | 3.574 | 5.289 | 2.069 | n/a   | n/a   | n/a   | 3.525 | n/a   | 2.789 | n/a   | 0.879  |
| 1E+07 | 14 | 1 | 2 | 2 | 8.597  | 4.432 | 6.127  | 4.22  | 2.313 | 4.369 | 1.954 | n/a   | 4.026 | 1.463 | 4.106 | n/a   | 1.457 | 1.632 | 0.8873 |
| 1E+07 | 14 | 1 | 1 | 1 | 9.362  | n/a   | 10.495 | 1.745 | 2.706 | 4.774 | 2.15  | n/a   | n/a   | n/a   | 3.035 | n/a   | 2.441 | n/a   | 0.8141 |
| 1E+07 | 14 | 1 | 1 | 1 | 7.56   | n/a   | 7.631  | 2.196 | 2.397 | 4.748 | 2.434 | n/a   | n/a   | n/a   | 1.487 | n/a   | 1.197 | n/a   | 0.1646 |
| 1E+07 | 14 | 1 | 1 | 1 | 9.313  | n/a   | 10.319 | 2.579 | 2.769 | 4.131 | 2.27  | n/a   | n/a   | n/a   | 1.558 | n/a   | 1.796 | n/a   | 0.5537 |
| 1E+07 | 14 | 1 | 1 | 1 | 6.552  | n/a   | 7.954  | 3.079 | 1.907 | 3.631 | 1.283 | n/a   | n/a   | n/a   | 1.269 | n/a   | 1.813 | n/a   | 0.2186 |
| 1E+07 | 14 | 1 | 1 | 1 | 11.621 | n/a   | 10.838 | 2.903 | 2.883 | 4.539 | 1.868 | n/a   | n/a   | n/a   | 3.269 | n/a   | 2.427 | n/a   | 0.8062 |
| 1E+07 | 14 | 1 | 1 | 1 | 14.622 | n/a   | 7.982  | 2.883 | 2.313 | 3.567 | 1.85  | n/a   | n/a   | n/a   | 1.354 | n/a   | 1.425 | n/a   | 0.2004 |
| 1E+07 | 14 | 1 | 1 | 1 | 13.899 | n/a   | 7.966  | 2.491 | 2.527 | 3.215 | 0.898 | n/a   | n/a   | n/a   | 1.134 | n/a   | 1.648 | n/a   | 0.1952 |
| 1E+07 | 14 | 1 | 1 | 1 | 8.885  | n/a   | 8.664  | 2.124 | 2.598 | 4.584 | 1.837 | n/a   | n/a   | n/a   | 1.2   | n/a   | 1.741 | n/a   | 0.2585 |
| 1E+07 | 14 | 1 | 1 | 1 | 12.83  | n/a   | 10.511 | 2.931 | 2.365 | 4.626 | 1.907 | n/a   | n/a   | n/a   | 3.87  | n/a   | 2.523 | n/a   | 0.8261 |
| 1E+07 | 14 | 1 | 1 | 1 | 8.253  | n/a   | 12.516 | 2.421 | 2.181 | 4.556 | 2.763 | n/a   | n/a   | n/a   | 2.287 | n/a   | 1.901 | n/a   | 0.7146 |
| 1E+07 | 14 | 1 | 1 | 1 | 7.906  | n/a   | 11.397 | 2.721 | 2.903 | 5.414 | 2.53  | n/a   | n/a   | n/a   | 2.29  | n/a   | 1.917 | n/a   | 0.6962 |
| 1E+07 | 14 | 1 | 1 | 1 | 7.066  | n/a   | 6.17   | 2.834 | 2.569 | 3.49  | 1.27  | n/a   | n/a   | n/a   | 1.488 | n/a   | 1.269 | n/a   | 0.0645 |
| 1E+07 | 14 | 1 | 1 | 1 | 7.858  | n/a   | 10.67  | 2.491 | 1.587 | 3.827 | 2.053 | n/a   | n/a   | n/a   | 1.608 | n/a   | 1.568 | n/a   | 0.534  |
| 1E+07 | 14 | 1 | 1 | 1 | 13.249 | n/a   | 11.06  | 1.668 | 2.057 | 4.107 | 1.668 | n/a   | n/a   | n/a   | 1.391 | n/a   | 1.693 | n/a   | 0.5178 |
| 1E+07 | 14 | 1 | 1 | 1 | 5.281  | n/a   | 11.093 | 2.313 | 2.323 | 5.041 | 3.207 | n/a   | n/a   | n/a   | 1.325 | n/a   | 1.811 | n/a   | 0.521  |
| 1E+07 | 14 | 1 | 1 | 1 | 6.453  | n/a   | 5.289  | 2.295 | 2.057 | 2.697 | 1.264 | n/a   | n/a   | n/a   | 1.434 | n/a   | 1.281 | n/a   | 0.0068 |
| 1E+07 | 14 | 1 | 1 | 2 | 10.783 | 3.19  | 9.018  | 2.434 | 2.67  | 4.249 | 1.364 | n/a   | n/a   | n/a   | 3.301 | n/a   | 2.278 | n/a   | 0.8666 |
| 1E+07 | 14 | 1 | 1 | 1 | 10.432 | n/a   | 11.538 | 2.273 | 2.323 | 4.647 | 2.951 | n/a   | n/a   | n/a   | 1.321 | n/a   | 1.112 | n/a   | 0.4485 |
| 1E+07 | 15 | 1 | 1 | 1 | 9.08   | n/a   | 5.886  | 2.434 | 2.848 | 2.825 | 0.654 | n/a   | n/a   | n/a   | 3.138 | n/a   | 0.846 | n/a   | 0.9688 |
| 1E+07 | 15 | 1 | 1 | 1 | 11.084 | n/a   | 6.487  | 1.924 | 2.15  | 2.721 | 1.155 | n/a   | n/a   | n/a   | 1.407 | n/a   | 1.379 | n/a   | 0.0835 |
| 1E+07 | 15 | 1 | 1 | 1 | 5.127  | n/a   | 6.734  | 2.743 | 2.355 | 3.103 | 1.587 | n/a   | n/a   | n/a   | 2.511 | n/a   | 1.435 | n/a   | 0.9644 |
| 1E+07 | 15 | 1 | 1 | 1 | 13.168 | n/a   | 9.662  | 2.84  | 2.52  | 4.22  | 2.116 | n/a   | n/a   | n/a   | 3.444 | n/a   | 2.926 | n/a   | 0.8421 |
| 1E+07 | 15 | 1 | 2 | 2 | 8.156  | 2.397 | 7.402  | 4.59  | 2.642 | 4.27  | 2.028 | n/a   | 4.051 | 1.712 | 3.247 | n/a   | 1.232 | 1.712 | 0.8831 |
| 1E+07 | 15 | 1 | 1 | 1 | 6.455  | n/a   | 5.681  | 2.207 | 2.566 | 2.931 | 1.183 | n/a   | n/a   | n/a   | 1.496 | n/a   | 1.639 | n/a   | 0.0365 |
| 1E+07 | 15 | 1 | 1 | 1 | 5.243  | n/a   | 9.219  | 2.491 | 2.931 | 5.195 | 3.145 | n/a   | n/a   | n/a   | 3.351 | n/a   | 2.119 | n/a   | 0.8584 |
| 1E+07 | 15 | 1 | 1 | 1 | 5.808  | n/a   | 6.148  | 2.355 | 2.962 | 3.7   | 1.463 | n/a   | n/a   | n/a   | 1.791 | n/a   | 1.613 | n/a   | 0.96   |
| 1E+07 | 15 | 1 | 1 | 1 | 6.584  | n/a   | 9.101  | 2.598 | 1.996 | 3.452 | 1.283 | n/a   | n/a   | n/a   | 1.562 | n/a   | 1.527 | n/a   | 0.3418 |
| 1E+07 | 15 | 1 | 1 | 1 | 11.297 | n/a   | 6.443  | 2.421 | 1.868 | 3.409 | 1.382 | n/a   | n/a   | n/a   | 2.44  | n/a   | 1.499 | n/a   | 0.9556 |
| 1E+07 | 15 | 1 | 1 | 1 | 3.31   | n/a   | 4.902  | 2.451 | 2.569 | 2.962 | 1.587 | n/a   | n/a   | n/a   | 1.166 | n/a   | 1.464 | n/a   | 0.0113 |
| 1E+07 | 15 | 1 | 1 | 1 | 8.584  | n/a   | 6.829  | 2.441 | 1.837 | 3.464 | 1.929 | n/a   | n/a   | n/a   | 1.831 | n/a   | 1.957 | n/a   | 0.9512 |
| 1E+07 | 15 | 1 | 1 | 1 | 9.32   | n/a   | 12.092 | 2.468 | 2.617 | 4.27  | 1.924 | n/a   | n/a   | n/a   | 2.466 | n/a   | 2.334 | n/a   | 0.7712 |
| 1E+07 | 15 | 1 | 1 | 1 | 5.041  | n/a   | 5.26   | 2.718 | 2.727 | 3.215 | 0.925 | n/a   | n/a   | n/a   | 1.079 | n/a   | 0.935 | n/a   | 0.009  |
| 1E+07 | 15 | 1 | 1 | 1 | 4.99   | n/a   | 6.634  | 2.088 | 2.451 | 3.1   | 1.026 | n/a   | n/a   | n/a   | 1.826 | n/a   | 1.318 | n/a   | 0.11   |
| 1E+07 | 15 | 1 | 1 | 1 | 12.003 | n/a   | 8.988  | 2.822 | 2.323 | 3.485 | 1.924 | n/a   | n/a   | n/a   | 2.774 | n/a   | 3.445 | n/a   | 0.8503 |
| 1E+07 | 15 | 2 | 2 | 2 | 9.777  | 4.369 | 5.835  | 3.7   | 3.003 | 3.674 | 1.587 | 2.642 | 3.851 | 1.55  | 1.694 | 1.114 | 1.243 | 1.55  | 0.9125 |
| 1E+07 | 15 | 1 | 1 | 1 | 10.239 | n/a   | 13.12  | 2.295 | 2.527 | 4.424 | 2.088 | n/a   | n/a   | n/a   | 2.274 | n/a   | 2.156 | n/a   | 0.7332 |
| 1E+07 | 15 | 1 | 1 | 1 | 10.648 | n/a   | 11.87  | 2.706 | 2.569 | 5.385 | 2.925 | n/a   | n/a   | n/a   | 2.095 | n/a   | 1.865 | n/a   | 0.6709 |
| 1E+07 | 15 | 1 | 1 | 1 | 12.994 | n/a   | 10.545 | 2.566 | 2.598 | 4.27  | 2.617 | n/a   | n/a   | n/a   | 2.357 | n/a   | 2.859 | n/a   | 0.8023 |
| 1E+07 | 15 | 1 | 1 | 1 | 9.838  | n/a   | 8.262  | 1.958 | 1.85  | 4.057 | 1.726 | n/a   | n/a   | n/a   | 1.499 | n/a   | 1.563 | n/a   | 0.2371 |
| 1E+07 | 16 | 1 | 1 | 1 | 5.395  | n/a   | 10.016 | 2.069 | 2.826 | 3.736 | 1.283 | n/a   | n/a   | n/a   | 0.863 | n/a   | 0.952 | n/a   | 0.2996 |
| 1E+07 | 16 | 1 | 1 | 1 | 6.117  | n/a   | 9.334  | 2.177 | 2.464 | 4.902 | 2.313 | n/a   | n/a   | n/a   | 0.789 | n/a   | 1.114 | n/a   | 0.2639 |
| 1E+07 | 16 | 1 | 1 | 1 | 13.782 | n/a   | 11.658 | 1.787 | 2.617 | 3.983 | 1.434 | n/a   | n/a   | n/a   | 0.833 | n/a   | 1.131 | n/a   | 0.415  |
| 1E+07 | 16 | 1 | 1 | 1 | 7.923  | n/a   | 9.71   | 2.029 | 2.15  | 3.808 | 1.907 | n/a   | n/a   | n/a   | 0.673 | n/a   | 0.848 | n/a   | 0.2858 |
| 1E+07 | 16 | 1 | 1 | 1 | 6.502  | n/a   | 7.167  | 1.991 | 1.745 | 3.74  | 2.341 | n/a   | n/a   | n/a   | 0.678 | n/a   | 1.032 | n/a   | 0.1052 |
| 1E+07 | 16 | 1 | 1 | 1 | 8.202  | n/a   | 8.467  | 2.323 | 2.441 | 3.594 | 1.434 | n/a   | n/a   | n/a   | 1.532 | n/a   | 2.006 | n/a   | 0.6008 |
| 1E+07 | 16 | 1 | 1 | 1 | 4.804  | n/a   | 4.618  | 2.822 | 2.309 | 3.423 | 1.21  | n/a   | n/a   | n/a   | 1.339 | n/a   | 1.02  | n/a   | 0.0181 |

|       |    |   |   |   |        |       |        |       |       |       |       |       |       |       |       |       |       |       |        |
|-------|----|---|---|---|--------|-------|--------|-------|-------|-------|-------|-------|-------|-------|-------|-------|-------|-------|--------|
| 1E+07 | 17 | 2 | 2 | 2 | 7.735  | 2.578 | 6.116  | 4.107 | 2.722 | 3.882 | 1.162 | 2.556 | 3.278 | 1.058 | 0.654 | 0.809 | 0.829 | 1.068 | 0.074  |
| 1E+07 | 17 | 2 | 2 | 2 | 7.974  | 3.222 | 6.179  | 4.208 | 3.346 | 4.057 | 0.861 | 2.883 | 3.814 | 1.034 | 1.006 | 1.153 | 1.132 | 1.155 | 0.991  |
| 1E+07 | 17 | 2 | 2 | 2 | 15.202 | 5.977 | 6.055  | 4.665 | 2.582 | 2.645 | 1.182 | 3.522 | 3.548 | 0.898 | 0.627 | 0.494 | 0.897 | 1.048 | 0.0669 |
| 1E+07 | 17 | 1 | 1 | 1 | 15.462 | n/a   | 10.424 | 2.355 | 2.742 | 5.51  | 2.802 | n/a   | n/a   | n/a   | 1.094 | n/a   | 1.092 | n/a   | 0.3677 |
| 1E+07 | 17 | 1 | 1 | 1 | 7.599  | n/a   | 9.606  | 2.434 | 2.478 | 3.328 | 2.088 | n/a   | n/a   | n/a   | 0.654 | n/a   | 0.918 | n/a   | 0.2775 |
| 1E+07 | 17 | 1 | 1 | 1 | 10.612 | n/a   | 8.967  | 2.451 | 2.053 | 4.908 | 2.15  | n/a   | n/a   | n/a   | 0.476 | n/a   | 0.793 | n/a   | 0.1926 |
| 1E+07 | 17 | 1 | 1 | 1 | 6.851  | n/a   | 8.789  | 2.566 | 2.464 | 3.827 | 1.364 | n/a   | n/a   | n/a   | 0.477 | n/a   | 0.904 | n/a   | 0.1824 |
| 1E+07 | 17 | 1 | 1 | 1 | 15.321 | n/a   | 11.591 | 2.421 | 1.907 | 4.59  | 2.742 | n/a   | n/a   | n/a   | 0.998 | n/a   | 1.23  | n/a   | 0.4362 |
| 1E+07 | 17 | 1 | 1 | 1 | 9.136  | n/a   | 11.738 | 2.556 | 2.706 | 5.413 | 2.569 | n/a   | n/a   | n/a   | 0.957 | n/a   | 1.247 | n/a   | 0.4423 |
| 1E+07 | 17 | 1 | 1 | 1 | 17.665 | n/a   | 11.771 | 2.706 | 2.468 | 4.137 | 1.539 | n/a   | n/a   | n/a   | 0.633 | n/a   | 1.068 | n/a   | 0.3882 |
| 1E+07 | 17 | 1 | 1 | 1 | 12.447 | n/a   | 12.27  | 2.826 | 2.366 | 4.626 | 2.123 | n/a   | n/a   | n/a   | 1.519 | n/a   | 1.632 | n/a   | 0.5275 |
| 1E+07 | 17 | 1 | 1 | 1 | 13.335 | n/a   | 11.774 | 2.77  | 2.069 | 4.178 | 2.135 | n/a   | n/a   | n/a   | 0.944 | n/a   | 1.465 | n/a   | 0.4608 |
| 1E+07 | 17 | 1 | 1 | 1 | 7.627  | n/a   | 9.545  | 2.313 | 2.196 | 3.858 | 1.787 | n/a   | n/a   | n/a   | 0.696 | n/a   | 1.096 | n/a   | 0.283  |
| 1E+07 | 17 | 1 | 1 | 1 | 11.005 | n/a   | 10.367 | 2.598 | 2.478 | 5.107 | 2.421 | n/a   | n/a   | n/a   | 0.921 | n/a   | 1.156 | n/a   | 0.359  |
| 1E+07 | 17 | 1 | 1 | 1 | 8.103  | n/a   | 10.43  | 2.746 | 2.645 | 4.247 | 1.726 | n/a   | n/a   | n/a   | 0.847 | n/a   | 1.317 | n/a   | 0.3648 |
| 1E+07 | 17 | 1 | 1 | 1 | 9.146  | n/a   | 10.644 | 2.814 | 2.645 | 4.016 | 1.411 | n/a   | n/a   | n/a   | 0.712 | n/a   | 1.33  | n/a   | 0.3706 |
| 1E+07 | 17 | 1 | 1 | 1 | 9.684  | n/a   | 8.109  | 2.181 | 2.464 | 4.093 | 1.837 | n/a   | n/a   | n/a   | 0.925 | n/a   | 1.167 | n/a   | 0.1722 |
| 1E+07 | 17 | 1 | 1 | 1 | 7.468  | n/a   | 9.658  | 2.742 | 2.451 | 3.328 | 1.434 | n/a   | n/a   | n/a   | 1.038 | n/a   | 1.267 | n/a   | 0.3135 |
| 1E+07 | 17 | 1 | 1 | 1 | 15.002 | n/a   | 6.67   | 2.029 | 2.069 | 3.335 | 1.417 | n/a   | n/a   | n/a   | 0.938 | n/a   | 0.995 | n/a   | 0.0716 |
| 1E+07 | 17 | 1 | 1 | 1 | 6.789  | n/a   | 7.674  | 2.421 | 2.366 | 4.008 | 1.837 | n/a   | n/a   | n/a   | 0.9   | n/a   | 1.147 | n/a   | 0.1495 |
| 1E+07 | 17 | 1 | 1 | 1 | 5.838  | n/a   | 6.374  | 2.029 | 2.069 | 3.106 | 1.034 | n/a   | n/a   | n/a   | 0.988 | n/a   | 1.044 | n/a   | 0.0551 |
| 1E+07 | 17 | 1 | 1 | 1 | 7.115  | n/a   | 8.917  | 2.894 | 2.241 | 4.163 | 1.823 | n/a   | n/a   | n/a   | 0.618 | n/a   | 0.955 | n/a   | 0.2134 |
| 1E+07 | 17 | 1 | 1 | 1 | 15.093 | n/a   | 7.447  | 2.521 | 2.057 | 5.198 | 3.003 | n/a   | n/a   | n/a   | 0.793 | n/a   | 0.996 | n/a   | 0.1223 |
| 1E+07 | 17 | 1 | 1 | 1 | 9.656  | n/a   | 6.829  | 2.53  | 1.924 | 2.992 | 0.811 | n/a   | n/a   | n/a   | 0.829 | n/a   | 1.151 | n/a   | 0.0883 |
| 1E+07 | 17 | 1 | 1 | 1 | 15.983 | n/a   | 7.175  | 2.903 | 2.358 | 4.341 | 1.868 | n/a   | n/a   | n/a   | 1.217 | n/a   | 1.204 | n/a   | 0.1272 |
| 1E+07 | 17 | 1 | 1 | 1 | 12.63  | n/a   | 6.394  | 2.67  | 2.556 | 4.057 | 1.607 | n/a   | n/a   | n/a   | 0.858 | n/a   | 1.033 | n/a   | 0.0528 |
| 1E+07 | 17 | 1 | 1 | 1 | 7.474  | n/a   | 8.291  | 3.485 | 2.397 | 3.09  | 1.417 | n/a   | n/a   | n/a   | 1.037 | n/a   | 1.324 | n/a   | 0.203  |
| 1E+07 | 17 | 1 | 1 | 1 | 7.378  | n/a   | 5.97   | 2.869 | 1.796 | 2.722 | 0.907 | n/a   | n/a   | n/a   | 0.993 | n/a   | 0.982 | n/a   | 0.025  |
| 1E+07 | 17 | 1 | 1 | 1 | 2.802  | n/a   | 6.333  | 3.218 | 2.742 | 4.137 | 1.545 | n/a   | n/a   | n/a   | 0.382 | n/a   | 0.832 | n/a   | 0.0296 |
| 1E+07 | 17 | 1 | 1 | 1 | 10.606 | n/a   | 7.322  | 2.976 | 2.578 | 4.746 | 2.566 | n/a   | n/a   | n/a   | 0.823 | n/a   | 1.19  | n/a   | 0.1198 |
| 1E+07 | 17 | 1 | 1 | 1 | 9.275  | n/a   | 12.318 | 2.053 | 3.084 | 4.773 | 1.787 | n/a   | n/a   | n/a   | 1.939 | n/a   | 1.647 | n/a   | 0.5771 |
| 1E+07 | 17 | 1 | 1 | 1 | 9.436  | n/a   | 11.235 | 2.116 | 2.817 | 4.65  | 1.787 | n/a   | n/a   | n/a   | 1.853 | n/a   | 2.075 | n/a   | 0.6601 |
| 1E+07 | 17 | 1 | 1 | 1 | 12.902 | n/a   | 11.286 | 3.367 | 2.358 | 4.868 | 2.84  | n/a   | n/a   | n/a   | 1.295 | n/a   | 1.464 | n/a   | 0.4796 |
| 1E+07 | 17 | 1 | 1 | 1 | 15.174 | n/a   | 12.19  | 1.924 | 3.028 | 5.236 | 2.358 | n/a   | n/a   | n/a   | 1.925 | n/a   | 2.064 | n/a   | 0.6817 |
| 1E+07 | 17 | 1 | 1 | 1 | 13.733 | n/a   | 11.324 | 2.355 | 2.722 | 5.75  | 2.954 | n/a   | n/a   | n/a   | 2.081 | n/a   | 2.129 | n/a   | 0.6999 |
| 1E+07 | 17 | 1 | 1 | 1 | 11.927 | n/a   | 11.923 | 2.697 | 2.438 | 3.995 | 1.561 | n/a   | n/a   | n/a   | 1.704 | n/a   | 1.913 | n/a   | 0.5906 |
| 1E+07 | 17 | 1 | 1 | 1 | 15.205 | n/a   | 10.602 | 2.41  | 2.718 | 4.099 | 1.502 | n/a   | n/a   | n/a   | 2.133 | n/a   | 1.955 | n/a   | 0.6745 |
| 1E+07 | 17 | 1 | 1 | 1 | 8.104  | n/a   | 12.604 | 2.928 | 3.028 | 4.698 | 1.673 | n/a   | n/a   | n/a   | 1.541 | n/a   | 1.933 | n/a   | 0.5637 |
| 1E+07 | 17 | 1 | 1 | 1 | 10.757 | n/a   | 12.329 | 2.894 | 3.084 | 4.731 | 1.801 | n/a   | n/a   | n/a   | 1.237 | n/a   | 1.77  | n/a   | 0.5017 |
| 1E+07 | 17 | 1 | 1 | 1 | 12.18  | n/a   | 13.01  | 3.106 | 2.617 | 4.424 | 1.782 | n/a   | n/a   | n/a   | 2.213 | n/a   | 2.36  | n/a   | 0.7483 |
| 1E+07 | 17 | 1 | 1 | 1 | 12.175 | n/a   | 10.174 | 2.434 | 2.645 | 4.71  | 1.924 | n/a   | n/a   | n/a   | 2.421 | n/a   | 1.943 | n/a   | 0.7183 |
| 1E+07 | 17 | 1 | 1 | 1 | 14.542 | n/a   | 11.302 | 3.042 | 3.122 | 5.316 | 2.185 | n/a   | n/a   | n/a   | 1.777 | n/a   | 1.996 | n/a   | 0.6284 |
| 1E+07 | 18 | 1 | 1 | 1 | 7.462  | n/a   | 7.876  | 2.069 | 2.645 | 4.378 | 1.801 | n/a   | n/a   | n/a   | 1.296 | n/a   | 1.228 | n/a   | 0.1747 |
| 1E+07 | 18 | 1 | 1 | 1 | 7.076  | n/a   | 10.161 | 2.869 | 2.123 | 3.952 | 1.907 | n/a   | n/a   | n/a   | 0.792 | n/a   | 1.186 | n/a   | 0.3361 |
| 1E+07 | 18 | 1 | 1 | 1 | 6.133  | n/a   | 8.191  | 2.313 | 2.029 | 3.882 | 2.053 | n/a   | n/a   | n/a   | 0.766 | n/a   | 1.001 | n/a   | 0.1621 |
| 1E+07 | 18 | 1 | 1 | 1 | 12.05  | n/a   | 10.34  | 3.019 | 2.697 | 4.265 | 1.622 | n/a   | n/a   | n/a   | 1.054 | n/a   | 1.38  | n/a   | 0.3853 |
| 1E+07 | 18 | 1 | 1 | 1 | 11.323 | n/a   | 12.102 | 2.181 | 2.582 | 4.163 | 1.726 | n/a   | n/a   | n/a   | 0.819 | n/a   | 1.086 | n/a   | 0.4211 |
| 1E+07 | 18 | 1 | 1 | 1 | 6.698  | n/a   | 12.385 | 2.341 | 2.775 | 4.997 | 2.527 | n/a   | n/a   | n/a   | 1.461 | n/a   | 1.605 | n/a   | 0.5114 |
| 1E+07 | 18 | 1 | 1 | 1 | 11.478 | n/a   | 10.655 | 2.069 | 2.521 | 4.392 | 1.929 | n/a   | n/a   | n/a   | 1.196 | n/a   | 1.201 | n/a   | 0.412  |
| 1E+07 | 18 | 1 | 1 | 1 | 8.555  | n/a   | 10.958 | 2.274 | 2.355 | 5.195 | 2.849 | n/a   | n/a   | n/a   | 1.756 | n/a   | 1.911 | n/a   | 0.6111 |
| 1E+07 | 18 | 1 | 1 | 1 | 7.249  | n/a   | 10.338 | 2.355 | 2.057 | 3.979 | 2.088 | n/a   | n/a   | n/a   | 0.748 | n/a   | 0.976 | n/a   | 0.3247 |
| 1E+07 | 18 | 1 | 1 | 1 | 8.304  | n/a   | 11.52  | 2.817 | 2.284 | 4.008 | 1.924 | n/a   | n/a   | n/a   | 0.601 | n/a   | 0.946 | n/a   | 0.3823 |
| 1E+07 | 18 | 1 | 1 | 1 | 11.722 | n/a   | 10.345 | 2.578 | 2.323 | 4.89  | 2.706 | n/a   | n/a   | n/a   | 0.9   | n/a   | 1.152 | n/a   | 0.3561 |
| 1E+07 | 18 | 1 | 1 | 1 | 11.418 | n/a   | 12.112 | 3.132 | 2.598 | 4.265 | 1.929 | n/a   | n/a   | n/a   | 1.313 | n/a   | 1.173 | n/a   | 0.4577 |
| 1E+07 | 18 | 1 | 1 | 1 | 9.406  | n/a   | 10.994 | 2.869 | 2.366 | 4.79  | 2.295 | n/a   | n/a   | n/a   | 1.041 | n/a   | 1.171 | n/a   | 0.4031 |
| 1E+07 | 18 | 1 | 1 | 1 | 4.81   | n/a   | 8.433  | 2.284 | 2.207 | 3.808 | 1.673 | n/a   | n/a   | n/a   | 0.528 | n/a   | 0.982 | n/a   | 0.1671 |
| 1E+07 | 18 | 1 | 1 | 1 | 6.822  | n/a   | 10.132 | 2.926 | 2.556 | 3.747 | 1.721 | n/a   | n/a   | n/a   | 0.854 | n/a   | 1.123 | n/a   | 0.3304 |
| 1E+07 | 18 | 1 | 1 | 1 | 6.897  | n/a   | 7.676  | 2.697 | 1.924 | 2.84  | 1.034 | n/a   | n/a   | n/a   | 1.011 | n/a   | 1.204 | n/a   | 0.1595 |
| 1E+07 | 18 | 1 | 1 | 1 | 6.553  | n/a   | 6.168  | 2.569 | 2.313 | 3.33  | 1.058 | n/a   | n/a   | n/a   | 1.063 | n/a   | 1.101 | n/a   | 0.0412 |
| 1E+07 | 18 | 1 | 1 | 1 | 6.774  | n/a   | 6.446  | 2.976 | 2.185 | 3.288 | 1.496 | n/a   | n/a   | n/a   | 0.946 | n/a   | 0.991 | n/a   | 0.0622 |
| 1E+07 | 18 | 1 | 1 | 1 | 6.581  | n/a   | 5.697  | 2.742 | 2.849 | 4.099 | 1.496 | n/a   | n/a   | n/a   | 0.877 | n/a   | 1.135 | n/a   | 0.0204 |
| 1E+07 | 18 | 1 | 1 | 1 | 7.566  | n/a   | 8.258  | 2.004 | 2.984 | 3.85  | 1.248 | n/a   | n/a   | n/a   | 1.836 | n/a   | 1.537 | n/a   | 0.5704 |
| 1E+07 | 18 | 1 | 1 | 1 | 8.261  | n/a   | 11.339 | 2.826 | 2.566 | 4.749 | 2.241 | n/a   | n/a   | n/a   | 1.012 | n/a   | 1.657 | n/a   | 0.4733 |
| 1E+07 | 18 | 1 | 1 | 1 | 8.742  | n/a   | 9.184  | 2.632 | 2.566 | 4.902 | 2.491 | n/a   | n/a   | n/a   | 1.698 | n/a   | 2.013 | n/a   | 0.6146 |
| 1E+07 | 18 | 1 | 1 | 1 | 14.59  | n/a   | 10.901 | 1.958 | 2.556 | 4.384 | 1.745 | n/a   | n/a   | n/a   | 2.344 | n/a   | 1.909 | n/a   | 0.7035 |

|       |    |   |   |   |        |       |        |       |       |       |       |      |       |       |       |       |       |       |        |
|-------|----|---|---|---|--------|-------|--------|-------|-------|-------|-------|------|-------|-------|-------|-------|-------|-------|--------|
| 1E+07 | 18 | 1 | 1 | 1 | 9.516  | n/a   | 11.836 | 2.697 | 2.883 | 5.396 | 2.697 | n/a  | n/a   | n/a   | 2.353 | n/a   | 2.403 | n/a   | 0.7673 |
| 1E+07 | 18 | 1 | 1 | 1 | 7.202  | n/a   | 10.232 | 2.464 | 2.754 | 4.733 | 1.907 | n/a  | n/a   | n/a   | 1.976 | n/a   | 1.806 | n/a   | 0.6215 |
| 1E+07 | 18 | 1 | 1 | 1 | 14.413 | n/a   | 11.849 | 2.869 | 2.632 | 5.353 | 2.546 | n/a  | n/a   | n/a   | 1.713 | n/a   | 2.365 | n/a   | 0.6889 |
| 1E+07 | 18 | 1 | 1 | 1 | 18.734 | n/a   | 11.603 | 3.1   | 2.718 | 4.705 | 2.069 | n/a  | n/a   | n/a   | 1.774 | n/a   | 2.263 | n/a   | 0.6853 |
| 1E+07 | 18 | 1 | 1 | 1 | 14.981 | n/a   | 10.843 | 2.954 | 2.976 | 5.107 | 2.274 | n/a  | n/a   | n/a   | 1.809 | n/a   | 1.985 | n/a   | 0.6354 |
| 1E+07 | 18 | 1 | 1 | 1 | 11.914 | n/a   | 10.609 | 3.613 | 2.926 | 5.385 | 2.468 | n/a  | n/a   | n/a   | 1.982 | n/a   | 1.916 | n/a   | 0.6566 |
| 1E+07 | 19 | 1 | 2 | 2 | 15.041 | 3.678 | 7.724  | 3.298 | 2.468 | 3.485 | 0.907 | n/a  | 5.107 | 2.928 | 1.989 | n/a   | 1.259 | 0.945 | 0.9865 |
| 1E+07 | 19 | 2 | 2 | 2 | 10.423 | 4.832 | 5.446  | 5.234 | 2.697 | 3.09  | 1.154 | 3.85 | 3.814 | 0.925 | 0.602 | 0.733 | 1.105 | 0.988 | 0.9821 |
| 1E+07 | 19 | 1 | 1 | 1 | 13.014 | n/a   | 10.826 | 2.185 | 2.241 | 4.362 | 2.241 | n/a  | n/a   | n/a   | 1.023 | n/a   | 1.276 | n/a   | 0.406  |
| 1E+07 | 19 | 1 | 1 | 1 | 14.406 | n/a   | 10.174 | 2.057 | 2.341 | 4.422 | 2.196 | n/a  | n/a   | n/a   | 0.664 | n/a   | 1.204 | n/a   | 0.3219 |
| 1E+07 | 19 | 1 | 1 | 1 | 15.942 | n/a   | 9.206  | 2.53  | 2.244 | 4.99  | 2.775 | n/a  | n/a   | n/a   | 0.785 | n/a   | 0.812 | n/a   | 0.2451 |
| 1E+07 | 19 | 1 | 1 | 1 | 7.832  | n/a   | 6.318  | 1.787 | 2.441 | 4.053 | 1.721 | n/a  | n/a   | n/a   | 0.464 | n/a   | 0.979 | n/a   | 0.0342 |
| 1E+07 | 19 | 1 | 1 | 1 | 8.594  | n/a   | 9.574  | 2.826 | 2.241 | 3.218 | 0.977 | n/a  | n/a   | n/a   | 0.961 | n/a   | 1.338 | n/a   | 0.3051 |
| 1E+07 | 19 | 1 | 1 | 1 | 2.011  | n/a   | 8.892  | 2.727 | 2.366 | 4.091 | 1.726 | n/a  | n/a   | n/a   | 1.054 | n/a   | 1.464 | n/a   | 0.2558 |
| 1E+07 | 19 | 1 | 1 | 1 | 14.419 | n/a   | 8.879  | 2.742 | 1.942 | 3.542 | 1.787 | n/a  | n/a   | n/a   | 0.675 | n/a   | 1.05  | n/a   | 0.2213 |
| 1E+07 | 19 | 1 | 1 | 1 | 12.749 | n/a   | 9.938  | 1.364 | 2.104 | 5.274 | 3.186 | n/a  | n/a   | n/a   | 0.757 | n/a   | 1.05  | n/a   | 0.2968 |
| 1E+07 | 19 | 1 | 1 | 1 | 6.611  | n/a   | 9.976  | 1.451 | 2.421 | 4.288 | 2.004 | n/a  | n/a   | n/a   | 0.62  | n/a   | 1.06  | n/a   | 0.2913 |
| 1E+07 | 19 | 1 | 1 | 1 | 11.947 | n/a   | 13.861 | 2.546 | 2.54  | 4.91  | 2.645 | n/a  | n/a   | n/a   | 1.323 | n/a   | 1.542 | n/a   | 0.4986 |
| 1E+07 | 19 | 1 | 1 | 1 | 2.962  | n/a   | 7.638  | 1.539 | 2.569 | 4.242 | 1.962 | n/a  | n/a   | n/a   | 0.635 | n/a   | 1.277 | n/a   | 0.1445 |
| 1E+07 | 19 | 1 | 1 | 1 | 15.556 | n/a   | 8.442  | 1.907 | 1.907 | 3.33  | 1.434 | n/a  | n/a   | n/a   | 0.598 | n/a   | 1.19  | n/a   | 0.1773 |
| 1E+07 | 19 | 1 | 1 | 1 | 11.03  | n/a   | 9.195  | 2.181 | 2.088 | 4.856 | 2.645 | n/a  | n/a   | n/a   | 1.046 | n/a   | 1.201 | n/a   | 0.2721 |
| 1E+07 | 19 | 1 | 1 | 1 | 5.727  | n/a   | 8.915  | 2.135 | 2.645 | 4.107 | 1.539 | n/a  | n/a   | n/a   | 0.869 | n/a   | 1.234 | n/a   | 0.2424 |
| 1E+07 | 19 | 1 | 1 | 1 | 8.358  | n/a   | 7.558  | 1.837 | 2.123 | 3.288 | 1.217 | n/a  | n/a   | n/a   | 0.95  | n/a   | 1.358 | n/a   | 0.147  |
| 1E+07 | 19 | 1 | 1 | 1 | 11.745 | n/a   | 10.654 | 2.84  | 1.837 | 4.634 | 2.953 | n/a  | n/a   | n/a   | 0.921 | n/a   | 1.144 | n/a   | 0.3736 |
| 1E+07 | 19 | 1 | 1 | 1 | 17.237 | n/a   | 8.882  | 2.451 | 2.434 | 5.278 | 2.817 | n/a  | n/a   | n/a   | 0.763 | n/a   | 1.173 | n/a   | 0.2318 |
| 1E+07 | 19 | 1 | 1 | 1 | 10.87  | n/a   | 6.157  | 1.837 | 2.004 | 3.186 | 1.002 | n/a  | n/a   | n/a   | 0.516 | n/a   | 0.936 | n/a   | 0.0227 |
| 1E+07 | 19 | 1 | 1 | 1 | 12.574 | n/a   | 7.322  | 2.632 | 2.181 | 3.367 | 1.382 | n/a  | n/a   | n/a   | 0.779 | n/a   | 1.152 | n/a   | 0.1174 |
| 1E+07 | 19 | 1 | 1 | 1 | 6.494  | n/a   | 5.53   | 2.309 | 2.029 | 2.926 | 0.898 | n/a  | n/a   | n/a   | 0.962 | n/a   | 0.884 | n/a   | 0.0159 |
| 1E+07 | 19 | 1 | 1 | 1 | 12.542 | n/a   | 6.311  | 3.05  | 2.41  | 3.983 | 1.545 | n/a  | n/a   | n/a   | 1.421 | n/a   | 0.903 | n/a   | 0.0598 |
| 1E+07 | 19 | 1 | 1 | 1 | 13.115 | n/a   | 7.176  | 2.004 | 2.295 | 3.788 | 1.434 | n/a  | n/a   | n/a   | 1.124 | n/a   | 1.307 | n/a   | 0.1247 |
| 1E+07 | 19 | 1 | 1 | 1 | 7.734  | n/a   | 10.316 | 2.77  | 2.073 | 4.409 | 2.569 | n/a  | n/a   | n/a   | 1.586 | n/a   | 1.722 | n/a   | 0.5439 |
| 1E+07 | 19 | 1 | 1 | 1 | 11.873 | n/a   | 11.846 | 2.556 | 2.954 | 4.746 | 1.924 | n/a  | n/a   | n/a   | 2.055 | n/a   | 1.951 | n/a   | 0.6781 |
| 1E+07 | 19 | 1 | 1 | 1 | 5.506  | n/a   | 7.569  | 3.338 | 1.991 | 3.849 | 1.745 | n/a  | n/a   | n/a   | 1.769 | n/a   | 2.215 | n/a   | 0.9776 |
| 1E+07 | 20 | 1 | 1 | 1 | 10.145 | n/a   | 10.598 | 1.942 | 1.687 | 4.265 | 2.569 | n/a  | n/a   | n/a   | 0.583 | n/a   | 0.897 | n/a   | 0.3276 |
| 1E+07 | 20 | 1 | 1 | 1 | 7.766  | n/a   | 9.593  | 1.801 | 2.366 | 3.423 | 1.182 | n/a  | n/a   | n/a   | 0.862 | n/a   | 1.348 | n/a   | 0.294  |
| 1E+07 | 20 | 1 | 1 | 1 | 5.701  | n/a   | 9.598  | 2.244 | 2.295 | 3.674 | 1.434 | n/a  | n/a   | n/a   | 0.619 | n/a   | 0.966 | n/a   | 0.2748 |
| 1E+07 | 20 | 1 | 1 | 1 | 8.276  | n/a   | 10.632 | 2.491 | 2.313 | 4.37  | 2.088 | n/a  | n/a   | n/a   | 1.207 | n/a   | 1.392 | n/a   | 0.4241 |
| 1E+07 | 20 | 1 | 1 | 1 | 6.971  | n/a   | 8.656  | 2.123 | 2.284 | 3.502 | 1.308 | n/a  | n/a   | n/a   | 0.903 | n/a   | 1.255 | n/a   | 0.2265 |
| 1E+07 | 20 | 1 | 1 | 1 | 8.567  | n/a   | 9.682  | 3.215 | 2.984 | 5.109 | 2.464 | n/a  | n/a   | n/a   | 0.684 | n/a   | 1.175 | n/a   | 0.2885 |
| 1E+07 | 20 | 1 | 1 | 1 | 12.384 | n/a   | 10.906 | 1.787 | 2.67  | 4.536 | 1.907 | n/a  | n/a   | n/a   | 1.233 | n/a   | 1.407 | n/a   | 0.4454 |
| 1E+07 | 20 | 1 | 1 | 1 | 14.084 | n/a   | 10.52  | 2.185 | 1.814 | 4.235 | 2.295 | n/a  | n/a   | n/a   | 0.865 | n/a   | 0.9   | n/a   | 0.3475 |
| 1E+07 | 20 | 1 | 1 | 1 | 8.692  | n/a   | 10.173 | 2.185 | 2.358 | 4.313 | 2.15  | n/a  | n/a   | n/a   | 1.138 | n/a   | 1.566 | n/a   | 0.418  |
| 1E+07 | 20 | 1 | 1 | 1 | 13.855 | n/a   | 11.046 | 2.478 | 2.181 | 3.859 | 1.745 | n/a  | n/a   | n/a   | 0.773 | n/a   | 1.056 | n/a   | 0.3794 |
| 1E+07 | 20 | 1 | 1 | 1 | 7.627  | n/a   | 10.503 | 2.441 | 2.341 | 4.282 | 1.942 | n/a  | n/a   | n/a   | 0.95  | n/a   | 1.121 | n/a   | 0.3619 |
| 1E+07 | 20 | 1 | 1 | 1 | 8.317  | n/a   | 10.716 | 2.569 | 2.181 | 4.506 | 2.366 | n/a  | n/a   | n/a   | 1.396 | n/a   | 1.351 | n/a   | 0.4702 |
| 1E+07 | 20 | 1 | 1 | 1 | 7.171  | n/a   | 6.011  | 2.834 | 1.996 | 2.53  | 0.898 | n/a  | n/a   | n/a   | 0.957 | n/a   | 0.97  | n/a   | 0.0273 |
| 1E+07 | 20 | 1 | 1 | 1 | 7.718  | n/a   | 6.388  | 3.003 | 2.53  | 4.328 | 1.962 | n/a  | n/a   | n/a   | 1.604 | n/a   | 2.264 | n/a   | 0.9732 |
| 1E+07 | 20 | 1 | 1 | 1 | 6.306  | n/a   | 7.103  | 2.313 | 2.397 | 3.574 | 1.263 | n/a  | n/a   | n/a   | 0.936 | n/a   | 1.142 | n/a   | 0.1076 |
| 1E+07 | 20 | 1 | 1 | 1 | 10.779 | n/a   | 6.152  | 2.546 | 2.438 | 3.21  | 0.642 | n/a  | n/a   | n/a   | 1.194 | n/a   | 1.129 | n/a   | 0.0458 |
| 1E+07 | 20 | 1 | 1 | 1 | 12.784 | n/a   | 11.792 | 3.27  | 2.869 | 4.885 | 2.135 | n/a  | n/a   | n/a   | 2.575 | n/a   | 1.832 | n/a   | 0.7257 |
| 1E+07 | 20 | 1 | 1 | 1 | 7.628  | n/a   | 5.48   | 1.991 | 1.721 | 3.594 | 1.814 | n/a  | n/a   | n/a   | 0.78  | n/a   | 1.082 | n/a   | 0.0136 |
| 1E+07 | 20 | 1 | 1 | 2 | 9.374  | 0.581 | 8.898  | 3.335 | 2.77  | 4.43  | 1.673 | n/a  | n/a   | n/a   | 2.38  | n/a   | 2.33  | n/a   | 0.8999 |
| 1E+07 | 21 | 1 | 2 | 2 | 6.926  | 2.578 | 6.487  | 4.145 | 2.073 | 3.374 | 1.434 | n/a  | 3.006 | 1.545 | 2.814 | n/a   | 0.975 | 1.08  | 0.921  |
| 1E+07 | 21 | 1 | 1 | 1 | 10.942 | n/a   | 9.73   | 2.386 | 1.894 | 3.747 | 1.907 | n/a  | n/a   | n/a   | 1.065 | n/a   | 1.154 | n/a   | 0.3107 |
| 1E+07 | 21 | 1 | 1 | 1 | 6.031  | n/a   | 8.223  | 2.073 | 2.241 | 3.674 | 1.388 | n/a  | n/a   | n/a   | 1.07  | n/a   | 1.048 | n/a   | 0.1798 |
| 1E+07 | 21 | 1 | 1 | 1 | 7.282  | n/a   | 8.784  | 2.309 | 2.274 | 4.018 | 1.787 | n/a  | n/a   | n/a   | 0.988 | n/a   | 1.039 | n/a   | 0.2292 |
| 1E+07 | 21 | 1 | 1 | 1 | 12.416 | n/a   | 10.921 | 1.339 | 2.27  | 4.414 | 2.123 | n/a  | n/a   | n/a   | 0.991 | n/a   | 1.051 | n/a   | 0.3765 |
| 1E+07 | 21 | 1 | 1 | 1 | 12.071 | n/a   | 11.302 | 2.214 | 2.53  | 4.194 | 1.711 | n/a  | n/a   | n/a   | 0.986 | n/a   | 1.069 | n/a   | 0.4001 |
| 1E+07 | 21 | 1 | 1 | 1 | 12.665 | n/a   | 12.488 | 2.594 | 2.341 | 6.163 | 3.72  | n/a  | n/a   | n/a   | 1.041 | n/a   | 1.316 | n/a   | 0.4546 |
| 1E+07 | 21 | 1 | 1 | 1 | 7.942  | n/a   | 10.43  | 2.569 | 1.929 | 4.378 | 2.491 | n/a  | n/a   | n/a   | 0.879 | n/a   | 1.048 | n/a   | 0.3533 |
| 1E+07 | 21 | 1 | 1 | 1 | 9.344  | n/a   | 7.668  | 2.073 | 1.85  | 3.613 | 1.929 | n/a  | n/a   | n/a   | 0.609 | n/a   | 0.879 | n/a   | 0.1395 |
| 1E+07 | 21 | 1 | 1 | 1 | 8.609  | n/a   | 10.014 | 2.962 | 2.569 | 4.62  | 1.929 | n/a  | n/a   | n/a   | 1.077 | n/a   | 1.816 | n/a   | 0.4301 |
| 1E+07 | 21 | 1 | 1 | 1 | 10.037 | n/a   | 6.996  | 2.088 | 2.313 | 3.207 | 0.907 | n/a  | n/a   | n/a   | 0.871 | n/a   | 1.041 | n/a   | 0.0931 |
| 1E+07 | 21 | 1 | 1 | 1 | 5.781  | n/a   | 7.058  | 2.421 | 2.116 | 3.522 | 1.29  | n/a  | n/a   | n/a   | 0.687 | n/a   | 1.273 | n/a   | 0.1028 |
| 1E+07 | 21 | 1 | 1 | 1 | 9.23   | n/a   | 12.774 | 2.438 | 2.295 | 4.131 | 1.721 | n/a  | n/a   | n/a   | 1.96  | n/a   | 1.723 | n/a   | 0.5974 |

|       |    |   |   |   |        |       |        |       |       |       |       |     |     |     |       |     |       |     |        |
|-------|----|---|---|---|--------|-------|--------|-------|-------|-------|-------|-----|-----|-----|-------|-----|-------|-----|--------|
| 1E+07 | 21 | 1 | 1 | 1 | 12.482 | n/a   | 11.998 | 2.598 | 2.706 | 4.519 | 1.684 | n/a | n/a | n/a | 1.11  | n/a | 2.034 | n/a | 0.5243 |
| 1E+07 | 21 | 1 | 1 | 1 | 10.803 | n/a   | 10.778 | 2.366 | 2.826 | 4.649 | 1.745 | n/a | n/a | n/a | 1.67  | n/a | 1.986 | n/a | 0.6077 |
| 1E+07 | 21 | 1 | 1 | 1 | 9.434  | n/a   | 11.812 | 2.642 | 2.582 | 4.178 | 1.539 | n/a | n/a | n/a | 0.98  | n/a | 1.564 | n/a | 0.4516 |
| 1E+07 | 21 | 1 | 1 | 1 | 4.694  | n/a   | 6.101  | 1.907 | 2.468 | 3.613 | 1.539 | n/a | n/a | n/a | 1.09  | n/a | 1.145 | n/a | 0.0388 |
| 1E+07 | 21 | 1 | 1 | 2 | 8.444  | 0.165 | 11.025 | 2.057 | 2.763 | 5.413 | 2.869 | n/a | n/a | n/a | 1.879 | n/a | 1.52  | n/a | 0.5604 |
| 1E+07 | 21 | 1 | 1 | 1 | 4.654  | n/a   | 9.184  | 2.029 | 2.207 | 4.786 | 1.837 | n/a | n/a | n/a | 2.003 | n/a | 1.549 | n/a | 0.594  |
| 1E+07 | 21 | 1 | 1 | 2 | 12.364 | 0.062 | 12.298 | 2.849 | 2.645 | 5.359 | 2.566 | n/a | n/a | n/a | 2.613 | n/a | 2.127 | n/a | 0.7635 |
| 1E+07 | 21 | 1 | 1 | 1 | 17.33  | n/a   | 11.969 | 3.084 | 2.594 | 4.761 | 2.192 | n/a | n/a | n/a | 1.916 | n/a | 1.847 | n/a | 0.6319 |
| 1E+07 | 21 | 1 | 1 | 1 | 11.658 | n/a   | 10.092 | 2.678 | 2.817 | 4.65  | 1.907 | n/a | n/a | n/a | 2.46  | n/a | 2.056 | n/a | 0.7295 |
| 1E+07 | 21 | 1 | 1 | 1 | 14.255 | n/a   | 11.179 | 3.019 | 2.617 | 4.235 | 1.787 | n/a | n/a | n/a | 1.633 | n/a | 1.707 | n/a | 0.5504 |
| 1E+07 | 21 | 1 | 1 | 2 | 9.969  | 0.431 | 10.807 | 2.962 | 2.556 | 3.979 | 1.55  | n/a | n/a | n/a | 2.016 | n/a | 2.553 | n/a | 0.7407 |
| 1E+07 | 21 | 1 | 1 | 1 | 10.858 | n/a   | 6.171  | 2.645 | 2.135 | 3.028 | 1.411 | n/a | n/a | n/a | 0.991 | n/a | 1.342 | n/a | 0.0481 |
